# Supplementary material for: Perceptions of Social Media Safety in Japan
Source: Research Square preprint supplement (doi:10.21203/rs.3.rs-1760219/v1), 2022-07-22
Supplement: Supplementary file 1 [file 42106e7a10fab99229cc5334.xlsx]

## Sheet: Psychologicl safety
No.	Social media_name	gender	age	frequency	safety_1_score	safety_2_score	safety_3_score	safety_4_score	safety_5_score	safety_6_score	safety_7_score	total score
1	LINE	Male	50's	Almost everyday	5	5	4	5	5	5	3	32
2	LINE	Male	40's	Almost everyday	5	3	6	5	3	4	5	31
3	LINE	Male	40's	Less than once a month	4	4	4	4	3	4	4	27
4	LINE	Male	50's	Almost everyday	5	4	4	4	2	4	3	26
5	LINE	Female	40's	Almost everyday	4	2	4	5	3	3	1	22
6	LINE	Male	30's	Once every few days	5	3	5	5	4	4	3	29
7	LINE	Male	40's	Once every few days	4	4	4	4	2	4	4	26
8	LINE	Male	40's	Almost everyday	4	3	4	5	4	4	4	28
9	LINE	Male	30's	Once every few days	3	4	3	4	2	4	3	23
10	LINE	Female	30's	Almost everyday	4	5	5	3	4	3	4	28
11	LINE	Female	40's	Almost everyday	5	4	5	3	3	5	2	27
12	LINE	Male	40's	Almost everyday	2	2	5	6	2	3	5	25
13	LINE	Male	40's	Almost everyday	5	3	3	4	4	4	5	28
14	LINE	Male	50's	Almost everyday	4	4	5	3	4	4	4	28
15	LINE	Male	40's	Almost everyday	5	5	4	6	4	5	3	32
16	LINE	Male	50's	Almost everyday	3	3	4	4	3	3	5	25
17	LINE	Female	50's	Almost everyday	3	1	4	6	1	4	5	24
18	LINE	Male	50's	Once every few days	4	4	4	4	4	4	5	29
19	LINE	Male	50's	Almost everyday	5	5	3	4	3	4	4	28
20	LINE	Male	50's	Rarely	4	3	5	6	3	4	2	27
21	LINE	Male	40's	Just created an account	4	3	4	5	4	4	3	27
22	LINE	Male	50's	Once every few days	2	3	5	5	2	4	5	26
23	LINE	Male	40's	Almost everyday	4	4	4	4	4	4	4	28
24	LINE	Male	50's	Once every few days	6	5	4	3	1	4	4	27
25	LINE	Male	50's	Almost everyday	5	4	4	4	3	5	5	30
26	LINE	Male	50's	Almost everyday	7	6	5	1	3	3	2	27
27	LINE	Female	30's	Almost everyday	1	1	6	7	1	4	7	27
28	LINE	Male	40's	Almost everyday	5	4	5	5	3	4	5	31
29	LINE	Male	40's	Almost everyday	4	3	5	6	4	3	6	31
30	LINE	Male	40's	Almost everyday	4	2	4	5	4	4	5	28
31	LINE	Female	30's	Almost everyday	4	4	3	4	4	4	4	27
32	LINE	Male	50's	Rarely	4	4	4	4	4	4	4	28
33	LINE	Female	30's	Almost everyday	1	1	5	6	4	3	5	25
34	LINE	Female	40's	Almost everyday	6	4	4	3	3	4	3	27
35	LINE	Female	40's	Almost everyday	3	3	5	6	4	4	5	30
36	LINE	Male	40's	Almost everyday	4	4	4	5	4	4	4	29
37	LINE	Female	40's	Almost everyday	5	5	5	4	3	5	4	31
38	LINE	Female	50's	Once every few days	5	4	4	4	3	3	3	26
39	LINE	Female	40's	Almost everyday	6	3	5	5	4	5	3	31
40	LINE	Female	40's	Almost everyday	5	3	3	3	3	3	3	23
41	LINE	Male	40's	Almost everyday	5	5	5	3	3	3	3	27
42	LINE	Female	60's	Almost everyday	6	4	5	5	2	3	3	28
43	LINE	Female	50's	Almost everyday	6	4	5	4	4	4	4	31
44	LINE	Male	50's	Almost everyday	3	2	4	5	2	3	3	22
45	LINE	Male	50's	Almost everyday	7	7	6	7	6	6	4	43
46	LINE	Female	40's	Almost everyday	3	3	1	5	1	1	5	19
47	LINE	Male	40's	Rarely	3	3	4	5	3	4	4	26
48	LINE	Male	50's	Almost everyday	7	7	7	7	4	4	4	40
49	LINE	Male	50's	Almost everyday	7	3	5	4	5	5	4	33
50	LINE	Female	20's	Almost everyday	4	4	5	5	4	4	5	31
51	LINE	Male	50's	Almost everyday	5	4	5	5	4	4	5	32
52	LINE	Female	40's	Almost everyday	4	4	4	4	4	4	4	28
53	LINE	Female	50's	Almost everyday	4	3	4	4	3	3	4	25
54	LINE	Male	30's	Almost everyday	1	1	6	5	1	3	5	22
55	LINE	Male	50's	Almost everyday	3	2	3	5	2	3	4	22
56	LINE	Male	40's	Almost everyday	4	3	5	2	2	4	4	24
57	LINE	Female	30's	Once every few days	5	5	6	4	4	3	2	29
58	LINE	Male	40's	Almost everyday	7	4	4	5	1	4	4	29
59	LINE	Male	30's	Almost everyday	5	2	4	4	4	4	5	28
60	LINE	Male	40's	Almost everyday	7	5	4	3	3	3	4	29
61	LINE	Male	30's	Just created an account	1	1	7	7	4	1	5	26
62	LINE	Male	40's	Once every few days	5	5	6	5	3	5	6	35
63	LINE	Male	40's	Almost everyday	7	6	5	2	2	4	3	29
64	LINE	Female	30's	Almost everyday	6	7	5	5	5	1	4	33
65	LINE	Male	30's	Almost everyday	3	3	5	5	3	4	3	26
66	LINE	Female	50's	Almost everyday	7	7	5	2	4	4	4	33
67	LINE	Male	40's	Almost everyday	7	2	4	6	3	5	5	32
68	LINE	Male	40's	Almost everyday	3	4	6	2	1	4	4	24
69	LINE	Male	50's	Once every few days	5	5	4	3	4	4	3	28
70	LINE	Female	50's	Almost everyday	7	1	7	7	5	4	7	38
71	LINE	Male	40's	Once every few days	3	3	3	3	2	5	2	21
72	LINE	Female	40's	Almost everyday	6	2	5	5	5	4	2	29
73	LINE	Male	50's	Less than once a month	5	3	5	5	3	5	5	31
74	LINE	Male	40's	Almost everyday	5	3	3	4	4	2	4	25
75	LINE	Female	40's	Almost everyday	7	3	7	7	7	6	4	41
76	LINE	Female	30's	Almost everyday	5	4	5	7	4	4	4	33
77	LINE	Female	40's	Almost everyday	5	3	4	5	4	4	3	28
78	LINE	Female	40's	Less than once a month	3	4	5	6	4	6	4	32
79	LINE	Male	40's	Almost everyday	4	4	4	4	4	4	4	28
80	LINE	Male	50's	Almost everyday	5	3	4	2	3	5	3	25
81	LINE	Male	40's	Almost everyday	3	3	4	3	4	4	5	26
82	LINE	Female	50's	Almost everyday	7	5	6	6	5	5	3	37
83	LINE	Male	50's	Once every few days	5	5	6	3	2	2	2	25
84	LINE	Male	40's	Once a month	4	4	6	6	4	4	4	32
85	LINE	Female	20's	Almost everyday	5	5	5	6	1	4	5	31
86	LINE	Male	50's	Almost everyday	3	4	4	4	4	4	4	27
87	LINE	Male	40's	Rarely	3	5	4	5	4	4	5	30
88	LINE	Female	40's	Almost everyday	4	3	5	5	3	3	5	28
89	LINE	Male	50's	Once every few days	6	6	6	2	2	2	2	26
90	LINE	Male	50's	Once a month	5	3	5	5	4	5	3	30
91	LINE	Female	30's	Almost everyday	4	4	4	4	3	5	3	27
92	LINE	Male	30's	Almost everyday	4	5	5	3	3	4	5	29
93	LINE	Male	40's	Almost everyday	6	3	4	5	5	4	4	31
94	LINE	Male	50's	Almost everyday	4	3	5	5	5	4	4	30
95	LINE	Female	40's	Almost everyday	6	4	5	4	4	4	4	31
96	LINE	Female	50's	Almost everyday	7	6	4	2	4	5	3	31
97	LINE	Male	40's	Almost everyday	4	3	2	1	1	4	2	17
98	LINE	Male	40's	Almost everyday	3	3	3	4	2	3	3	21
99	LINE	Male	40's	Almost everyday	3	3	5	6	5	4	4	30
100	LINE	Female	50's	Almost everyday	2	3	1	2	7	1	2	18
101	LINE	Male	30's	Almost everyday	4	4	4	4	4	4	4	28
102	LINE	Female	30's	Almost everyday	6	3	5	3	4	4	4	29
103	LINE	Male	40's	Once every few days	7	6	4	1	2	4	4	28
104	LINE	Male	50's	Almost everyday	5	5	4	3	4	4	3	28
105	LINE	Female	30's	Less than once a month	3	4	1	3	1	4	4	20
106	LINE	Female	20's	Once every few days	7	3	3	5	3	4	4	29
107	LINE	Female	40's	Once every few days	6	3	6	3	3	5	3	29
108	LINE	Male	60's	Once every few days	5	3	5	3	5	4	3	28
109	LINE	Female	50's	Once every few days	2	3	4	5	3	3	3	23
110	LINE	Male	40's	Almost everyday	4	5	4	4	3	4	3	27
111	LINE	Female	40's	Almost everyday	3	4	4	4	3	4	3	25
112	LINE	Male	50's	Almost everyday	4	4	4	4	2	4	4	26
113	LINE	Male	60's	Almost everyday	7	4	4	6	4	3	4	32
114	LINE	Female	50's	Almost everyday	3	4	4	4	3	3	4	25
115	LINE	Male	30's	Once a month	7	6	6	2	3	2	2	28
116	LINE	Male	30's	Once every few days	3	5	5	5	5	5	3	31
117	LINE	Female	50's	Once every few days	6	3	4	5	1	4	3	26
118	LINE	Male	50's	Once every few days	1	1	4	5	4	4	4	23
119	LINE	Male	30's	Rarely	3	3	5	5	5	3	4	28
120	LINE	Male	50's	Rarely	4	5	3	3	3	5	4	27
121	LINE	Male	40's	Almost everyday	2	3	4	5	3	4	4	25
122	LINE	Male	40's	Almost everyday	5	5	5	3	4	4	4	30
123	LINE	Male	40's	Once every few days	5	3	3	6	5	5	5	32
124	LINE	Male	40's	Once every few days	2	2	1	2	1	1	1	10
125	LINE	Male	30's	Almost everyday	4	5	3	3	3	4	2	24
126	LINE	Male	50's	Almost everyday	5	4	4	3	4	4	5	29
127	LINE	Male	50's	Almost everyday	4	4	5	6	3	4	5	31
128	LINE	Male	40's	Once every few days	3	5	7	7	5	5	6	38
129	LINE	Male	40's	Almost everyday	7	1	4	7	3	4	5	31
130	LINE	Male	30's	Almost everyday	4	4	4	4	2	4	3	25
131	LINE	Female	40's	Almost everyday	2	6	4	5	1	4	4	26
132	LINE	Male	50's	Almost everyday	5	7	6	5	4	4	5	36
133	LINE	Male	60's	Almost everyday	6	3	6	6	6	6	5	38
134	LINE	Male	40's	Rarely	7	2	6	6	5	5	4	35
135	LINE	Female	50's	Almost everyday	5	4	5	5	5	4	4	32
136	LINE	Male	30's	Almost everyday	5	5	5	5	4	4	3	31
137	LINE	Female	30's	Almost everyday	6	2	6	6	2	4	3	29
138	LINE	Female	40's	Once every few days	7	6	2	2	4	3	2	26
139	LINE	Female	50's	Once every few days	7	5	1	7	1	4	1	26
140	LINE	Male	40's	Almost everyday	3	4	4	4	4	4	4	27
141	LINE	Male	30's	Almost everyday	7	1	1	7	7	7	7	37
142	LINE	Female	50's	Almost everyday	6	5	4	2	4	4	2	27
143	LINE	Male	40's	Almost everyday	7	7	5	1	4	4	4	32
144	LINE	Male	40's	Almost everyday	5	3	5	3	4	3	3	26
145	LINE	Male	40's	Once every few days	4	4	4	4	4	4	4	28
146	LINE	Male	60's	Almost everyday	4	4	4	4	4	4	4	28
147	LINE	Female	20's	Once every few days	6	3	5	6	5	6	3	34
148	LINE	Male	50's	Once every few days	5	4	5	4	4	4	4	30
149	LINE	Male	30's	Once every few days	4	4	4	4	4	4	4	28
150	LINE	Male	50's	Almost everyday	2	2	3	5	3	4	5	24
151	LINE	Male	40's	Rarely	6	2	4	5	2	1	5	25
152	LINE	Male	30's	Once every few days	5	5	5	5	4	3	5	32
153	LINE	Male	50's	Almost everyday	3	4	5	3	3	3	3	24
154	LINE	Male	40's	Almost everyday	5	4	5	5	3	4	4	30
155	LINE	Male	40's	Less than once a month	6	4	5	3	4	3	3	28
156	LINE	Male	50's	Almost everyday	5	5	6	2	3	4	4	29
157	LINE	Female	30's	Almost everyday	4	3	4	4	4	4	4	27
158	LINE	Male	40's	Almost everyday	4	3	4	3	4	5	5	28
159	LINE	Male	40's	Almost everyday	7	3	6	4	3	4	4	31
160	LINE	Male	40's	Once every few days	3	3	3	5	4	5	4	27
161	LINE	Male	20's	Almost everyday	6	3	3	5	6	4	4	31
162	LINE	Male	50's	Once every few days	4	3	4	3	3	2	3	22
163	LINE	Male	40's	Once every few days	4	4	5	5	4	4	4	30
164	LINE	Female	20's	Almost everyday	4	5	5	4	3	2	4	27
165	LINE	Male	60's	Almost everyday	4	4	3	5	4	4	4	28
166	LINE	Male	40's	Once a month	3	3	5	5	3	3	5	27
167	LINE	Female	30's	Almost everyday	6	5	5	2	3	3	2	26
168	LINE	Male	30's	Once every few days	4	4	4	4	4	4	4	28
169	LINE	Male	40's	Almost everyday	5	6	4	4	3	4	4	30
170	LINE	Female	30's	Almost everyday	1	1	5	5	1	1	5	19
171	LINE	Female	30's	Almost everyday	7	1	6	7	5	4	4	34
172	LINE	Male	20's	Almost everyday	7	3	6	4	4	2	4	30
173	LINE	Male	40's	Once every few days	1	4	6	7	2	4	5	29
174	LINE	Male	30's	Almost everyday	5	5	5	5	4	4	4	32
175	LINE	Male	40's	Almost everyday	7	6	5	2	5	3	2	30
176	LINE	Male	30's	Rarely	1	4	4	6	3	3	3	24
177	LINE	Male	50's	Almost everyday	6	3	5	5	3	3	5	30
178	LINE	Female	50's	Almost everyday	6	4	4	5	4	4	3	30
179	LINE	Female	30's	Once every few days	3	5	5	6	3	4	5	31
180	LINE	Female	30's	Once a month	5	3	4	5	3	4	4	28
181	LINE	Male	40's	Once a month	4	4	4	5	4	4	5	30
182	LINE	Male	40's	Almost everyday	3	3	3	5	5	4	4	27
183	LINE	Female	40's	Almost everyday	3	4	2	2	1	3	6	21
184	LINE	Male	40's	Rarely	4	5	4	5	5	4	3	30
185	LINE	Male	50's	Once every few days	5	4	5	2	2	5	3	26
186	LINE	Female	40's	Almost everyday	3	3	3	4	5	5	4	27
187	LINE	Male	20's	Almost everyday	4	1	5	6	4	4	5	29
188	LINE	Female	40's	Almost everyday	3	3	3	5	3	3	5	25
189	LINE	Male	60's	Once a month	3	3	4	5	4	4	4	27
190	LINE	Male	30's	Almost everyday	5	2	2	6	5	5	5	30
191	LINE	Male	40's	Once every few days	4	4	4	4	4	4	4	28
192	LINE	Male	40's	Almost everyday	6	3	4	4	3	3	5	28
193	LINE	Female	40's	Almost everyday	4	4	4	4	4	4	4	28
194	LINE	Male	40's	Almost everyday	4	4	4	6	6	1	3	28
195	LINE	Male	50's	Less than once a month	3	3	3	4	4	4	4	25
196	LINE	Male	30's	Rarely	4	4	4	4	4	4	3	27
197	LINE	Female	50's	Almost everyday	3	3	4	5	5	4	5	29
198	LINE	Male	40's	Almost everyday	3	4	5	4	4	5	5	30
199	LINE	Female	40's	Almost everyday	5	5	5	5	4	5	3	32
200	LINE	Male	40's	Almost everyday	5	5	5	5	5	5	4	34
201	LINE	Male	40's	Almost everyday	4	5	2	4	2	2	3	22
202	LINE	Male	40's	Almost everyday	6	5	4	2	4	4	3	28
203	LINE	Female	40's	Almost everyday	5	4	4	4	3	4	4	28
204	LINE	Male	50's	Rarely	2	3	5	6	3	4	4	27
205	LINE	Female	50's	Almost everyday	5	4	4	3	3	4	2	25
206	LINE	Female	60's	Once a month	5	5	5	5	3	3	4	30
207	LINE	Female	50's	Almost everyday	4	4	3	4	5	4	5	29
208	LINE	Male	50's	Almost everyday	4	4	5	5	4	5	5	32
209	LINE	Male	50's	Once a month	3	3	4	5	1	2	4	22
210	LINE	Male	50's	Almost everyday	3	3	3	5	3	3	5	25
211	LINE	Female	40's	Almost everyday	6	3	4	5	6	4	4	32
212	LINE	Male	40's	Less than once a month	4	4	4	4	4	4	4	28
213	LINE	Male	50's	Almost everyday	3	2	3	4	4	3	4	23
214	LINE	Male	40's	Almost everyday	5	5	4	2	4	4	4	28
215	LINE	Male	50's	Almost everyday	6	3	5	5	4	4	5	32
216	LINE	Male	40's	Almost everyday	4	4	3	6	5	6	6	34
217	LINE	Male	40's	Almost everyday	3	3	5	5	3	4	5	28
218	LINE	Male	40's	Almost everyday	6	6	6	4	3	5	4	34
219	LINE	Male	40's	Once every few days	3	3	2	2	3	4	2	19
220	LINE	Male	40's	Once every few days	5	3	4	5	2	2	3	24
221	LINE	Male	40's	Once every few days	5	3	4	5	5	5	5	32
222	LINE	Male	40's	Almost everyday	5	4	5	5	4	4	4	31
223	LINE	Female	40's	Less than once a month	5	4	6	3	3	3	2	26
224	LINE	Male	40's	Just created an account	4	4	4	4	4	4	4	28
225	LINE	Male	50's	Once a month	3	4	5	6	4	4	5	31
226	LINE	Male	70's~	Almost everyday	3	2	3	5	1	3	4	21
227	LINE	Male	40's	Once every few days	4	2	4	3	2	3	2	20
228	LINE	Male	40's	Almost everyday	3	3	5	5	3	3	5	27
229	LINE	Male	50's	Almost everyday	5	5	6	5	5	2	5	33
230	LINE	Male	50's	Almost everyday	6	3	5	5	2	3	3	27
231	LINE	Male	60's	Almost everyday	4	3	4	4	5	3	2	25
232	LINE	Female	50's	Almost everyday	6	4	4	3	4	5	4	30
233	LINE	Female	30's	Almost everyday	5	4	4	4	4	3	4	28
234	LINE	Female	30's	Just created an account	1	1	5	5	2	1	7	22
235	LINE	Male	50's	Almost everyday	7	3	4	5	4	3	4	30
236	LINE	Male	60's	Almost everyday	6	6	6	6	6	6	6	42
237	LINE	Female	40's	Once every few days	1	1	6	6	1	2	4	21
238	LINE	Male	40's	Almost everyday	6	7	7	2	1	2	1	26
239	LINE	Female	50's	Almost everyday	5	3	5	6	4	4	4	31
240	LINE	Female	50's	Once every few days	4	2	4	5	3	4	2	24
241	LINE	Male	30's	Almost everyday	1	1	4	7	4	4	4	25
242	LINE	Male	60's	Once every few days	5	3	5	4	5	4	4	30
243	LINE	Male	40's	Once every few days	6	6	6	3	3	2	2	28
244	LINE	Male	50's	Almost everyday	3	3	5	5	3	4	5	28
245	LINE	Female	50's	Almost everyday	6	5	6	6	5	5	5	38
246	LINE	Female	50's	Almost everyday	6	4	5	5	4	5	4	33
247	LINE	Male	60's	Once every few days	5	5	5	5	5	4	5	34
248	LINE	Male	30's	Almost everyday	3	4	4	4	4	4	4	27
249	LINE	Male	50's	Once every few days	5	5	4	6	3	4	5	32
250	LINE	Female	30's	Once a month	3	6	4	2	1	7	2	25
251	LINE	Male	50's	Almost everyday	5	6	3	4	6	4	4	32
252	LINE	Female	40's	Almost everyday	5	3	4	5	3	3	5	28
253	LINE	Male	40's	Once every few days	5	3	5	5	3	3	4	28
254	LINE	Female	60's	Almost everyday	4	4	4	4	4	4	4	28
255	LINE	Female	40's	Once every few days	5	3	4	2	1	3	2	20
256	LINE	Male	30's	Almost everyday	6	6	6	5	1	3	3	30
257	LINE	Female	40's	Once every few days	4	4	3	4	5	4	3	27
258	LINE	Male	40's	Almost everyday	4	3	3	4	3	4	3	24
259	LINE	Male	30's	Almost everyday	5	3	4	4	6	3	4	29
260	LINE	Female	20's	Almost everyday	5	5	5	3	4	3	3	28
261	LINE	Female	40's	Almost everyday	5	4	5	5	5	5	5	34
262	LINE	Female	50's	Almost everyday	6	4	4	5	5	4	5	33
263	LINE	Male	40's	Almost everyday	7	4	4	2	4	4	4	29
264	LINE	Male	40's	Once a month	5	4	5	3	3	3	2	25
265	LINE	Male	50's	Once every few days	5	3	3	3	4	4	5	27
266	LINE	Female	20's	Almost everyday	3	4	4	4	4	4	4	27
267	LINE	Male	40's	Rarely	4	4	4	4	4	4	4	28
268	LINE	Female	50's	Almost everyday	5	5	5	5	4	3	5	32
269	LINE	Male	30's	Almost everyday	3	3	4	6	4	4	4	28
270	LINE	Male	40's	Almost everyday	4	4	4	4	4	4	4	28
271	LINE	Male	40's	Almost everyday	5	6	5	4	6	4	5	35
272	LINE	Female	30's	Almost everyday	4	3	5	5	3	4	2	26
273	LINE	Male	40's	Almost everyday	6	5	5	2	3	2	3	26
274	LINE	Female	30's	Almost everyday	4	4	4	4	4	4	4	28
275	LINE	Male	30's	Almost everyday	5	6	7	7	4	6	5	40
276	LINE	Male	40's	Almost everyday	3	3	4	5	3	5	5	28
277	LINE	Male	50's	Once a month	5	4	4	4	3	3	3	26
278	LINE	Male	50's	Once every few days	3	3	4	5	4	4	5	28
279	LINE	Male	40's	Once every few days	5	4	6	7	5	6	5	38
280	LINE	Male	40's	Almost everyday	5	3	4	6	4	5	3	30
281	LINE	Male	50's	Almost everyday	3	3	6	7	4	4	5	32
282	LINE	Male	40's	Almost everyday	3	2	2	2	4	5	4	22
283	LINE	Male	50's	Almost everyday	4	3	5	5	4	4	5	30
284	LINE	Female	50's	Almost everyday	6	6	4	2	1	4	3	26
285	LINE	Female	40's	Almost everyday	5	5	4	3	4	4	3	28
286	LINE	Male	20's	Almost everyday	5	3	6	5	3	4	5	31
287	LINE	Female	40's	Almost everyday	6	3	5	5	3	7	4	33
288	LINE	Male	50's	Less than once a month	4	4	4	3	4	4	4	27
289	LINE	Male	40's	Once every few days	3	5	5	5	1	1	2	22
290	LINE	Female	40's	Almost everyday	5	5	5	6	2	4	4	31
291	LINE	Male	50's	Almost everyday	5	5	5	4	4	4	3	30
292	LINE	Male	50's	Almost everyday	7	4	5	5	3	3	3	30
293	LINE	Female	60's	Almost everyday	7	1	4	4	4	3	4	27
294	LINE	Male	20's	Almost everyday	4	2	3	5	5	6	2	27
295	LINE	Male	50's	Once a month	2	3	3	2	2	3	3	18
296	LINE	Male	40's	Almost everyday	4	4	3	5	5	5	4	30
297	LINE	Male	30's	Almost everyday	4	4	4	4	4	4	4	28
298	LINE	Male	30's	Almost everyday	3	4	5	6	4	4	4	30
299	LINE	Female	30's	Once every few days	5	4	4	5	3	4	3	28
300	LINE	Male	30's	Almost everyday	3	4	4	5	3	2	3	24
301	LINE	Female	20's	Almost everyday	5	2	4	3	5	3	4	26
302	LINE	Male	50's	Less than once a month	1	3	3	3	3	2	1	16
303	LINE	Female	30's	Almost everyday	4	6	5	3	4	4	1	27
304	LINE	Male	40's	Almost everyday	6	6	6	6	4	6	4	38
305	LINE	Female	30's	Almost everyday	5	4	3	4	5	4	2	27
306	LINE	Male	50's	Once every few days	5	3	3	4	2	5	3	25
307	LINE	Male	50's	Once every few days	4	5	5	3	2	4	4	27
308	LINE	Male	40's	Almost everyday	5	6	6	4	3	4	3	31
309	LINE	Female	60's	Less than once a month	6	5	6	5	4	6	2	34
310	LINE	Female	40's	Almost everyday	4	4	2	1	2	1	1	15
311	LINE	Female	20's	Rarely	3	2	5	2	1	2	2	17
312	LINE	Female	50's	Almost everyday	3	4	3	5	3	5	5	28
313	LINE	Male	60's	Once a month	5	3	3	4	4	4	3	26
314	LINE	Male	60's	Almost everyday	6	6	4	6	6	5	2	35
315	LINE	Male	40's	Once every few days	6	4	6	5	3	4	3	31
316	LINE	Male	50's	Once a month	4	4	5	3	4	4	3	27
317	LINE	Male	50's	Once every few days	6	6	6	2	3	2	2	27
318	LINE	Male	50's	Almost everyday	5	3	4	5	3	3	5	28
319	LINE	Male	40's	Once a month	6	6	3	1	3	5	6	30
320	LINE	Male	50's	Almost everyday	5	4	3	4	4	3	4	27
321	LINE	Male	40's	Almost everyday	5	5	4	3	3	4	3	27
322	LINE	Male	30's	Less than once a month	3	4	4	4	4	4	4	27
323	LINE	Male	60's	Almost everyday	3	2	2	3	1	2	2	15
324	LINE	Male	40's	Once every few days	5	5	6	4	4	2	2	28
325	LINE	Male	40's	Almost everyday	3	4	7	6	3	4	5	32
326	LINE	Male	60's	Almost everyday	4	3	5	5	3	4	3	27
327	LINE	Female	50's	Less than once a month	4	3	4	6	3	6	6	32
328	LINE	Male	40's	Once a month	3	6	4	2	2	2	3	22
329	LINE	Male	40's	Almost everyday	4	4	3	4	2	4	4	25
330	LINE	Male	30's	Almost everyday	6	6	6	5	2	3	4	32
331	LINE	Female	60's	Once every few days	4	5	5	5	2	4	4	29
332	LINE	Male	40's	Almost everyday	6	3	4	5	6	4	7	35
333	LINE	Female	50's	Almost everyday	6	5	6	5	6	6	3	37
334	LINE	Male	40's	Rarely	4	1	4	7	4	4	5	29
335	LINE	Female	20's	Once every few days	2	5	4	5	4	4	4	28
336	LINE	Male	30's	Almost everyday	6	5	6	1	6	1	3	28
337	LINE	Female	30's	Once every few days	4	4	4	5	5	4	4	30
338	LINE	Male	50's	Almost everyday	3	6	2	2	6	7	5	31
339	LINE	Female	50's	Less than once a month	4	4	3	3	2	3	3	22
340	LINE	Male	60's	Almost everyday	3	3	4	4	4	4	4	26
341	LINE	Male	50's	Almost everyday	7	6	5	5	3	4	4	34
342	LINE	Male	40's	Almost everyday	4	4	5	4	3	4	3	27
343	LINE	Female	50's	Almost everyday	7	7	5	1	4	5	4	33
344	LINE	Female	60's	Almost everyday	4	4	5	5	3	4	4	29
345	LINE	Male	50's	Almost everyday	5	3	4	6	4	3	3	28
346	LINE	Male	40's	Almost everyday	5	4	4	3	4	3	3	26
347	LINE	Female	40's	Once every few days	6	2	5	2	5	4	3	27
348	LINE	Female	40's	Almost everyday	6	3	5	6	6	4	5	35
349	LINE	Male	50's	Almost everyday	5	4	5	5	4	3	4	30
350	LINE	Male	30's	Almost everyday	7	4	5	5	5	5	3	34
351	LINE	Male	50's	Once a month	4	5	5	3	3	4	4	28
352	LINE	Male	60's	Almost everyday	5	3	5	6	3	4	3	29
353	LINE	Male	20's	Once every few days	5	5	4	5	3	3	3	28
354	LINE	Male	50's	Almost everyday	4	4	4	3	2	4	4	25
355	LINE	Male	40's	Almost everyday	4	4	4	4	4	4	4	28
356	LINE	Female	50's	Almost everyday	5	4	2	3	2	4	4	24
357	LINE	Male	50's	Almost everyday	4	4	1	1	1	4	1	16
358	LINE	Male	30's	Almost everyday	3	2	3	5	4	4	3	24
359	LINE	Male	30's	Almost everyday	5	4	6	6	3	4	5	33
360	LINE	Male	40's	Once every few days	5	3	5	5	5	5	6	34
361	LINE	Male	60's	Almost everyday	2	2	5	3	5	2	1	20
362	LINE	Male	40's	Once a month	7	3	4	5	1	4	4	28
363	LINE	Male	40's	Just created an account	4	4	5	5	4	4	4	30
364	LINE	Male	50's	Less than once a month	4	2	4	5	2	4	4	25
365	LINE	Female	30's	Almost everyday	4	4	2	4	3	4	3	24
366	LINE	Male	60's	Once every few days	3	3	3	5	5	5	5	29
367	LINE	Male	50's	Once every few days	3	4	4	5	5	5	5	31
368	LINE	Female	40's	Almost everyday	4	4	5	5	4	4	5	31
369	LINE	Male	40's	Just created an account	4	4	4	4	4	4	4	28
370	LINE	Female	40's	Almost everyday	6	6	5	2	3	5	4	31
371	LINE	Female	30's	Almost everyday	5	3	5	5	4	3	4	29
372	LINE	Female	40's	Almost everyday	4	5	4	4	4	5	3	29
373	LINE	Male	40's	Less than once a month	3	3	5	4	3	3	4	25
374	LINE	Male	40's	Once a month	5	3	5	4	1	4	3	25
375	LINE	Female	20's	Almost everyday	5	4	2	3	2	3	3	22
376	LINE	Female	30's	Almost everyday	7	2	6	6	4	4	4	33
377	LINE	Female	50's	Almost everyday	7	6	5	6	5	6	5	40
378	LINE	Male	30's	Almost everyday	5	3	5	5	4	4	5	31
379	LINE	Male	10's	Almost everyday	7	7	7	1	1	1	1	25
380	LINE	Male	30's	Almost everyday	6	5	6	5	5	3	5	35
381	LINE	Female	30's	Almost everyday	3	3	5	5	5	4	3	28
382	LINE	Female	40's	Almost everyday	5	4	5	3	4	4	3	28
383	LINE	Female	50's	Almost everyday	4	4	4	4	3	4	4	27
384	LINE	Male	40's	Once every few days	5	5	6	5	4	6	3	34
385	LINE	Male	40's	Less than once a month	2	3	2	5	2	4	2	20
386	LINE	Male	20's	Once every few days	7	7	7	1	1	1	1	25
387	LINE	Male	40's	Rarely	2	1	6	5	1	3	4	22
388	LINE	Female	40's	Almost everyday	4	4	5	3	7	5	5	33
389	LINE	Male	30's	Almost everyday	7	7	7	2	2	2	1	28
390	LINE	Female	20's	Almost everyday	5	4	4	5	4	4	5	31
391	LINE	Female	30's	Almost everyday	6	3	6	5	3	3	3	29
392	LINE	Male	30's	Almost everyday	5	3	6	5	5	4	5	33
393	LINE	Male	40's	Almost everyday	3	2	5	6	3	5	7	31
394	LINE	Female	30's	Almost everyday	6	6	6	6	4	6	6	40
395	LINE	Male	40's	Almost everyday	4	4	3	6	4	6	6	33
396	LINE	Male	30's	Almost everyday	7	4	4	1	5	5	4	30
397	LINE	Female	30's	Almost everyday	4	4	4	4	4	4	4	28
398	LINE	Male	20's	Almost everyday	7	3	5	6	5	6	5	37
399	LINE	Male	50's	Once a month	2	1	4	4	3	4	4	22
400	LINE	Male	40's	Almost everyday	5	3	4	4	4	3	2	25
401	LINE	Male	50's	Just created an account	3	2	5	5	1	3	5	24
402	LINE	Female	20's	Almost everyday	6	4	5	5	2	4	2	28
403	LINE	Female	20's	Almost everyday	7	4	5	4	4	5	4	33
404	LINE	Female	20's	Almost everyday	3	3	5	5	4	3	4	27
405	LINE	Female	30's	Once every few days	6	4	4	4	4	4	4	30
406	LINE	Male	20's	Almost everyday	6	6	5	5	4	2	3	31
407	LINE	Male	30's	Once every few days	4	4	4	4	4	4	4	28
408	LINE	Male	40's	Almost everyday	6	6	5	5	3	3	4	32
409	LINE	Male	50's	Almost everyday	7	4	4	4	4	4	5	32
410	LINE	Male	60's	Once every few days	3	3	3	6	4	3	5	27
411	LINE	Male	30's	Just created an account	6	3	4	1	2	6	5	27
412	LINE	Female	30's	Almost everyday	3	3	5	6	3	4	5	29
413	LINE	Female	30's	Once every few days	3	1	5	6	4	4	5	28
414	LINE	No answer	40's	Once every few days	2	3	3	3	2	4	3	20
415	LINE	Female	30's	Almost everyday	7	5	5	3	4	5	3	32
416	LINE	Male	70's~	Almost everyday	4	5	3	5	5	4	4	30
417	LINE	Female	30's	Almost everyday	6	3	4	4	4	4	4	29
418	LINE	Female	30's	Almost everyday	5	5	5	5	5	5	5	35
419	LINE	Female	40's	Once a month	7	7	2	2	1	4	1	24
420	LINE	Male	30's	Rarely	5	3	4	5	2	3	3	25
421	LINE	Male	40's	Once every few days	2	1	5	5	1	2	6	22
422	LINE	Male	40's	Almost everyday	4	3	5	4	4	4	5	29
423	LINE	Female	40's	Almost everyday	2	3	5	6	4	5	5	30
424	LINE	Male	70's~	Once every few days	6	5	4	4	4	5	4	32
425	LINE	Male	40's	Almost everyday	4	4	4	4	4	4	4	28
426	LINE	Female	30's	Almost everyday	7	6	5	5	6	7	4	40
427	LINE	Male	50's	Less than once a month	3	3	6	6	3	3	5	29
428	LINE	Male	60's	Rarely	4	3	4	4	2	4	3	24
429	LINE	Female	40's	Almost everyday	3	3	5	5	4	5	5	30
430	LINE	Male	40's	Almost everyday	5	5	5	3	4	4	3	29
431	LINE	Female	40's	Almost everyday	5	4	5	5	4	5	3	31
432	LINE	Female	40's	Once a month	5	3	2	5	1	4	2	22
433	LINE	Male	40's	Almost everyday	4	3	4	3	4	3	4	25
434	LINE	Female	60's	Almost everyday	7	5	3	2	4	6	4	31
435	LINE	Female	40's	Almost everyday	5	3	4	4	4	4	4	28
436	LINE	Female	40's	Almost everyday	4	3	4	3	4	4	5	27
437	LINE	Female	30's	Almost everyday	3	2	5	5	3	4	3	25
438	LINE	Female	30's	Almost everyday	5	4	5	5	4	5	4	32
439	LINE	Male	30's	Once every few days	5	1	4	4	2	3	5	24
440	LINE	Female	40's	Almost everyday	3	4	4	5	1	5	3	25
441	LINE	Male	30's	Almost everyday	3	1	6	5	3	3	4	25
442	LINE	Male	40's	Once a month	7	7	6	2	1	2	1	26
443	LINE	No answer	20's	Almost everyday	2	3	3	4	6	6	5	29
444	LINE	Female	30's	Almost everyday	7	6	6	4	3	4	4	34
445	LINE	Male	40's	Almost everyday	4	5	4	5	3	4	4	29
446	LINE	Male	50's	Once every few days	5	3	4	4	4	4	5	29
447	LINE	Female	30's	Almost everyday	4	2	6	6	1	4	4	27
448	LINE	Male	50's	Once a month	4	3	3	5	3	4	3	25
449	LINE	Male	30's	Almost everyday	2	5	5	4	3	4	5	28
450	LINE	Female	30's	Almost everyday	5	5	4	3	4	4	4	29
451	LINE	Male	40's	Almost everyday	4	4	4	5	4	3	3	27
452	LINE	Male	40's	Almost everyday	5	3	5	6	3	5	5	32
453	LINE	Male	40's	Once every few days	5	4	4	4	5	5	3	30
454	LINE	Female	50's	Almost everyday	7	7	4	2	5	5	4	34
455	LINE	Female	50's	Almost everyday	3	2	6	7	3	4	5	30
456	LINE	Male	50's	Once a month	3	3	4	4	3	3	3	23
457	LINE	Male	50's	Once every few days	4	4	5	5	4	4	4	30
458	LINE	Male	40's	Almost everyday	6	5	3	6	5	4	5	34
459	LINE	Male	40's	Almost everyday	4	4	4	4	4	4	4	28
460	LINE	Male	40's	Once every few days	3	3	5	5	5	4	4	29
461	LINE	Male	30's	Less than once a month	1	3	6	3	1	6	5	25
462	LINE	Male	50's	Just created an account	5	4	4	4	4	4	4	29
463	LINE	Male	40's	Once a month	4	5	3	4	3	4	4	27
464	LINE	Male	60's	Almost everyday	5	4	4	4	3	4	4	28
465	LINE	Male	40's	Almost everyday	5	2	3	5	4	4	4	27
466	LINE	Male	20's	Almost everyday	5	5	6	6	3	3	2	30
467	LINE	Female	40's	Almost everyday	6	4	4	2	1	4	3	24
468	LINE	Male	40's	Once every few days	5	3	4	7	4	4	5	32
469	LINE	Male	30's	Almost everyday	7	6	6	6	7	5	5	42
470	LINE	Female	40's	Almost everyday	3	4	3	5	4	5	4	28
471	LINE	Female	50's	Once every few days	7	3	5	7	5	5	4	36
472	LINE	Female	40's	Almost everyday	7	6	6	6	4	6	4	39
473	LINE	Male	40's	Almost everyday	6	4	5	6	5	5	4	35
474	LINE	Female	40's	Almost everyday	7	1	4	5	4	4	3	28
475	LINE	Female	30's	Almost everyday	6	5	5	6	5	6	4	37
476	LINE	Male	60's	Almost everyday	4	1	6	1	4	4	3	23
477	LINE	Male	40's	Almost everyday	7	7	4	4	4	5	4	35
478	LINE	Male	40's	Almost everyday	5	2	6	6	6	2	4	31
479	LINE	Male	40's	Once every few days	4	3	3	3	2	3	3	21
480	LINE	Male	40's	Almost everyday	6	4	5	5	5	4	4	33
481	LINE	Male	50's	Almost everyday	5	4	5	3	4	4	4	29
482	LINE	Male	40's	Almost everyday	4	5	4	4	4	4	4	29
483	LINE	Male	40's	Almost everyday	5	3	4	4	4	4	4	28
484	LINE	Male	50's	Almost everyday	6	3	5	5	4	4	5	32
485	LINE	Male	40's	Almost everyday	4	3	3	4	4	4	4	26
486	LINE	Male	40's	Almost everyday	7	4	3	4	3	4	4	29
487	LINE	Female	40's	Almost everyday	5	5	4	3	4	4	2	27
488	LINE	Male	30's	Almost everyday	6	5	5	5	4	4	4	33
489	LINE	Male	30's	Almost everyday	5	5	5	4	2	4	4	29
490	LINE	Male	50's	Almost everyday	6	4	4	4	3	4	4	29
491	LINE	Male	70's~	Rarely	3	3	5	6	3	4	6	30
492	LINE	Male	40's	Almost everyday	3	4	4	5	2	3	3	24
493	LINE	Male	40's	Almost everyday	3	2	6	6	4	4	5	30
494	LINE	Female	40's	Almost everyday	5	5	3	5	4	4	4	30
495	LINE	Female	20's	Almost everyday	5	5	1	4	2	4	4	25
496	LINE	Female	30's	Almost everyday	7	3	7	4	4	4	4	33
497	LINE	Male	40's	Almost everyday	7	3	5	3	4	3	3	28
498	LINE	Male	40's	Once every few days	4	4	4	4	4	4	4	28
499	LINE	Male	50's	Almost everyday	7	6	5	2	3	3	3	29
500	LINE	Female	50's	Almost everyday	7	4	4	4	2	4	4	29
501	LINE	Female	60's	Almost everyday	7	5	3	2	4	6	4	31
502	LINE	Female	40's	Almost everyday	7	6	3	3	5	1	1	26
503	LINE	Male	40's	Once every few days	2	2	5	6	2	3	4	24
504	LINE	Male	50's	Almost everyday	7	7	4	1	2	4	4	29
505	LINE	Male	60's	Almost everyday	4	4	4	4	4	4	2	26
506	LINE	Male	60's	Less than once a month	6	4	4	4	5	5	4	32
507	LINE	Female	50's	Once every few days	3	2	5	6	3	4	5	28
508	LINE	Female	50's	Almost everyday	4	2	3	2	3	3	5	22
509	LINE	Female	40's	Once every few days	4	3	3	6	3	4	3	26
510	LINE	Female	50's	Almost everyday	3	6	6	6	2	6	5	34
511	LINE	No answer	40's	Almost everyday	5	6	3	3	4	4	2	27
512	LINE	Female	30's	Almost everyday	5	4	4	4	5	4	3	29
513	LINE	Male	40's	Once a month	4	4	4	4	4	4	4	28
514	LINE	Female	20's	Once every few days	1	1	6	7	1	3	5	24
515	LINE	Female	30's	Almost everyday	4	3	5	5	4	5	4	30
516	LINE	Female	30's	Almost everyday	4	5	5	3	5	4	4	30
517	LINE	Female	60's	Almost everyday	3	3	4	4	4	4	4	26
518	LINE	Male	40's	Almost everyday	4	5	5	5	4	5	6	34
519	LINE	Female	30's	Almost everyday	5	4	3	5	4	4	3	28
520	LINE	Male	40's	Once every few days	6	5	5	5	4	5	4	34
521	LINE	Male	40's	Once every few days	3	2	4	3	2	3	4	21
522	LINE	Female	40's	Almost everyday	7	3	5	7	1	7	4	34
523	LINE	Female	30's	Almost everyday	6	3	5	5	4	2	3	28
524	LINE	Male	20's	Almost everyday	6	6	5	2	1	2	2	24
525	LINE	Male	40's	Almost everyday	7	6	6	1	1	2	2	25
526	LINE	Male	20's	Almost everyday	2	3	3	5	5	4	4	26
527	LINE	Female	70's~	Once every few days	7	6	6	5	6	6	4	40
528	LINE	Male	40's	Once a month	5	5	5	5	5	5	3	33
529	LINE	Female	30's	Almost everyday	4	3	5	5	6	5	6	34
530	LINE	Male	30's	Almost everyday	4	4	3	5	6	4	6	32
531	LINE	Female	40's	Almost everyday	7	4	5	4	4	4	2	30
532	LINE	Male	40's	Once every few days	2	2	1	1	1	1	1	9
533	LINE	No answer	40's	Almost everyday	3	4	4	6	4	4	4	29
534	LINE	Male	40's	Once every few days	5	3	5	5	4	4	4	30
535	LINE	Female	30's	Almost everyday	5	5	3	3	3	4	4	27
536	LINE	Male	40's	Once every few days	3	3	5	5	5	4	4	29
537	LINE	Female	40's	Almost everyday	5	3	6	5	1	4	2	26
538	LINE	Female	40's	Almost everyday	5	3	4	5	4	4	4	29
539	LINE	Male	40's	Less than once a month	3	3	3	5	5	5	5	29
540	LINE	Female	40's	Once every few days	7	3	6	5	3	4	1	29
541	LINE	Female	40's	Almost everyday	5	4	4	4	4	4	4	29
542	LINE	Male	60's	Less than once a month	2	3	2	5	4	6	3	25
543	LINE	Male	40's	Almost everyday	7	6	6	6	5	5	3	38
544	LINE	Male	40's	Almost everyday	5	3	4	4	4	3	5	28
545	LINE	Female	40's	Once every few days	5	3	6	5	5	5	4	33
546	LINE	Female	40's	Almost everyday	7	2	3	4	4	4	3	27
547	LINE	Male	30's	Almost everyday	4	4	4	4	4	4	4	28
548	LINE	Female	40's	Almost everyday	7	2	7	7	4	2	4	33
549	LINE	Male	40's	Almost everyday	5	4	5	3	3	3	4	27
550	LINE	Male	50's	Almost everyday	2	1	6	6	3	2	3	23
551	LINE	Female	40's	Once every few days	4	4	4	3	3	3	4	25
552	LINE	Female	30's	Almost everyday	3	1	4	3	1	3	4	19
553	LINE	Male	40's	Once every few days	5	3	5	5	3	5	3	29
554	LINE	Female	50's	Almost everyday	6	4	4	4	3	3	5	29
555	LINE	No answer	40's	Once every few days	7	7	7	1	1	1	1	25
556	LINE	Female	30's	Almost everyday	6	4	4	4	5	6	1	30
557	LINE	Female	30's	Almost everyday	6	3	5	2	4	4	3	27
558	LINE	Male	30's	Almost everyday	4	3	5	5	4	4	5	30
559	LINE	Female	40's	Almost everyday	6	3	3	5	3	4	5	29
560	LINE	Male	30's	Almost everyday	3	2	3	2	3	4	1	18
561	LINE	Male	30's	Once every few days	1	1	6	7	2	2	4	23
562	LINE	Female	40's	Almost everyday	3	3	3	2	2	3	5	21
563	LINE	Male	30's	Almost everyday	2	3	6	5	4	2	5	27
564	LINE	Male	30's	Almost everyday	2	2	7	6	3	4	4	28
565	LINE	Female	30's	Almost everyday	5	4	4	6	4	4	5	32
566	LINE	Female	50's	Almost everyday	7	3	6	7	5	5	4	37
567	LINE	Male	30's	Almost everyday	6	6	4	1	2	4	2	25
568	LINE	Male	50's	Almost everyday	7	5	4	2	3	3	3	27
569	LINE	Male	40's	Almost everyday	6	6	6	3	4	4	4	33
570	LINE	Male	30's	Almost everyday	7	6	6	6	6	3	6	40
571	LINE	Male	40's	Almost everyday	3	3	5	5	4	4	5	29
572	LINE	Male	30's	Almost everyday	5	1	7	7	1	3	6	30
573	LINE	Male	40's	Almost everyday	7	7	7	1	1	1	1	25
574	LINE	Female	50's	Almost everyday	6	3	5	6	4	4	5	33
575	LINE	Female	40's	Almost everyday	4	3	4	5	4	4	5	29
576	LINE	Female	20's	Almost everyday	2	1	5	7	1	5	6	27
577	LINE	Male	40's	Once every few days	6	6	4	2	4	4	4	30
578	LINE	Male	60's	Almost everyday	7	2	5	3	2	3	2	24
579	LINE	Male	50's	Once every few days	3	2	3	6	2	3	2	21
580	LINE	Male	50's	Almost everyday	6	6	3	2	6	6	4	33
581	LINE	Female	20's	Almost everyday	3	5	5	7	4	5	4	33
582	LINE	Male	30's	Once every few days	6	5	5	2	2	3	4	27
583	LINE	Male	40's	Almost everyday	5	3	3	6	6	5	6	34
584	LINE	Male	60's	Almost everyday	5	3	3	4	4	4	4	27
585	LINE	Male	60's	Almost everyday	5	3	3	2	4	4	4	25
586	LINE	Male	30's	Almost everyday	6	3	4	5	5	3	2	28
587	LINE	Female	40's	Almost everyday	3	2	5	6	4	2	3	25
588	LINE	Female	40's	Almost everyday	5	5	5	6	4	5	4	34
589	LINE	Female	40's	Almost everyday	7	1	7	7	4	3	2	31
590	LINE	Female	50's	Almost everyday	6	4	6	5	6	3	6	36
591	LINE	Male	20's	Almost everyday	2	3	4	3	4	4	5	25
592	LINE	Male	20's	Almost everyday	6	4	5	4	3	3	2	27
593	LINE	Male	50's	Almost everyday	4	3	4	4	3	4	5	27
594	LINE	Female	30's	Almost everyday	7	3	5	5	4	2	4	30
595	LINE	Male	40's	Almost everyday	5	3	5	3	4	4	4	28
596	LINE	Female	20's	Almost everyday	4	4	3	4	4	4	4	27
597	LINE	Female	40's	Almost everyday	5	4	3	4	4	4	4	28
598	LINE	Female	20's	Almost everyday	7	5	5	5	5	5	3	35
599	LINE	Female	40's	Almost everyday	7	3	5	5	4	5	5	34
600	Twitter	Male	40's	Almost everyday	5	4	2	3	5	5	6	30
601	Twitter	Male	40's	Almost everyday	4	5	4	3	4	4	4	28
602	Twitter	Male	50's	Once every few days	5	3	4	2	4	4	2	24
603	Twitter	Male	40's	Just created an account	3	5	3	3	5	3	5	27
604	Twitter	Male	40's	Less than once a month	3	5	3	3	4	4	4	26
605	Twitter	Male	40's	Almost everyday	2	5	2	3	5	2	5	24
606	Twitter	Female	40's	Almost everyday	7	7	1	5	6	4	7	37
607	Twitter	Male	30's	Once every few days	2	3	2	3	3	4	3	20
608	Twitter	Female	30's	Almost everyday	3	4	4	4	5	4	5	29
609	Twitter	Female	40's	Almost everyday	3	5	6	3	5	5	3	30
610	Twitter	Male	40's	Almost everyday	2	6	2	2	5	2	3	22
611	Twitter	Male	40's	Once a month	5	4	3	4	3	5	4	28
612	Twitter	Male	50's	Once every few days	1	3	1	1	2	4	4	16
613	Twitter	Male	50's	Once a month	3	5	3	3	4	3	5	26
614	Twitter	Male	40's	Once every few days	3	3	3	2	3	4	4	22
615	Twitter	Female	50's	Almost everyday	2	5	1	1	3	4	4	20
616	Twitter	No answer	50's	Rarely	7	5	4	4	5	4	4	33
617	Twitter	Male	50's	Almost everyday	4	4	4	4	4	4	5	29
618	Twitter	Male	50's	Once every few days	5	3	3	1	2	4	4	22
619	Twitter	Male	50's	Rarely	5	5	3	4	5	3	4	29
620	Twitter	Male	50's	Rarely	3	3	3	4	3	4	3	23
621	Twitter	Male	50's	Once every few days	1	5	2	2	4	4	4	22
622	Twitter	Male	40's	Once every few days	4	4	4	4	4	4	4	28
623	Twitter	Male	50's	Once every few days	5	5	1	4	5	4	4	28
624	Twitter	Male	50's	Once every few days	5	3	5	4	6	4	4	31
625	Twitter	Male	50's	Rarely	5	3	5	2	4	3	2	24
626	Twitter	Female	30's	Once every few days	2	7	1	1	7	4	4	26
627	Twitter	Male	40's	Almost everyday	3	5	3	3	5	3	5	27
628	Twitter	Male	40's	Almost everyday	2	6	1	4	5	5	5	28
629	Twitter	Female	30's	Rarely	2	6	3	1	5	4	5	26
630	Twitter	Male	50's	Rarely	4	4	4	4	4	4	4	28
631	Twitter	Female	30's	Once every few days	3	5	2	4	4	3	5	26
632	Twitter	Female	40's	Almost everyday	3	5	2	2	3	4	4	23
633	Twitter	Male	40's	Once every few days	7	4	7	1	5	2	1	27
634	Twitter	Male	40's	Almost everyday	4	4	3	4	4	4	4	27
635	Twitter	Female	50's	Rarely	3	5	6	4	2	6	5	31
636	Twitter	Female	40's	Almost everyday	6	3	2	2	4	4	3	24
637	Twitter	Female	40's	Almost everyday	2	6	2	4	5	6	5	30
638	Twitter	Female	40's	Just created an account	3	3	3	3	3	3	2	20
639	Twitter	Male	40's	Once every few days	6	2	5	3	5	3	3	27
640	Twitter	Female	60's	Once every few days	4	5	3	4	5	3	4	28
641	Twitter	Male	50's	Almost everyday	1	3	1	1	2	2	3	13
642	Twitter	Male	50's	Almost everyday	6	2	2	4	5	3	2	24
643	Twitter	Female	40's	Almost everyday	1	5	1	1	2	1	5	16
644	Twitter	Female	40's	Almost everyday	5	5	2	2	5	3	5	27
645	Twitter	Male	40's	Almost everyday	1	2	1	1	1	3	4	13
646	Twitter	Male	50's	Just created an account	7	3	4	4	5	3	3	29
647	Twitter	Male	40's	Rarely	4	4	4	4	4	4	4	28
648	Twitter	Female	40's	Almost everyday	3	5	2	3	5	3	2	23
649	Twitter	Male	50's	Once every few days	5	5	4	3	5	4	3	29
650	Twitter	Female	40's	Once every few days	4	4	4	4	4	4	4	28
651	Twitter	Male	50's	Almost everyday	3	5	3	4	5	4	5	29
652	Twitter	Male	30's	Almost everyday	3	2	1	1	2	1	3	13
653	Twitter	Male	50's	Once a month	4	3	3	3	3	4	3	23
654	Twitter	Male	40's	Almost everyday	4	2	2	2	4	4	4	22
655	Twitter	Male	40's	Almost everyday	4	5	3	1	4	4	4	25
656	Twitter	Female	60's	Almost everyday	2	5	1	3	4	1	4	20
657	Twitter	Male	30's	Once every few days	5	3	3	6	6	1	2	26
658	Twitter	Male	30's	Almost everyday	4	5	3	3	4	4	4	27
659	Twitter	Male	40's	Rarely	6	4	4	3	4	2	4	27
660	Twitter	Male	30's	Almost everyday	1	7	1	4	7	1	7	28
661	Twitter	Male	40's	Once every few days	6	3	3	4	5	4	5	30
662	Twitter	Female	30's	Once every few days	3	6	2	3	6	4	4	28
663	Twitter	Male	40's	Once a month	2	6	1	2	4	3	5	23
664	Twitter	Male	40's	Rarely	3	2	6	2	7	5	4	29
665	Twitter	Male	50's	Less than once a month	4	2	5	5	4	3	4	27
666	Twitter	Male	40's	Once every few days	3	5	3	3	3	5	3	25
667	Twitter	Male	50's	Less than once a month	3	4	3	3	5	4	4	26
668	Twitter	Male	40's	Less than once a month	4	2	5	4	3	5	2	25
669	Twitter	Female	30's	Almost everyday	3	5	3	3	4	3	4	25
670	Twitter	Female	40's	Once every few days	5	5	3	3	3	4	3	26
671	Twitter	Female	40's	Less than once a month	4	3	4	4	4	5	4	28
672	Twitter	Male	40's	Rarely	7	7	1	4	4	4	1	28
673	Twitter	Male	50's	Almost everyday	3	5	3	3	5	2	5	26
674	Twitter	Male	40's	Almost everyday	5	5	3	3	5	3	4	28
675	Twitter	Male	40's	Once every few days	5	4	4	4	4	4	4	29
676	Twitter	Male	50's	Once every few days	3	3	3	3	3	3	3	21
677	Twitter	Male	40's	Almost everyday	2	5	3	2	5	4	3	24
678	Twitter	Female	20's	Almost everyday	6	3	6	5	3	3	5	31
679	Twitter	Female	20's	Less than once a month	4	5	4	1	4	4	5	27
680	Twitter	Male	50's	Almost everyday	4	4	4	4	4	4	4	28
681	Twitter	Female	40's	Once every few days	2	3	2	2	4	2	3	18
682	Twitter	Male	40's	Rarely	3	3	3	3	3	4	3	22
683	Twitter	Male	30's	Almost everyday	3	5	2	4	5	5	4	28
684	Twitter	Male	50's	Once every few days	7	2	6	2	6	2	2	27
685	Twitter	Male	50's	Less than once a month	5	5	3	5	5	5	5	33
686	Twitter	Male	30's	Once every few days	2	5	3	5	4	3	5	27
687	Twitter	Male	40's	Rarely	3	6	2	2	4	2	4	23
688	Twitter	Male	50's	Almost everyday	4	4	3	4	5	3	4	27
689	Twitter	Male	50's	Rarely	3	7	2	2	5	3	4	26
690	Twitter	Female	40's	Almost everyday	6	6	2	4	5	3	5	31
691	Twitter	Male	40's	Almost everyday	4	2	2	1	4	4	1	18
692	Twitter	Male	50's	Almost everyday	4	4	4	4	4	4	4	28
693	Twitter	Male	40's	Almost everyday	3	5	3	3	5	4	4	27
694	Twitter	Female	30's	Just created an account	4	5	1	3	5	3	4	25
695	Twitter	Female	50's	Once every few days	3	3	3	3	3	3	3	21
696	Twitter	Female	40's	Once every few days	5	3	4	4	5	4	3	28
697	Twitter	Female	50's	Almost everyday	2	4	2	7	2	4	2	23
698	Twitter	Male	30's	Almost everyday	4	4	4	4	4	4	4	28
699	Twitter	Female	30's	Almost everyday	6	4	5	3	4	3	4	29
700	Twitter	Male	40's	Just created an account	2	2	5	4	5	3	2	23
701	Twitter	Male	50's	Almost everyday	5	3	5	3	4	4	4	28
702	Twitter	Female	30's	Less than once a month	5	2	3	2	1	4	1	18
703	Twitter	Male	50's	Once every few days	4	4	3	3	4	4	5	27
704	Twitter	Female	20's	Almost everyday	2	5	2	4	5	2	5	25
705	Twitter	Male	60's	Once every few days	5	4	5	5	5	4	3	31
706	Twitter	Female	40's	Once every few days	5	4	5	5	4	4	4	31
707	Twitter	Female	50's	Once every few days	2	5	2	3	4	3	3	22
708	Twitter	Male	40's	Rarely	5	4	4	3	4	3	4	27
709	Twitter	Female	40's	Once a month	2	3	3	2	4	4	3	21
710	Twitter	Male	50's	Once every few days	2	5	4	1	5	4	4	25
711	Twitter	Male	60's	Almost everyday	3	5	2	2	4	4	3	23
712	Twitter	Female	50's	Once every few days	2	4	3	3	4	3	4	23
713	Twitter	Female	30's	Less than once a month	2	4	2	2	4	4	4	22
714	Twitter	Male	40's	Once a month	5	3	6	2	5	2	2	25
715	Twitter	Male	30's	Almost everyday	3	5	5	5	5	3	3	29
716	Twitter	Female	50's	Almost everyday	3	5	2	2	5	4	3	24
717	Twitter	Male	50's	Rarely	2	3	1	3	4	4	4	21
718	Twitter	Male	50's	Almost everyday	1	6	1	2	6	4	4	24
719	Twitter	Male	30's	Almost everyday	1	5	2	3	5	3	4	23
720	Twitter	Male	50's	Just created an account	5	5	5	5	5	3	3	31
721	Twitter	Male	40's	Once every few days	3	6	2	2	5	4	4	26
722	Twitter	Male	40's	Almost everyday	2	4	5	6	4	3	3	27
723	Twitter	Male	40's	Once every few days	3	5	2	3	5	3	3	24
724	Twitter	Male	30's	Almost everyday	3	5	3	5	4	5	5	30
725	Twitter	Female	30's	Once every few days	2	5	2	3	5	4	4	25
726	Twitter	Female	50's	Almost everyday	5	4	3	5	5	5	5	32
727	Twitter	Female	40's	Almost everyday	4	4	3	4	2	4	4	25
728	Twitter	Female	40's	Almost everyday	6	5	4	3	4	4	5	31
729	Twitter	Male	40's	Almost everyday	1	6	1	3	5	2	5	23
730	Twitter	Male	50's	Almost everyday	3	3	3	2	4	3	2	20
731	Twitter	Male	40's	Rarely	3	5	2	1	4	3	2	20
732	Twitter	Male	40's	Almost everyday	7	5	1	4	4	4	5	30
733	Twitter	Male	30's	Once a month	2	2	3	2	3	2	2	16
734	Twitter	Female	40's	Almost everyday	2	5	3	3	5	5	4	27
735	Twitter	Male	30's	Almost everyday	3	5	3	3	4	4	5	27
736	Twitter	Male	40's	Almost everyday	3	5	4	6	5	3	3	29
737	Twitter	Male	60's	Once every few days	6	6	6	6	6	6	5	41
738	Twitter	Female	50's	Once every few days	2	5	3	2	3	5	4	24
739	Twitter	Female	20's	Almost everyday	1	7	1	6	1	7	7	30
740	Twitter	Male	30's	Almost everyday	2	6	1	1	5	3	6	24
741	Twitter	Female	30's	Once every few days	6	3	2	2	6	4	3	26
742	Twitter	Female	40's	Almost everyday	3	4	3	4	4	3	5	26
743	Twitter	Male	40's	Once every few days	4	4	4	1	4	4	4	25
744	Twitter	Female	50's	Almost everyday	1	7	1	1	5	4	4	23
745	Twitter	Male	50's	Almost everyday	7	7	2	7	7	4	6	40
746	Twitter	Male	40's	Once every few days	2	4	3	4	4	4	4	25
747	Twitter	Male	30's	Once a month	7	7	1	7	1	6	7	36
748	Twitter	Male	40's	Once every few days	5	5	6	4	6	4	5	35
749	Twitter	Male	40's	Once every few days	3	5	2	5	5	4	5	29
750	Twitter	Male	40's	Less than once a month	4	4	4	4	4	4	4	28
751	Twitter	Male	60's	Almost everyday	5	3	4	4	4	4	4	28
752	Twitter	Female	20's	Once every few days	5	5	3	3	3	5	3	27
753	Twitter	Male	50's	Once every few days	5	5	4	5	3	3	4	29
754	Twitter	Male	30's	Rarely	1	4	1	3	4	4	4	21
755	Twitter	Male	50's	Once every few days	2	2	2	2	3	5	6	22
756	Twitter	Male	40's	Rarely	3	5	3	5	5	5	6	32
757	Twitter	Male	50's	Once every few days	5	4	3	4	4	4	4	28
758	Twitter	Male	50's	Once every few days	3	5	2	1	4	1	4	20
759	Twitter	Male	30's	Almost everyday	4	5	4	4	5	3	5	30
760	Twitter	Female	40's	Once every few days	3	3	1	1	5	3	5	21
761	Twitter	No answer	50's	Rarely	4	4	4	4	4	4	4	28
762	Twitter	Female	30's	Almost everyday	2	4	3	4	4	4	4	25
763	Twitter	Male	40's	Almost everyday	4	3	5	5	4	3	4	28
764	Twitter	Male	40's	Once a month	2	6	1	4	6	4	6	29
765	Twitter	Male	40's	Almost everyday	3	5	3	5	3	4	5	28
766	Twitter	Male	20's	Almost everyday	6	2	6	3	4	5	4	30
767	Twitter	Male	50's	Once every few days	2	5	2	2	3	2	5	21
768	Twitter	Male	40's	Almost everyday	3	6	4	3	6	4	3	29
769	Twitter	Female	30's	Almost everyday	5	2	3	4	5	4	2	25
770	Twitter	Male	50's	Once every few days	3	4	3	3	4	4	3	24
771	Twitter	Male	40's	Once every few days	3	4	2	2	3	2	4	20
772	Twitter	Male	60's	Rarely	4	4	4	4	4	4	4	28
773	Twitter	Male	40's	Once every few days	3	3	4	3	4	3	3	23
774	Twitter	Female	30's	Once every few days	6	4	6	2	5	4	4	31
775	Twitter	Female	30's	Almost everyday	3	5	3	3	5	3	5	27
776	Twitter	Male	30's	Once every few days	4	4	4	4	4	4	4	28
777	Twitter	Male	40's	Once a month	5	3	3	3	5	5	3	27
778	Twitter	Female	30's	Once every few days	1	5	1	1	5	1	3	17
779	Twitter	Female	30's	Just created an account	2	6	2	2	5	3	5	25
780	Twitter	Male	40's	Almost everyday	2	5	2	2	5	4	4	24
781	Twitter	Male	20's	Almost everyday	5	4	4	3	4	4	2	26
782	Twitter	Male	50's	Rarely	3	3	3	3	4	4	4	24
783	Twitter	Male	30's	Almost everyday	4	3	3	4	3	4	3	24
784	Twitter	Male	40's	Once every few days	5	2	6	3	3	5	3	27
785	Twitter	Male	30's	Once every few days	2	5	1	1	5	1	3	18
786	Twitter	Male	50's	Almost everyday	1	5	1	3	5	3	4	22
787	Twitter	Male	50's	Once every few days	3	5	3	3	3	2	2	21
788	Twitter	Female	30's	Almost everyday	2	5	2	2	4	3	5	23
789	Twitter	Female	30's	Almost everyday	3	5	4	4	4	3	5	28
790	Twitter	Male	40's	Almost everyday	5	4	3	5	4	4	5	30
791	Twitter	Female	30's	Once every few days	2	4	2	1	5	1	5	20
792	Twitter	Male	40's	Just created an account	4	5	3	3	3	3	3	24
793	Twitter	Male	40's	Once every few days	5	5	3	2	4	4	3	26
794	Twitter	Female	40's	Almost everyday	1	7	1	3	5	4	5	26
795	Twitter	Male	20's	Almost everyday	2	5	1	3	5	3	6	25
796	Twitter	Female	40's	Rarely	3	5	5	5	5	5	5	33
797	Twitter	Male	60's	Once a month	4	5	4	4	4	4	4	29
798	Twitter	Male	30's	Once every few days	5	5	3	3	2	4	5	27
799	Twitter	Male	40's	Once every few days	4	4	4	4	4	4	4	28
800	Twitter	Male	40's	Almost everyday	3	5	3	3	5	4	5	28
801	Twitter	Female	40's	Once a month	2	3	2	2	2	3	3	17
802	Twitter	Male	50's	Once every few days	4	3	3	4	4	4	2	24
803	Twitter	Male	30's	Almost everyday	3	5	3	4	4	4	4	27
804	Twitter	Male	50's	Almost everyday	5	2	3	4	2	4	1	21
805	Twitter	Female	50's	Once a month	4	5	3	5	4	5	5	31
806	Twitter	Male	40's	Almost everyday	3	4	4	3	3	3	4	24
807	Twitter	Male	40's	Almost everyday	2	3	3	4	4	4	4	24
808	Twitter	Male	40's	Once a month	5	6	6	6	3	5	3	34
809	Twitter	Male	40's	Almost everyday	2	4	3	2	4	4	4	23
810	Twitter	Male	30's	Almost everyday	1	7	1	1	7	1	6	24
811	Twitter	Female	40's	Once a month	4	4	4	3	4	4	4	27
812	Twitter	Male	50's	Once every few days	2	5	2	2	4	4	4	23
813	Twitter	Male	50's	Once a month	3	5	3	4	4	4	5	28
814	Twitter	Male	50's	Rarely	3	3	3	4	4	4	4	25
815	Twitter	Male	50's	Rarely	3	6	1	3	4	1	5	23
816	Twitter	Male	50's	Almost everyday	3	5	3	3	3	5	5	27
817	Twitter	Male	70's~	Once every few days	2	5	2	3	4	3	3	22
818	Twitter	Male	40's	Once a month	4	3	4	4	4	4	4	27
819	Twitter	Female	30's	Rarely	5	7	1	4	4	4	4	29
820	Twitter	Male	50's	Once every few days	1	1	2	3	2	3	3	15
821	Twitter	Male	40's	Almost everyday	3	6	1	1	5	2	5	23
822	Twitter	Male	40's	Rarely	4	4	4	4	4	4	4	28
823	Twitter	Male	40's	Almost everyday	3	5	4	3	5	5	6	31
824	Twitter	Male	40's	Almost everyday	2	5	1	1	4	2	4	19
825	Twitter	Male	40's	Once every few days	3	5	3	3	5	5	5	29
826	Twitter	Male	40's	Once every few days	3	6	3	3	5	2	6	28
827	Twitter	Male	40's	Once a month	3	5	4	4	5	3	4	28
828	Twitter	Male	30's	Almost everyday	5	3	2	1	4	1	4	20
829	Twitter	Male	40's	Rarely	2	5	3	2	4	3	4	23
830	Twitter	Female	40's	Once a month	5	4	5	3	6	5	2	30
831	Twitter	Male	40's	Just created an account	4	4	4	4	4	4	4	28
832	Twitter	Male	50's	Once a month	4	3	4	4	5	4	5	29
833	Twitter	Male	40's	Almost everyday	2	5	3	3	5	2	3	23
834	Twitter	Male	40's	Almost everyday	2	5	2	3	6	3	5	26
835	Twitter	Male	60's	Once a month	5	5	3	4	5	4	5	31
836	Twitter	Female	50's	Almost everyday	6	6	2	5	5	4	7	35
837	Twitter	Female	50's	Once every few days	2	5	2	2	6	4	5	26
838	Twitter	Female	30's	Rarely	4	4	4	3	4	4	4	27
839	Twitter	Female	30's	Just created an account	1	1	1	1	1	1	7	13
840	Twitter	Male	50's	Almost everyday	5	5	3	4	4	4	4	29
841	Twitter	Male	60's	Once every few days	5	5	4	5	5	4	5	33
842	Twitter	Male	60's	Almost everyday	6	5	5	6	5	6	6	39
843	Twitter	Female	40's	Rarely	1	6	2	1	5	2	4	21
844	Twitter	Male	40's	Once every few days	3	1	7	1	7	1	1	21
845	Twitter	Female	50's	Once every few days	1	6	1	4	5	3	4	24
846	Twitter	Male	30's	Almost everyday	1	7	1	1	7	3	5	25
847	Twitter	Female	70's~	Almost everyday	2	6	2	5	5	3	3	26
848	Twitter	Male	40's	Less than once a month	4	3	5	3	5	3	3	26
849	Twitter	Male	40's	Almost everyday	2	5	2	3	2	4	5	23
850	Twitter	Female	50's	Almost everyday	3	5	2	4	5	5	5	29
851	Twitter	Female	50's	Rarely	2	3	3	2	4	4	4	22
852	Twitter	Male	60's	Once every few days	5	5	4	5	5	5	6	35
853	Twitter	Female	40's	Once every few days	3	5	3	3	4	4	4	26
854	Twitter	Male	30's	Almost everyday	2	4	4	4	4	4	4	26
855	Twitter	Male	50's	Almost everyday	3	6	2	3	5	2	5	26
856	Twitter	Male	30's	Almost everyday	3	6	3	2	5	2	6	27
857	Twitter	Male	60's	Once every few days	6	5	3	5	5	5	5	34
858	Twitter	Female	30's	Almost everyday	7	2	5	2	5	3	3	27
859	Twitter	Male	50's	Once every few days	5	1	6	6	3	4	5	30
860	Twitter	Female	40's	Almost everyday	2	5	2	1	5	2	4	21
861	Twitter	Male	40's	Almost everyday	5	5	3	3	3	3	4	26
862	Twitter	Female	60's	Once every few days	4	4	4	4	4	4	4	28
863	Twitter	Male	30's	Just created an account	1	3	3	3	5	4	5	24
864	Twitter	Female	40's	Just created an account	4	5	5	4	4	4	3	29
865	Twitter	Male	40's	Almost everyday	3	4	2	1	4	4	4	22
866	Twitter	Male	30's	Once every few days	6	3	6	4	6	3	4	32
867	Twitter	Female	20's	Almost everyday	6	2	6	2	6	2	2	26
868	Twitter	Female	40's	Almost everyday	5	5	3	4	3	4	2	26
869	Twitter	Female	40's	Almost everyday	4	4	4	4	4	4	4	28
870	Twitter	Male	40's	Once a month	5	5	5	5	5	3	3	31
871	Twitter	Male	50's	Once a month	5	4	3	2	2	4	3	23
872	Twitter	Female	20's	Once every few days	3	4	4	3	4	4	4	26
873	Twitter	Male	40's	Just created an account	4	4	4	4	4	4	4	28
874	Twitter	Female	50's	Rarely	5	3	5	3	4	5	3	28
875	Twitter	Male	30's	Almost everyday	2	6	2	4	4	3	4	25
876	Twitter	Male	40's	Almost everyday	4	4	4	4	4	4	4	28
877	Twitter	Male	40's	Almost everyday	6	3	5	4	5	4	5	32
878	Twitter	Male	30's	Almost everyday	4	5	3	3	4	4	4	27
879	Twitter	Female	30's	Almost everyday	1	2	1	4	5	1	2	16
880	Twitter	Male	40's	Once every few days	5	3	4	3	6	2	2	25
881	Twitter	Female	30's	Almost everyday	4	4	4	4	4	4	4	28
882	Twitter	Male	30's	Almost everyday	2	5	2	4	5	4	5	27
883	Twitter	Male	40's	Almost everyday	4	5	4	3	5	4	5	30
884	Twitter	Male	50's	Rarely	3	5	4	3	4	3	5	27
885	Twitter	Male	40's	Once every few days	5	6	5	5	5	7	5	38
886	Twitter	Male	40's	Rarely	2	5	4	3	5	3	5	27
887	Twitter	Male	40's	Once every few days	2	6	4	5	3	5	6	31
888	Twitter	Male	50's	Almost everyday	5	3	4	3	5	4	4	28
889	Twitter	Female	50's	Almost everyday	3	4	3	1	4	3	4	22
890	Twitter	Male	20's	Almost everyday	3	5	2	3	5	4	4	26
891	Twitter	Male	50's	Rarely	3	3	3	3	3	4	5	24
892	Twitter	Male	40's	Less than once a month	2	5	1	1	3	2	4	18
893	Twitter	Female	40's	Rarely	2	6	6	2	3	4	4	27
894	Twitter	Male	50's	Almost everyday	4	3	3	5	4	4	3	26
895	Twitter	Male	50's	Almost everyday	6	2	6	2	6	3	2	27
896	Twitter	Female	60's	Once every few days	2	6	1	4	5	6	5	29
897	Twitter	Male	20's	Almost everyday	1	4	5	3	4	5	2	24
898	Twitter	Male	30's	Almost everyday	4	5	4	4	5	4	4	30
899	Twitter	Male	50's	Once a month	3	5	3	2	2	2	2	19
900	Twitter	Female	50's	Once every few days	2	4	3	3	4	3	5	24
901	Twitter	Male	40's	Almost everyday	2	4	3	2	4	2	4	21
902	Twitter	Male	30's	Almost everyday	4	4	4	4	4	4	4	28
903	Twitter	Male	30's	Almost everyday	6	5	5	3	4	4	3	30
904	Twitter	Male	30's	Almost everyday	2	5	3	4	5	4	5	28
905	Twitter	Female	40's	Almost everyday	5	5	5	4	5	5	5	34
906	Twitter	Male	30's	Almost everyday	2	5	3	2	5	2	4	23
907	Twitter	Female	20's	Once every few days	2	3	2	4	5	6	3	25
908	Twitter	Male	30's	Less than once a month	3	4	4	4	3	5	5	28
909	Twitter	Male	50's	Once a month	3	3	3	3	3	2	2	19
910	Twitter	Female	60's	Rarely	3	5	3	4	2	3	2	22
911	Twitter	Male	40's	Almost everyday	6	5	3	2	6	2	5	29
912	Twitter	Female	30's	Almost everyday	4	4	5	4	4	4	3	28
913	Twitter	Male	50's	Once every few days	6	2	3	3	4	5	2	25
914	Twitter	Male	50's	Once a month	4	5	4	5	3	4	4	29
915	Twitter	Male	40's	Once a month	6	4	6	3	6	4	3	32
916	Twitter	Female	60's	Once every few days	4	2	4	2	3	2	5	22
917	Twitter	Male	30's	Once every few days	3	4	3	4	5	3	4	26
918	Twitter	Female	40's	Almost everyday	4	1	4	1	7	1	1	19
919	Twitter	Female	20's	Almost everyday	4	5	3	3	4	4	4	27
920	Twitter	Female	20's	Almost everyday	4	5	3	2	4	4	4	26
921	Twitter	Male	60's	Rarely	3	3	4	4	5	3	4	26
922	Twitter	Male	50's	Almost everyday	4	4	4	4	5	3	3	27
923	Twitter	Male	50's	Once every few days	5	3	6	3	6	3	4	30
924	Twitter	Male	40's	Once a month	6	2	5	5	4	5	7	34
925	Twitter	Male	50's	Once every few days	5	4	4	3	5	3	4	28
926	Twitter	Male	40's	Rarely	5	3	4	4	4	4	4	28
927	Twitter	Female	50's	Almost everyday	3	5	3	3	6	4	2	26
928	Twitter	Male	30's	Less than once a month	4	3	3	4	4	3	3	24
929	Twitter	Female	30's	Almost everyday	2	2	2	2	2	3	3	16
930	Twitter	Male	60's	Almost everyday	1	1	2	1	2	2	4	13
931	Twitter	Male	40's	Once every few days	6	3	6	3	5	3	2	28
932	Twitter	Male	40's	Once every few days	2	6	3	2	5	2	4	24
933	Twitter	Male	60's	Almost everyday	3	5	3	3	4	3	4	25
934	Twitter	Female	50's	Less than once a month	4	5	2	3	5	5	6	30
935	Twitter	Male	40's	Almost everyday	6	2	6	5	7	5	6	37
936	Twitter	Male	40's	Once every few days	3	5	3	3	4	4	4	26
937	Twitter	Male	30's	Once every few days	1	5	2	1	5	3	5	22
938	Twitter	Female	60's	Rarely	2	2	2	2	3	3	3	17
939	Twitter	Male	40's	Once every few days	3	3	3	4	3	3	4	23
940	Twitter	Male	30's	Almost everyday	5	3	6	2	4	2	3	25
941	Twitter	Female	50's	Almost everyday	3	6	2	2	3	2	4	22
942	Twitter	Female	30's	Almost everyday	4	4	4	4	3	4	4	27
943	Twitter	Male	40's	Once a month	1	7	1	1	4	4	5	23
944	Twitter	Female	20's	Rarely	2	3	3	2	3	6	2	21
945	Twitter	Male	30's	Once every few days	6	6	3	5	4	2	5	31
946	Twitter	Male	50's	Once every few days	6	4	3	6	5	2	6	32
947	Twitter	Female	40's	Once a month	5	4	5	3	5	3	3	28
948	Twitter	Male	60's	Rarely	3	3	2	3	4	3	4	22
949	Twitter	Female	50's	Almost everyday	5	3	5	4	4	4	4	29
950	Twitter	Male	50's	Almost everyday	3	5	3	4	5	4	5	29
951	Twitter	Male	30's	Rarely	3	5	2	3	5	3	6	27
952	Twitter	Male	60's	Rarely	2	5	2	2	5	2	2	20
953	Twitter	Male	50's	Once every few days	7	1	2	2	2	5	4	23
954	Twitter	Male	40's	Once every few days	5	4	3	4	4	4	3	27
955	Twitter	Male	40's	Almost everyday	7	5	6	5	7	6	5	41
956	Twitter	Male	50's	Once every few days	5	5	3	4	3	3	5	28
957	Twitter	Male	40's	Once every few days	4	4	4	3	4	4	4	27
958	Twitter	Male	50's	Almost everyday	5	5	5	4	4	4	4	31
959	Twitter	Male	30's	Almost everyday	5	4	4	4	5	4	4	30
960	Twitter	Female	50's	Once every few days	6	3	3	4	5	3	4	28
961	Twitter	Male	50's	Less than once a month	3	3	3	3	3	5	5	25
962	Twitter	Male	20's	Almost everyday	7	2	5	4	4	3	3	28
963	Twitter	Male	50's	Almost everyday	3	4	3	3	4	4	5	26
964	Twitter	Male	40's	Almost everyday	1	4	4	3	4	4	4	24
965	Twitter	Female	50's	Once every few days	6	2	4	2	5	3	2	24
966	Twitter	Male	50's	Almost everyday	3	1	4	1	1	4	1	15
967	Twitter	Male	30's	Almost everyday	2	2	1	3	1	3	3	15
968	Twitter	Male	30's	Almost everyday	2	3	2	1	4	4	3	19
969	Twitter	Male	60's	Once every few days	3	6	3	2	3	2	4	23
970	Twitter	Male	40's	Rarely	2	4	3	2	4	3	4	22
971	Twitter	Male	40's	Once every few days	4	5	4	4	5	4	4	30
972	Twitter	Male	50's	Once every few days	4	3	2	5	2	5	2	23
973	Twitter	Female	30's	Almost everyday	4	5	5	3	5	4	5	31
974	Twitter	Male	60's	Less than once a month	2	5	2	4	2	5	4	24
975	Twitter	Male	50's	Once every few days	3	5	3	4	4	5	5	29
976	Twitter	Female	40's	Rarely	1	6	2	4	4	4	5	26
977	Twitter	Male	40's	Just created an account	4	4	4	4	4	4	4	28
978	Twitter	Female	30's	Almost everyday	2	5	2	3	4	4	4	24
979	Twitter	Female	40's	Rarely	3	3	3	3	3	3	3	21
980	Twitter	Male	40's	Rarely	2	5	2	3	5	3	4	24
981	Twitter	Male	30's	Just created an account	7	1	7	1	3	3	1	23
982	Twitter	Female	30's	Almost everyday	2	3	1	2	5	4	3	20
983	Twitter	Female	20's	Almost everyday	2	6	2	3	4	5	5	27
984	Twitter	Female	50's	Rarely	4	6	3	4	5	3	5	30
985	Twitter	Male	30's	Just created an account	6	5	5	4	4	4	5	33
986	Twitter	Male	10's	Almost everyday	7	1	7	1	7	1	1	25
987	Twitter	Male	40's	Less than once a month	3	5	3	4	4	3	3	25
988	Twitter	Male	30's	Once every few days	3	3	3	6	5	2	7	29
989	Twitter	Female	30's	Almost everyday	2	5	2	2	3	3	5	22
990	Twitter	Female	40's	Almost everyday	3	5	2	5	4	5	6	30
991	Twitter	Female	50's	Once every few days	4	4	4	4	4	4	4	28
992	Twitter	Female	30's	Less than once a month	5	7	2	4	5	4	4	31
993	Twitter	Male	40's	Once a month	3	5	5	4	5	4	5	31
994	Twitter	Male	40's	Rarely	2	5	2	1	6	4	4	24
995	Twitter	Male	40's	Once every few days	2	6	3	1	2	2	3	19
996	Twitter	Female	30's	Almost everyday	3	4	6	3	5	5	2	28
997	Twitter	Male	30's	Less than once a month	5	2	7	3	6	2	2	27
998	Twitter	Female	20's	Almost everyday	3	4	3	3	3	4	4	24
999	Twitter	Male	30's	Almost everyday	3	5	3	3	5	3	5	27
1000	Twitter	Female	40's	Once every few days	5	5	4	3	4	4	4	29
1001	Twitter	Male	40's	Almost everyday	3	7	2	3	5	3	7	30
1002	Twitter	Female	30's	Almost everyday	3	5	4	2	6	5	7	32
1003	Twitter	Male	40's	Almost everyday	4	4	4	2	2	6	4	26
1004	Twitter	Male	30's	Almost everyday	5	4	3	1	4	4	3	24
1005	Twitter	Female	30's	Less than once a month	6	5	5	5	4	4	3	32
1006	Twitter	Male	20's	Almost everyday	7	1	7	1	7	6	6	35
1007	Twitter	Male	40's	Almost everyday	5	3	4	4	4	4	3	27
1008	Twitter	Male	50's	Less than once a month	1	3	1	3	4	4	5	21
1009	Twitter	Male	50's	Rarely	6	3	3	1	6	3	5	27
1010	Twitter	Female	20's	Rarely	4	5	3	3	5	4	6	30
1011	Twitter	Female	20's	Almost everyday	4	4	4	4	4	4	4	28
1012	Twitter	Female	20's	Almost everyday	3	5	3	4	5	3	4	27
1013	Twitter	Female	30's	Once a month	5	4	4	2	4	4	5	28
1014	Twitter	Male	20's	Almost everyday	5	2	4	4	4	3	3	25
1015	Twitter	Male	30's	Just created an account	4	4	4	4	4	4	4	28
1016	Twitter	Male	60's	Almost everyday	3	5	2	3	5	3	5	26
1017	Twitter	Male	40's	Almost everyday	4	4	4	4	4	4	4	28
1018	Twitter	Female	30's	Once every few days	4	3	5	4	3	5	5	29
1019	Twitter	Female	30's	Once a month	3	4	3	3	3	3	4	23
1020	Twitter	No answer	40's	Once every few days	1	4	2	1	5	3	4	20
1021	Twitter	Female	30's	Almost everyday	2	7	2	2	7	4	6	30
1022	Twitter	Female	30's	Almost everyday	5	5	5	5	5	5	5	35
1023	Twitter	Female	40's	Rarely	3	3	3	1	2	2	2	16
1024	Twitter	Male	30's	Rarely	2	5	3	1	4	1	5	21
1025	Twitter	Male	40's	Once every few days	3	6	2	3	4	2	4	24
1026	Twitter	Male	40's	Once a month	3	5	3	3	5	5	5	29
1027	Twitter	Female	30's	Almost everyday	2	7	2	3	6	3	5	28
1028	Twitter	Male	50's	Rarely	1	1	1	1	1	1	4	10
1029	Twitter	Male	30's	Once every few days	2	5	1	2	2	1	4	17
1030	Twitter	Female	30's	Almost everyday	6	5	4	2	5	4	3	29
1031	Twitter	Female	50's	Just created an account	4	5	4	5	6	2	4	30
1032	Twitter	Male	50's	Less than once a month	5	6	3	5	5	4	5	33
1033	Twitter	Female	40's	Almost everyday	2	5	1	3	2	2	1	16
1034	Twitter	Male	60's	Rarely	4	4	3	3	4	4	4	26
1035	Twitter	Female	50's	Once every few days	5	4	5	5	5	4	5	33
1036	Twitter	Male	40's	Rarely	4	2	2	2	2	2	2	16
1037	Twitter	Male	40's	Just created an account	2	2	2	1	2	2	1	12
1038	Twitter	Male	40's	Almost everyday	3	4	3	3	4	1	4	22
1039	Twitter	Female	60's	Almost everyday	6	4	4	4	3	5	4	30
1040	Twitter	Male	40's	Rarely	6	4	3	3	4	4	3	27
1041	Twitter	Female	40's	Almost everyday	3	5	3	4	4	5	5	29
1042	Twitter	Female	30's	Almost everyday	2	5	2	3	3	3	6	24
1043	Twitter	Male	30's	Once every few days	2	5	7	4	5	5	3	31
1044	Twitter	Male	50's	Almost everyday	4	4	4	4	4	4	4	28
1045	Twitter	Male	30's	Once every few days	5	4	6	3	4	3	4	29
1046	Twitter	Male	30's	Just created an account	4	5	4	5	5	4	4	31
1047	Twitter	Male	20's	Once every few days	6	1	6	1	6	2	2	24
1048	Twitter	No answer	20's	Almost everyday	4	3	3	4	5	4	3	26
1049	Twitter	Female	30's	Almost everyday	3	3	5	3	4	1	4	23
1050	Twitter	Male	40's	Once every few days	4	5	3	3	4	3	4	26
1051	Twitter	Male	50's	Once every few days	6	3	4	4	4	5	5	31
1052	Twitter	Male	40's	Rarely	3	3	3	3	3	3	5	23
1053	Twitter	Male	30's	Less than once a month	2	5	2	2	5	4	5	25
1054	Twitter	Female	30's	Once every few days	3	5	4	4	4	4	4	28
1055	Twitter	Male	40's	Almost everyday	4	5	3	4	4	4	3	27
1056	Twitter	Male	40's	Less than once a month	6	5	4	4	3	2	4	28
1057	Twitter	Female	50's	Rarely	3	5	2	4	6	4	5	29
1058	Twitter	Male	50's	Rarely	3	5	3	3	4	3	5	26
1059	Twitter	Male	40's	Once a month	4	4	4	4	4	4	4	28
1060	Twitter	Male	50's	Less than once a month	4	5	5	5	5	5	5	34
1061	Twitter	Male	50's	Almost everyday	3	4	3	3	5	4	5	27
1062	Twitter	Male	40's	Almost everyday	3	5	3	4	4	3	5	27
1063	Twitter	Male	40's	Almost everyday	2	5	2	3	5	3	5	25
1064	Twitter	Male	30's	Once every few days	3	5	5	4	5	2	1	25
1065	Twitter	Male	50's	Once every few days	4	5	2	4	4	4	4	27
1066	Twitter	Male	40's	Once every few days	4	5	5	4	5	4	4	31
1067	Twitter	Male	40's	Almost everyday	3	5	3	1	5	3	4	24
1068	Twitter	Male	60's	Almost everyday	6	3	5	5	4	4	4	31
1069	Twitter	Male	20's	Less than once a month	4	2	6	2	5	2	2	23
1070	Twitter	Male	30's	Almost everyday	3	6	5	5	6	2	5	32
1071	Twitter	Male	40's	Almost everyday	3	3	2	2	2	2	2	16
1072	Twitter	Female	30's	Almost everyday	3	6	2	3	5	4	4	27
1073	Twitter	Male	40's	Once every few days	1	5	1	1	5	3	3	19
1074	Twitter	Male	30's	Almost everyday	3	5	1	4	6	6	6	31
1075	Twitter	Male	40's	Rarely	3	3	3	3	3	3	3	21
1076	Twitter	Male	40's	Almost everyday	6	3	3	3	5	4	4	28
1077	Twitter	Male	50's	Almost everyday	4	5	3	4	5	4	4	29
1078	Twitter	Male	40's	Almost everyday	4	4	4	4	4	4	4	28
1079	Twitter	Male	40's	Almost everyday	6	4	3	4	4	4	4	29
1080	Twitter	Male	40's	Rarely	4	5	4	4	4	4	4	29
1081	Twitter	Male	50's	Rarely	2	4	2	3	4	4	4	23
1082	Twitter	Male	20's	Almost everyday	4	5	2	4	3	3	4	25
1083	Twitter	Male	40's	Once every few days	4	4	4	4	4	4	4	28
1084	Twitter	Female	40's	Almost everyday	7	1	7	3	5	2	3	28
1085	Twitter	Male	30's	Once every few days	3	5	3	3	5	3	4	26
1086	Twitter	Male	30's	Rarely	3	5	3	4	5	3	5	28
1087	Twitter	Male	30's	Once a month	4	3	3	2	3	2	2	19
1088	Twitter	Male	50's	Rarely	4	4	4	3	4	4	4	27
1089	Twitter	Male	70's~	Rarely	3	6	3	3	5	4	5	29
1090	Twitter	Male	40's	Almost everyday	2	5	2	1	4	2	5	21
1091	Twitter	Female	60's	Almost everyday	4	6	3	5	5	3	5	31
1092	Twitter	Female	20's	Almost everyday	5	5	2	4	5	4	6	31
1093	Twitter	Male	40's	Once every few days	3	6	1	2	4	3	5	24
1094	Twitter	Female	20's	Almost everyday	1	7	1	1	4	4	4	22
1095	Twitter	Male	30's	Rarely	4	2	5	4	5	4	3	27
1096	Twitter	Male	40's	Rarely	7	5	3	3	5	3	3	29
1097	Twitter	Male	50's	Once a month	4	5	3	4	4	4	4	28
1098	Twitter	Male	40's	Once every few days	2	6	2	2	5	3	5	25
1099	Twitter	Male	30's	Once a month	4	2	6	3	4	4	4	27
1100	Twitter	Male	50's	Rarely	2	5	2	1	6	6	6	28
1101	Twitter	Male	60's	Once every few days	3	5	2	1	6	3	4	24
1102	Twitter	Male	60's	Rarely	4	3	3	4	4	4	4	26
1103	Twitter	Female	50's	Once a month	2	5	3	3	5	4	5	27
1104	Twitter	Female	40's	Almost everyday	6	4	3	4	3	4	6	30
1105	Twitter	Female	50's	Once every few days	2	5	3	2	5	5	4	26
1106	Twitter	Female	30's	Almost everyday	3	3	4	5	4	4	3	26
1107	Twitter	Male	40's	Almost everyday	4	4	4	4	4	4	4	28
1108	Twitter	Female	20's	Once every few days	4	5	2	1	4	3	4	23
1109	Twitter	Male	20's	Rarely	5	2	5	3	5	3	3	26
1110	Twitter	Female	30's	Almost everyday	2	5	2	3	4	3	5	24
1111	Twitter	Female	30's	Almost everyday	2	5	3	4	5	3	4	26
1112	Twitter	Female	60's	Rarely	3	4	3	4	4	4	4	26
1113	Twitter	Male	40's	Less than once a month	4	5	5	4	5	5	5	33
1114	Twitter	Male	40's	Just created an account	5	1	1	1	1	1	1	11
1115	Twitter	Male	40's	Once every few days	3	6	4	4	5	5	5	32
1116	Twitter	Female	40's	Almost everyday	1	7	1	1	7	5	4	26
1117	Twitter	Female	30's	Once every few days	3	4	3	3	4	3	3	23
1118	Twitter	Male	20's	Almost everyday	5	3	6	2	5	2	2	25
1119	Twitter	Male	20's	Rarely	3	5	3	5	3	4	4	27
1120	Twitter	Female	70's~	Rarely	2	5	5	4	5	4	4	29
1121	Twitter	Male	40's	Rarely	3	5	5	4	6	4	4	31
1122	Twitter	Female	30's	Once every few days	4	6	4	4	5	4	5	32
1123	Twitter	Female	40's	Almost everyday	3	5	3	2	6	3	5	27
1124	Twitter	Male	30's	Once every few days	6	5	2	5	4	3	4	29
1125	Twitter	Female	40's	Just created an account	2	3	1	2	5	4	4	21
1126	Twitter	Male	40's	Once every few days	1	1	1	1	2	1	1	8
1127	Twitter	No answer	40's	Almost everyday	3	5	2	4	4	4	5	27
1128	Twitter	Female	50's	Just created an account	4	2	1	1	4	3	2	17
1129	Twitter	Male	40's	Almost everyday	2	5	2	3	5	3	5	25
1130	Twitter	Female	30's	Almost everyday	4	5	3	3	5	3	4	27
1131	Twitter	Male	40's	Almost everyday	2	5	2	3	5	3	5	25
1132	Twitter	Female	40's	Almost everyday	2	6	2	1	6	3	5	25
1133	Twitter	Female	40's	Once every few days	4	3	5	4	5	4	4	29
1134	Twitter	Male	40's	Once a month	5	3	5	3	5	3	3	27
1135	Twitter	Female	40's	Once a month	3	5	4	4	5	3	5	29
1136	Twitter	Male	60's	Less than once a month	2	3	2	2	2	6	5	22
1137	Twitter	Male	40's	Almost everyday	4	5	3	4	5	4	4	29
1138	Twitter	Male	40's	Once a month	3	5	2	3	6	3	5	27
1139	Twitter	Male	50's	Just created an account	7	1	7	1	7	1	1	25
1140	Twitter	Male	40's	Almost everyday	6	4	4	4	3	3	4	28
1141	Twitter	Female	40's	Rarely	4	5	3	5	6	3	4	30
1142	Twitter	Female	40's	Once every few days	1	4	4	1	1	2	4	17
1143	Twitter	Male	50's	Once every few days	5	3	2	3	3	4	3	23
1144	Twitter	Male	30's	Rarely	7	1	7	4	4	4	5	32
1145	Twitter	Male	30's	Just created an account	3	5	2	3	4	3	5	25
1146	Twitter	Male	30's	Almost everyday	4	4	4	4	4	4	4	28
1147	Twitter	Female	40's	Rarely	4	5	3	4	6	4	4	30
1148	Twitter	Male	40's	Rarely	5	4	5	4	5	4	5	32
1149	Twitter	Male	20's	Rarely	2	6	1	3	2	6	6	26
1150	Twitter	Female	40's	Almost everyday	3	4	2	4	5	3	5	26
1151	Twitter	Female	30's	Less than once a month	5	5	2	4	4	4	3	27
1152	Twitter	Male	40's	Once a month	6	4	4	5	4	4	4	31
1153	Twitter	No answer	40's	Rarely	7	1	7	1	7	1	1	25
1154	Twitter	Female	30's	Almost everyday	2	4	5	6	5	5	4	31
1155	Twitter	Female	30's	Rarely	2	5	3	3	5	6	5	29
1156	Twitter	Male	30's	Once every few days	2	4	3	2	4	2	4	21
1157	Twitter	Male	30's	Once every few days	1	5	3	4	6	5	1	25
1158	Twitter	Male	30's	Almost everyday	1	7	1	6	5	2	4	26
1159	Twitter	Female	40's	Once every few days	2	2	2	2	2	2	5	17
1160	Twitter	Male	30's	Once every few days	3	5	2	3	5	2	5	25
1161	Twitter	Male	30's	Almost everyday	2	3	3	2	4	4	4	22
1162	Twitter	Female	50's	Rarely	3	5	3	4	5	4	5	29
1163	Twitter	Male	30's	Almost everyday	6	4	3	5	6	2	2	28
1164	Twitter	Female	30's	Rarely	2	4	4	3	6	4	5	28
1165	Twitter	Male	40's	Once every few days	6	2	5	3	5	3	3	27
1166	Twitter	Male	30's	Almost everyday	5	5	2	6	6	5	3	32
1167	Twitter	Female	30's	Once every few days	3	6	3	3	4	2	4	25
1168	Twitter	Male	40's	Once every few days	3	5	3	4	5	3	5	28
1169	Twitter	Male	40's	Almost everyday	6	3	5	6	3	4	3	30
1170	Twitter	Female	20's	Almost everyday	7	7	7	2	6	7	7	43
1171	Twitter	Male	30's	Almost everyday	6	7	2	1	6	2	4	28
1172	Twitter	Male	40's	Almost everyday	7	1	7	1	7	1	1	25
1173	Twitter	Female	40's	Once every few days	3	4	2	4	4	4	5	26
1174	Twitter	Female	20's	Once every few days	2	5	2	2	4	4	4	23
1175	Twitter	Male	60's	Once every few days	6	4	6	6	6	3	5	36
1176	Twitter	Male	50's	Almost everyday	4	4	2	2	1	3	3	19
1177	Twitter	Male	50's	Almost everyday	6	2	4	5	3	6	3	29
1178	Twitter	Female	20's	Once every few days	2	6	2	4	6	4	5	29
1179	Twitter	Male	30's	Just created an account	2	2	2	2	3	3	5	19
1180	Twitter	Female	30's	Once every few days	3	6	3	2	6	3	6	29
1181	Twitter	Male	40's	Once a month	6	5	3	5	3	5	5	32
1182	Twitter	Male	60's	Almost everyday	3	4	2	5	3	4	5	26
1183	Twitter	Male	60's	Once a month	5	5	3	4	5	3	3	28
1184	Twitter	Male	40's	Almost everyday	4	4	4	3	4	4	4	27
1185	Twitter	Female	40's	Just created an account	2	5	1	1	6	2	4	21
1186	Twitter	Female	50's	Almost everyday	5	6	5	6	6	5	5	38
1187	Twitter	Male	20's	Almost everyday	2	5	3	5	3	5	5	28
1188	Twitter	Male	20's	Rarely	5	5	5	3	5	3	4	30
1189	Twitter	Female	40's	Almost everyday	6	5	3	4	6	3	3	30
1190	Twitter	Male	50's	Almost everyday	1	6	1	3	5	2	5	23
1191	Twitter	Male	20's	Almost everyday	6	6	2	2	6	4	7	33
1192	Twitter	Female	30's	Once a month	2	5	2	2	4	3	3	21
1193	Twitter	Male	50's	Almost everyday	2	2	2	2	2	2	3	15
1194	Twitter	Female	20's	Almost everyday	2	6	2	1	3	3	6	23
1195	Twitter	Female	40's	Rarely	3	4	3	3	4	4	4	25
1196	Twitter	Male	30's	Almost everyday	2	5	3	3	4	4	4	25
1197	Twitter	Female	60's	Once every few days	5	4	5	5	3	5	5	32
1198	Twitter	Female	30's	Almost everyday	2	5	3	3	6	5	5	29
1199	Facebook	Male	40's	Once a month	4	4	4	2	4	4	4	26
1200	Facebook	Male	50's	Once every few days	4	3	4	2	4	4	3	24
1201	Facebook	Male	40's	Just created an account	4	5	3	3	5	4	4	28
1202	Facebook	Female	40's	Once every few days	2	5	5	1	3	3	6	25
1203	Facebook	Male	30's	Rarely	2	4	4	3	3	4	4	24
1204	Facebook	Female	40's	Rarely	3	5	3	2	5	4	5	27
1205	Facebook	Male	40's	Almost everyday	2	6	2	2	5	1	3	21
1206	Facebook	Male	40's	Rarely	5	4	3	4	3	4	5	28
1207	Facebook	Male	50's	Once every few days	3	4	3	3	4	4	3	24
1208	Facebook	Male	50's	Once a month	3	4	3	3	4	3	5	25
1209	Facebook	Male	40's	Once a month	6	4	6	5	5	5	4	35
1210	Facebook	Female	50's	Once every few days	1	5	3	1	3	5	5	23
1211	Facebook	Male	50's	Almost everyday	4	4	4	4	4	4	5	29
1212	Facebook	Male	50's	Once a month	2	4	2	1	4	4	4	21
1213	Facebook	Male	50's	Less than once a month	3	3	4	5	5	3	5	28
1214	Facebook	Male	50's	Rarely	5	3	3	4	5	4	4	28
1215	Facebook	Male	40's	Rarely	3	5	4	4	5	3	4	28
1216	Facebook	Male	50's	Once a month	2	4	3	3	4	4	4	24
1217	Facebook	Male	40's	Almost everyday	4	4	4	4	4	4	4	28
1218	Facebook	Male	50's	Once every few days	5	4	4	3	4	4	4	28
1219	Facebook	Male	50's	Almost everyday	7	3	2	4	5	4	4	29
1220	Facebook	Male	50's	Once every few days	4	5	5	4	3	5	4	30
1221	Facebook	Male	50's	Rarely	4	3	5	3	5	4	3	27
1222	Facebook	Female	30's	Rarely	1	7	1	1	7	4	7	28
1223	Facebook	Male	40's	Once a month	5	5	3	3	5	3	5	29
1224	Facebook	Female	30's	Rarely	1	2	1	2	3	3	4	16
1225	Facebook	Male	50's	Rarely	4	4	4	4	4	4	4	28
1226	Facebook	Female	30's	Once every few days	2	6	2	4	4	3	5	26
1227	Facebook	Female	40's	Once a month	2	4	3	2	5	4	5	25
1228	Facebook	Male	40's	Once a month	7	2	5	1	6	3	2	26
1229	Facebook	Male	40's	Less than once a month	4	4	4	4	4	4	4	28
1230	Facebook	Female	40's	Once every few days	2	2	3	4	3	3	5	22
1231	Facebook	Female	40's	Once every few days	4	5	3	4	4	5	5	30
1232	Facebook	Female	40's	Almost everyday	3	3	3	2	3	3	2	19
1233	Facebook	Male	40's	Rarely	5	5	4	2	4	4	4	28
1234	Facebook	Male	40's	Once every few days	6	2	5	2	5	3	2	25
1235	Facebook	Female	60's	Less than once a month	4	3	4	3	5	4	3	26
1236	Facebook	Male	50's	Almost everyday	1	2	1	2	3	2	3	14
1237	Facebook	Male	50's	Once every few days	7	1	6	5	4	5	5	33
1238	Facebook	Female	40's	Almost everyday	1	5	3	1	2	1	5	18
1239	Facebook	Female	40's	Almost everyday	5	6	5	3	5	3	6	33
1240	Facebook	Male	40's	Rarely	1	5	3	1	4	4	4	22
1241	Facebook	Male	50's	Once every few days	7	3	3	3	4	4	3	27
1242	Facebook	Male	40's	Rarely	4	4	4	4	4	4	4	28
1243	Facebook	Female	40's	Once a month	6	3	3	2	3	3	2	22
1244	Facebook	Male	50's	Once every few days	5	4	5	5	4	5	3	31
1245	Facebook	Female	40's	Almost everyday	4	4	4	4	4	4	4	28
1246	Facebook	Male	50's	Almost everyday	3	5	3	4	3	5	5	28
1247	Facebook	Male	30's	Almost everyday	6	6	3	5	6	5	6	37
1248	Facebook	Female	40's	Just created an account	4	5	3	4	5	4	4	29
1249	Facebook	Male	50's	Once a month	2	4	2	2	4	5	2	21
1250	Facebook	Male	40's	Once every few days	4	4	3	3	4	4	3	25
1251	Facebook	Male	40's	Just created an account	4	4	4	1	4	4	4	25
1252	Facebook	Male	30's	Once a month	7	3	6	3	6	2	3	30
1253	Facebook	Male	30's	Rarely	2	5	4	3	4	4	4	26
1254	Facebook	Male	50's	Almost everyday	5	5	5	5	6	5	6	37
1255	Facebook	Male	40's	Once every few days	5	3	4	3	4	4	4	27
1256	Facebook	Male	30's	Rarely	1	7	1	4	5	1	6	25
1257	Facebook	Male	40's	Rarely	5	3	4	5	5	3	4	29
1258	Facebook	Female	30's	Once every few days	3	5	2	3	4	4	4	25
1259	Facebook	Male	30's	Rarely	3	2	5	3	3	4	3	23
1260	Facebook	Female	30's	Less than once a month	3	4	4	4	3	5	5	28
1261	Facebook	Male	40's	Less than once a month	3	3	2	2	3	5	5	23
1262	Facebook	Male	40's	Less than once a month	3	2	6	4	5	3	5	28
1263	Facebook	Male	40's	Almost everyday	3	5	4	4	5	4	5	30
1264	Facebook	Male	50's	Less than once a month	3	4	3	5	3	5	5	28
1265	Facebook	Female	40's	Almost everyday	6	2	3	3	4	5	2	25
1266	Facebook	Male	40's	Once every few days	3	3	3	3	3	5	3	23
1267	Facebook	Male	50's	Less than once a month	3	4	3	3	4	4	5	26
1268	Facebook	Male	40's	Once every few days	3	5	3	4	6	2	4	27
1269	Facebook	Female	30's	Once a month	5	3	5	3	5	3	3	27
1270	Facebook	Female	40's	Once every few days	3	3	4	3	3	4	3	23
1271	Facebook	Female	40's	Rarely	4	5	4	3	4	5	5	30
1272	Facebook	Male	40's	Rarely	7	4	4	4	4	4	4	31
1273	Facebook	Male	50's	Almost everyday	3	5	3	3	3	2	2	21
1274	Facebook	Male	40's	Almost everyday	5	5	3	4	5	3	5	30
1275	Facebook	Female	30's	Less than once a month	5	5	3	3	5	4	5	30
1276	Facebook	Male	40's	Once every few days	5	5	4	4	4	4	4	30
1277	Facebook	Male	50's	Once every few days	3	4	3	3	3	4	4	24
1278	Facebook	Male	40's	Just created an account	4	5	5	4	5	4	4	31
1279	Facebook	Female	30's	Once every few days	6	3	2	5	3	6	7	32
1280	Facebook	Female	20's	Rarely	4	6	3	1	5	4	5	28
1281	Facebook	Male	50's	Almost everyday	4	4	4	4	4	4	4	28
1282	Facebook	Female	40's	Once every few days	3	6	2	3	5	3	5	27
1283	Facebook	Female	40's	Once every few days	1	7	1	1	7	1	7	25
1284	Facebook	Male	40's	Rarely	3	5	3	3	4	4	5	27
1285	Facebook	Female	40's	Rarely	3	4	3	3	5	5	5	28
1286	Facebook	Male	50's	Once every few days	7	2	6	2	6	2	2	27
1287	Facebook	Male	50's	Less than once a month	5	5	3	5	5	5	5	33
1288	Facebook	Male	30's	Once a month	3	5	3	4	5	5	5	30
1289	Facebook	Male	40's	Rarely	2	3	3	1	2	2	3	16
1290	Facebook	Male	50's	Once every few days	5	4	4	5	4	4	4	30
1291	Facebook	Female	40's	Almost everyday	5	6	3	4	5	4	5	32
1292	Facebook	Female	50's	Rarely	3	5	3	3	5	3	5	27
1293	Facebook	Male	40's	Rarely	3	1	2	1	2	4	1	14
1294	Facebook	Male	50's	Less than once a month	6	4	5	2	5	3	2	27
1295	Facebook	Male	40's	Once every few days	3	5	3	5	5	4	4	29
1296	Facebook	Female	40's	Rarely	4	3	4	3	4	2	3	23
1297	Facebook	Male	40's	Rarely	4	4	4	4	4	4	4	28
1298	Facebook	Female	50's	Less than once a month	3	3	2	7	2	2	2	21
1299	Facebook	Male	30's	Almost everyday	4	4	4	4	4	4	4	28
1300	Facebook	Female	30's	Almost everyday	5	2	4	4	3	4	4	26
1301	Facebook	Male	50's	Once every few days	5	3	5	3	4	4	4	28
1302	Facebook	Female	30's	Less than once a month	5	3	4	2	1	4	2	21
1303	Facebook	Male	50's	Once every few days	5	4	4	3	4	4	4	28
1304	Facebook	Female	20's	Rarely	3	3	3	3	4	4	4	24
1305	Facebook	Male	60's	Once every few days	5	4	3	4	4	5	4	29
1306	Facebook	Female	40's	Once a month	5	3	4	3	4	4	3	26
1307	Facebook	Female	50's	Once every few days	2	5	3	3	4	3	3	23
1308	Facebook	Male	40's	Rarely	4	4	4	4	4	4	4	28
1309	Facebook	Female	40's	Rarely	3	3	3	2	4	4	4	23
1310	Facebook	Male	50's	Once every few days	4	4	5	4	4	4	4	29
1311	Facebook	Male	60's	Almost everyday	4	5	2	3	4	4	5	27
1312	Facebook	Female	50's	Once every few days	3	4	4	4	4	4	5	28
1313	Facebook	Female	30's	Less than once a month	4	3	5	4	4	3	4	27
1314	Facebook	Male	50's	Less than once a month	6	2	7	2	5	2	1	25
1315	Facebook	Male	50's	Almost everyday	3	5	2	4	4	3	3	24
1316	Facebook	Male	30's	Rarely	3	3	3	3	5	5	3	25
1317	Facebook	Female	50's	Once a month	5	5	3	3	4	4	3	27
1318	Facebook	Male	50's	Rarely	2	4	1	3	4	4	4	22
1319	Facebook	Male	30's	Once every few days	1	7	1	4	6	3	4	26
1320	Facebook	Female	40's	Rarely	6	5	4	4	5	4	4	32
1321	Facebook	Female	50's	Just created an account	4	4	4	1	4	4	4	25
1322	Facebook	Male	50's	Rarely	5	4	5	3	4	4	4	29
1323	Facebook	Male	40's	Once every few days	2	5	2	4	5	4	5	27
1324	Facebook	Male	40's	Less than once a month	1	4	5	3	5	3	4	25
1325	Facebook	Male	40's	Rarely	6	3	3	5	3	5	3	28
1326	Facebook	Male	30's	Once every few days	4	5	5	5	5	5	3	32
1327	Facebook	Female	40's	Rarely	4	4	3	4	4	4	4	27
1328	Facebook	Female	30's	Once every few days	3	5	3	4	5	4	4	28
1329	Facebook	Female	40's	Once every few days	4	4	3	4	3	4	5	27
1330	Facebook	Male	40's	Once a month	6	6	5	6	6	5	5	39
1331	Facebook	Male	40's	Almost everyday	6	2	6	1	5	5	5	30
1332	Facebook	Male	40's	Almost everyday	7	5	1	3	5	4	4	29
1333	Facebook	Male	30's	Once a month	3	3	3	2	3	2	3	19
1334	Facebook	Female	40's	Once a month	2	5	3	2	5	4	5	26
1335	Facebook	Male	50's	Almost everyday	7	1	4	4	4	4	4	28
1336	Facebook	Male	30's	Less than once a month	4	3	4	4	4	4	5	28
1337	Facebook	Male	50's	Once every few days	5	7	4	4	7	4	5	36
1338	Facebook	Male	40's	Once every few days	3	5	4	4	6	3	6	31
1339	Facebook	Male	60's	Less than once a month	6	6	6	5	6	6	5	40
1340	Facebook	Female	50's	Rarely	2	2	5	2	2	2	2	17
1341	Facebook	Female	20's	Almost everyday	1	7	1	7	1	7	7	31
1342	Facebook	Male	30's	Once every few days	2	5	3	3	5	3	4	25
1343	Facebook	Female	30's	Once every few days	5	3	5	2	5	4	4	28
1344	Facebook	Male	50's	Almost everyday	6	7	2	7	7	1	4	34
1345	Facebook	Male	40's	Once every few days	3	3	5	3	5	3	3	25
1346	Facebook	Male	30's	Almost everyday	7	6	1	6	3	7	7	37
1347	Facebook	Male	40's	Once every few days	5	4	5	5	5	4	4	32
1348	Facebook	Male	40's	Less than once a month	5	3	3	3	5	3	5	27
1349	Facebook	Male	40's	Rarely	4	4	4	4	4	4	4	28
1350	Facebook	Male	60's	Once every few days	4	4	4	4	4	4	4	28
1351	Facebook	Female	20's	Once a month	5	3	3	5	5	5	3	29
1352	Facebook	Male	50's	Once every few days	4	3	6	5	5	3	4	30
1353	Facebook	Male	30's	Rarely	3	4	4	3	4	5	3	26
1354	Facebook	Male	50's	Once every few days	2	3	3	4	4	5	5	26
1355	Facebook	Female	30's	Rarely	4	5	3	3	4	2	2	23
1356	Facebook	Male	40's	Less than once a month	5	5	3	5	5	5	6	34
1357	Facebook	Female	30's	Rarely	3	3	4	2	3	4	4	23
1358	Facebook	Male	50's	Once every few days	5	3	5	3	4	4	4	28
1359	Facebook	Male	30's	Almost everyday	5	5	4	3	6	5	5	33
1360	Facebook	Female	40's	Once every few days	6	2	6	3	5	5	6	33
1361	Facebook	No answer	50's	Rarely	5	3	4	3	4	4	4	27
1362	Facebook	Female	30's	Rarely	4	4	3	4	4	4	4	27
1363	Facebook	Male	40's	Almost everyday	4	5	4	4	5	5	3	30
1364	Facebook	Male	40's	Once every few days	3	5	2	3	5	3	5	26
1365	Facebook	Male	40's	Once every few days	4	5	3	4	4	4	3	27
1366	Facebook	Female	50's	Rarely	4	4	4	4	4	4	4	28
1367	Facebook	Male	20's	Once every few days	6	4	4	3	4	6	3	30
1368	Facebook	Male	50's	Rarely	4	6	3	2	4	3	4	26
1369	Facebook	Male	40's	Once every few days	3	4	3	3	4	4	4	25
1370	Facebook	Male	30's	Almost everyday	4	5	3	5	3	5	5	30
1371	Facebook	Male	50's	Once every few days	4	4	3	3	4	4	4	26
1372	Facebook	Male	40's	Almost everyday	4	5	5	5	4	5	6	34
1373	Facebook	Male	40's	Rarely	4	4	3	4	4	3	4	26
1374	Facebook	Male	60's	Once a month	4	4	4	4	4	4	4	28
1375	Facebook	Male	40's	Once a month	3	2	3	3	5	3	5	24
1376	Facebook	Female	30's	Once a month	6	4	4	3	5	4	3	29
1377	Facebook	Female	30's	Rarely	3	5	3	4	5	4	3	27
1378	Facebook	Male	30's	Less than once a month	4	4	4	4	4	4	4	28
1379	Facebook	Male	40's	Once a month	5	3	5	2	5	5	2	27
1380	Facebook	Female	30's	Once a month	1	3	1	1	5	1	4	16
1381	Facebook	Female	30's	Once every few days	5	5	3	5	5	5	5	33
1382	Facebook	Male	20's	Once every few days	5	4	3	2	3	2	4	23
1383	Facebook	Male	50's	Almost everyday	3	5	2	4	4	3	4	25
1384	Facebook	Male	30's	Once every few days	5	5	4	4	5	4	4	31
1385	Facebook	Male	40's	Rarely	3	6	3	3	5	5	7	32
1386	Facebook	Male	50's	Almost everyday	3	5	2	4	4	4	4	26
1387	Facebook	Male	50's	Once every few days	3	5	5	3	5	5	5	31
1388	Facebook	Female	30's	Rarely	3	6	3	3	5	4	6	30
1389	Facebook	Male	50's	Once a month	6	5	3	2	2	4	4	26
1390	Facebook	Female	30's	Rarely	3	5	3	3	5	4	4	27
1391	Facebook	Male	40's	Once a month	4	5	4	4	4	4	5	30
1392	Facebook	Female	30's	Once every few days	5	5	2	1	6	4	5	28
1393	Facebook	Male	40's	Just created an account	3	5	3	3	3	4	3	24
1394	Facebook	Female	40's	Almost everyday	6	6	1	2	1	3	2	21
1395	Facebook	Male	40's	Less than once a month	4	3	3	2	3	4	3	22
1396	Facebook	Female	40's	Almost everyday	2	7	1	2	5	5	4	26
1397	Facebook	Male	20's	Rarely	3	6	3	3	6	3	6	30
1398	Facebook	Female	40's	Rarely	3	5	5	5	3	5	5	31
1399	Facebook	Male	60's	Once a month	5	5	4	4	4	4	4	30
1400	Facebook	Male	30's	Once every few days	5	5	3	3	3	4	5	28
1401	Facebook	Male	40's	Once every few days	4	4	4	4	4	4	4	28
1402	Facebook	Male	40's	Almost everyday	3	5	3	3	4	4	5	27
1403	Facebook	Male	40's	Rarely	3	3	3	4	5	4	3	25
1404	Facebook	Male	50's	Once every few days	5	5	4	5	4	5	5	33
1405	Facebook	Male	30's	Rarely	3	4	4	4	4	4	4	27
1406	Facebook	Male	30's	Once a month	3	5	3	4	4	4	5	28
1407	Facebook	Male	50's	Almost everyday	4	5	3	5	2	2	2	23
1408	Facebook	Female	50's	Once a month	4	5	3	5	4	5	5	31
1409	Facebook	Male	40's	Once every few days	4	4	4	4	3	4	4	27
1410	Facebook	Male	40's	Once every few days	4	4	5	5	6	5	4	33
1411	Facebook	Male	40's	Once every few days	3	5	3	3	4	4	5	27
1412	Facebook	Male	30's	Almost everyday	5	5	1	1	7	1	7	27
1413	Facebook	Female	40's	Once a month	4	4	4	3	4	4	4	27
1414	Facebook	Male	50's	Rarely	3	5	3	3	3	4	5	26
1415	Facebook	Female	50's	Almost everyday	3	4	3	4	3	4	5	26
1416	Facebook	Male	50's	Just created an account	5	5	4	4	5	5	5	33
1417	Facebook	Male	50's	Rarely	3	6	1	2	4	1	5	22
1418	Facebook	Male	50's	Almost everyday	2	5	3	3	3	3	5	24
1419	Facebook	Female	40's	Almost everyday	2	2	3	4	6	4	4	25
1420	Facebook	Male	40's	Once a month	4	4	4	4	4	4	4	28
1421	Facebook	Male	40's	Just created an account	4	4	4	4	4	4	4	28
1422	Facebook	Female	50's	Rarely	4	4	3	3	4	4	2	24
1423	Facebook	Male	40's	Almost everyday	4	3	2	6	3	6	3	27
1424	Facebook	Male	40's	Rarely	2	4	2	4	3	3	4	22
1425	Facebook	Male	40's	Once a month	3	5	3	3	5	5	5	29
1426	Facebook	Male	40's	Once every few days	4	6	4	5	5	4	4	32
1427	Facebook	Male	30's	Once every few days	6	3	2	1	4	3	5	24
1428	Facebook	Male	40's	Almost everyday	4	2	4	4	4	4	3	25
1429	Facebook	Male	40's	Just created an account	3	5	3	3	5	4	4	27
1430	Facebook	Female	30's	Once every few days	5	4	5	3	4	3	2	26
1431	Facebook	Male	40's	Just created an account	4	4	4	4	4	4	4	28
1432	Facebook	Male	50's	Less than once a month	4	5	5	4	3	3	5	29
1433	Facebook	Male	40's	Rarely	3	4	4	3	4	3	3	24
1434	Facebook	Male	40's	Less than once a month	5	4	4	4	3	3	6	29
1435	Facebook	Female	50's	Once a month	4	5	2	4	5	4	5	29
1436	Facebook	Female	50's	Rarely	3	5	3	2	5	3	5	26
1437	Facebook	Female	30's	Just created an account	1	1	1	1	1	1	7	13
1438	Facebook	Male	50's	Almost everyday	5	5	3	4	4	4	4	29
1439	Facebook	Male	60's	Once every few days	5	4	4	5	4	4	5	31
1440	Facebook	Male	60's	Almost everyday	5	6	6	5	6	5	6	39
1441	Facebook	Female	40's	Rarely	1	6	2	1	6	3	4	23
1442	Facebook	Female	50's	Rarely	3	5	3	3	4	3	4	25
1443	Facebook	Male	40's	Once a month	2	6	3	1	7	1	1	21
1444	Facebook	Female	50's	Once a month	5	5	5	4	5	5	5	34
1445	Facebook	Male	30's	Once a month	1	5	2	1	2	4	6	21
1446	Facebook	Female	70's~	Rarely	5	5	3	2	3	2	4	24
1447	Facebook	Male	60's	Once every few days	7	1	7	1	4	1	4	25
1448	Facebook	Male	40's	Once a month	5	3	5	2	5	3	2	25
1449	Facebook	Male	40's	Almost everyday	5	4	5	5	5	4	5	33
1450	Facebook	Female	50's	Once every few days	5	5	4	4	3	3	5	29
1451	Facebook	Female	50's	Rarely	3	5	4	4	5	4	5	30
1452	Facebook	Male	60's	Once every few days	5	5	5	5	5	5	5	35
1453	Facebook	Female	40's	Once every few days	3	5	3	3	4	4	5	27
1454	Facebook	Male	30's	Almost everyday	2	4	4	4	4	4	4	26
1455	Facebook	Male	50's	Once every few days	5	5	3	3	4	3	5	28
1456	Facebook	Male	60's	Almost everyday	7	6	4	5	5	5	6	38
1457	Facebook	Female	30's	Once a month	6	1	6	2	5	2	2	24
1458	Facebook	Male	50's	Once a month	3	5	3	6	5	5	3	30
1459	Facebook	Female	40's	Rarely	4	5	1	3	5	4	4	26
1460	Facebook	Male	40's	Once a month	3	5	3	2	5	3	5	26
1461	Facebook	Female	60's	Once every few days	4	4	4	4	4	4	4	28
1462	Facebook	Male	30's	Once every few days	2	3	5	3	6	5	5	29
1463	Facebook	Female	40's	Rarely	4	5	5	3	3	4	3	27
1464	Facebook	Male	40's	Almost everyday	4	5	4	3	4	4	4	28
1465	Facebook	Male	30's	Once every few days	5	5	3	6	3	5	4	31
1466	Facebook	Female	20's	Once every few days	4	4	4	4	4	4	4	28
1467	Facebook	Female	40's	Rarely	3	5	4	4	5	3	4	28
1468	Facebook	Male	40's	Rarely	5	3	4	4	4	4	4	28
1469	Facebook	Male	40's	Once a month	5	4	5	5	4	3	4	30
1470	Facebook	Male	40's	Rarely	5	3	6	4	3	3	2	26
1471	Facebook	Male	50's	Rarely	5	2	2	2	4	4	3	22
1472	Facebook	Female	20's	Once every few days	3	4	4	3	4	4	4	26
1473	Facebook	Male	40's	Just created an account	4	4	4	4	4	4	4	28
1474	Facebook	Female	50's	Rarely	3	3	5	2	5	3	3	24
1475	Facebook	Male	30's	Once a month	3	5	3	4	5	3	4	27
1476	Facebook	Male	40's	Rarely	4	4	4	4	4	4	4	28
1477	Facebook	Male	40's	Almost everyday	5	3	4	4	5	3	3	27
1478	Facebook	Male	30's	Rarely	4	5	4	5	5	4	4	31
1479	Facebook	Female	30's	Once a month	3	5	6	1	5	4	3	27
1480	Facebook	Male	40's	Once every few days	6	3	4	3	5	2	2	25
1481	Facebook	Male	30's	Once every few days	3	5	2	4	5	3	4	26
1482	Facebook	Male	60's	Almost everyday	7	7	3	5	6	6	6	40
1483	Facebook	Male	40's	Once every few days	4	2	5	3	5	5	5	29
1484	Facebook	Female	50's	Almost everyday	3	3	3	3	3	3	3	21
1485	Facebook	Male	50's	Less than once a month	3	4	4	2	4	3	4	24
1486	Facebook	Male	40's	Once every few days	6	6	4	6	6	6	6	40
1487	Facebook	Male	40's	Rarely	3	5	4	3	5	5	5	30
1488	Facebook	Male	50's	Once every few days	4	6	2	2	4	3	5	26
1489	Facebook	Male	40's	Almost everyday	2	6	2	5	1	5	3	24
1490	Facebook	Male	20's	Once every few days	3	5	4	6	5	5	5	33
1491	Facebook	Male	50's	Rarely	4	5	5	4	4	4	4	30
1492	Facebook	Male	40's	Once every few days	3	5	4	2	5	5	5	29
1493	Facebook	Female	40's	Once every few days	2	5	4	3	3	3	2	22
1494	Facebook	Male	50's	Once a month	5	4	3	3	3	4	5	27
1495	Facebook	Male	50's	Almost everyday	5	3	5	2	6	2	3	26
1496	Facebook	Male	20's	Once every few days	2	4	6	2	3	3	3	23
1497	Facebook	Male	50's	Once a month	3	3	2	3	5	3	2	21
1498	Facebook	Male	40's	Almost everyday	3	5	3	3	4	3	3	24
1499	Facebook	Male	30's	Once every few days	4	4	4	4	4	4	4	28
1500	Facebook	Male	30's	Once a month	3	3	6	2	4	5	3	26
1501	Facebook	Male	30's	Almost everyday	2	5	3	5	6	4	5	30
1502	Facebook	Male	30's	Once every few days	3	5	3	2	5	3	4	25
1503	Facebook	Female	20's	Once every few days	3	4	4	4	4	3	5	27
1504	Facebook	Male	30's	Less than once a month	5	4	5	4	3	4	5	30
1505	Facebook	Male	50's	Once a month	3	3	3	3	3	5	2	22
1506	Facebook	Female	60's	Rarely	5	3	5	4	5	5	2	29
1507	Facebook	Male	40's	Rarely	2	5	2	2	4	2	5	22
1508	Facebook	Male	40's	Rarely	6	5	6	3	5	6	4	35
1509	Facebook	Female	30's	Almost everyday	4	4	4	3	4	4	4	27
1510	Facebook	Male	50's	Once every few days	5	3	3	4	5	3	4	27
1511	Facebook	Male	50's	Less than once a month	4	5	3	5	3	5	5	30
1512	Facebook	Male	40's	Once every few days	4	5	4	5	5	4	3	30
1513	Facebook	Female	60's	Rarely	5	2	4	3	5	3	7	29
1514	Facebook	Male	30's	Once every few days	4	4	4	3	4	4	4	27
1515	Facebook	Female	40's	Once every few days	4	1	4	1	1	1	1	13
1516	Facebook	Female	20's	Rarely	5	3	5	4	4	4	4	29
1517	Facebook	Female	50's	Almost everyday	3	5	5	3	5	5	5	31
1518	Facebook	Male	60's	Rarely	5	4	3	3	4	3	4	26
1519	Facebook	Male	50's	Less than once a month	4	3	5	4	5	4	3	28
1520	Facebook	Male	50's	Once a month	7	3	6	2	6	2	2	28
1521	Facebook	Male	40's	Once every few days	6	3	5	5	2	4	3	28
1522	Facebook	Male	50's	Once a month	5	4	4	3	4	3	3	26
1523	Facebook	Male	40's	Once a month	5	3	5	4	5	4	4	30
1524	Facebook	Male	30's	Less than once a month	4	4	4	4	4	4	3	27
1525	Facebook	Female	30's	Once a month	5	3	4	2	4	3	4	25
1526	Facebook	Male	40's	Once a month	7	4	3	3	4	3	1	25
1527	Facebook	Male	40's	Almost everyday	5	6	3	3	6	4	4	31
1528	Facebook	Female	50's	Rarely	4	6	3	3	5	3	5	29
1529	Facebook	Male	40's	Rarely	7	5	6	3	3	5	4	33
1530	Facebook	Male	50's	Almost everyday	2	4	2	4	5	4	4	25
1531	Facebook	Male	40's	Once every few days	3	4	3	5	3	5	3	26
1532	Facebook	Male	30's	Once every few days	5	5	3	1	6	4	5	29
1533	Facebook	Male	40's	Almost everyday	5	5	5	5	3	3	3	29
1534	Facebook	Male	30's	Once a month	6	2	5	3	5	3	2	26
1535	Facebook	Female	50's	Once every few days	4	4	3	3	4	4	5	27
1536	Facebook	Male	40's	Rarely	1	7	1	3	3	4	4	23
1537	Facebook	Female	20's	Just created an account	2	3	6	1	2	3	3	20
1538	Facebook	Male	30's	Once every few days	7	1	5	6	6	1	1	27
1539	Facebook	Male	50's	Almost everyday	6	2	6	4	4	4	6	32
1540	Facebook	Female	50's	Less than once a month	5	3	4	3	5	3	3	26
1541	Facebook	Male	60's	Rarely	3	4	3	3	4	4	4	25
1542	Facebook	Female	50's	Less than once a month	4	4	5	3	4	4	3	27
1543	Facebook	Male	30's	Rarely	3	5	3	2	3	3	3	22
1544	Facebook	Male	60's	Rarely	2	5	2	1	2	2	2	16
1545	Facebook	Male	50's	Less than once a month	7	1	5	4	2	5	6	30
1546	Facebook	Male	40's	Once a month	4	5	5	4	4	4	5	31
1547	Facebook	Female	50's	Once a month	4	5	5	4	5	5	5	33
1548	Facebook	Male	40's	Almost everyday	7	6	7	4	7	5	5	41
1549	Facebook	Male	50's	Once every few days	5	5	4	5	3	3	4	29
1550	Facebook	Male	40's	Once a month	4	4	4	4	5	4	3	28
1551	Facebook	Male	50's	Almost everyday	4	4	4	4	4	3	4	27
1552	Facebook	Male	30's	Almost everyday	4	4	4	4	4	4	4	28
1553	Facebook	Male	50's	Once a month	4	5	3	3	3	5	4	27
1554	Facebook	Male	20's	Once a month	5	3	4	5	5	4	3	29
1555	Facebook	Male	50's	Almost everyday	3	4	3	3	4	4	5	26
1556	Facebook	Male	50's	Rarely	6	5	3	4	5	3	4	30
1557	Facebook	Male	40's	Almost everyday	4	4	4	4	4	4	4	28
1558	Facebook	Male	30's	Once every few days	3	2	3	2	1	3	2	16
1559	Facebook	Male	30's	Rarely	2	5	3	1	4	3	4	22
1560	Facebook	Male	60's	Once a month	6	6	6	5	3	4	5	35
1561	Facebook	Male	40's	Rarely	3	4	3	2	4	3	6	25
1562	Facebook	Male	40's	Less than once a month	4	5	4	4	5	4	4	30
1563	Facebook	Male	50's	Less than once a month	4	4	3	3	3	3	3	23
1564	Facebook	Female	30's	Just created an account	3	4	5	1	4	4	4	25
1565	Facebook	Male	60's	Once a month	3	5	3	5	3	5	5	29
1566	Facebook	Male	50's	Almost everyday	3	5	3	4	3	4	5	27
1567	Facebook	Female	40's	Rarely	3	4	3	3	4	4	4	25
1568	Facebook	Male	40's	Just created an account	4	4	4	4	4	4	4	28
1569	Facebook	Female	30's	Almost everyday	5	5	3	4	5	5	3	30
1570	Facebook	Female	40's	Rarely	4	4	3	3	3	4	4	25
1571	Facebook	Male	40's	Rarely	4	5	3	3	4	4	5	28
1572	Facebook	Female	20's	Rarely	4	5	2	3	5	4	3	26
1573	Facebook	Male	30's	Just created an account	6	5	4	4	4	4	5	32
1574	Facebook	Male	10's	Almost everyday	7	1	7	1	7	1	1	25
1575	Facebook	Male	30's	Once every few days	5	5	2	4	4	2	6	28
1576	Facebook	Female	30's	Just created an account	4	5	4	4	5	3	5	30
1577	Facebook	Female	40's	Almost everyday	6	4	4	4	5	2	2	27
1578	Facebook	Female	50's	Once a month	4	4	4	4	4	4	4	28
1579	Facebook	Male	40's	Less than once a month	4	3	3	2	5	4	5	26
1580	Facebook	Male	40's	Once a month	3	4	3	3	3	4	5	25
1581	Facebook	Male	40's	Rarely	4	6	2	1	6	4	5	28
1582	Facebook	Male	40's	Once a month	5	3	6	5	2	1	3	25
1583	Facebook	Male	30's	Less than once a month	6	1	6	1	7	3	2	26
1584	Facebook	Female	20's	Once a month	4	4	4	3	3	4	4	26
1585	Facebook	No answer	40's	Almost everyday	4	5	3	3	4	3	5	27
1586	Facebook	Female	30's	Rarely	5	5	3	2	5	3	5	28
1587	Facebook	Male	30's	Almost everyday	5	5	3	5	5	5	5	33
1588	Facebook	Female	40's	Once every few days	4	4	5	3	4	4	3	27
1589	Facebook	Male	40's	Once a month	2	5	3	3	3	5	6	27
1590	Facebook	Female	30's	Almost everyday	6	6	6	2	6	7	7	40
1591	Facebook	Male	40's	Almost everyday	3	6	3	2	5	5	7	31
1592	Facebook	Female	30's	Rarely	6	5	4	6	3	4	3	31
1593	Facebook	Male	20's	Once a month	6	2	2	5	6	4	4	29
1594	Facebook	Male	40's	Almost everyday	5	3	5	3	4	5	4	29
1595	Facebook	Male	50's	Rarely	1	3	1	3	4	4	5	21
1596	Facebook	Male	50's	Just created an account	2	5	4	2	5	3	5	26
1597	Facebook	Female	20's	Just created an account	4	4	3	1	4	3	3	22
1598	Facebook	Female	20's	Just created an account	4	4	4	4	4	4	4	28
1599	Facebook	Female	20's	Rarely	3	5	3	4	5	3	4	27
1600	Facebook	Female	30's	Once a month	6	4	4	5	4	3	3	29
1601	Facebook	Male	20's	Almost everyday	6	3	5	3	6	4	4	31
1602	Facebook	Male	30's	Just created an account	4	4	4	4	4	4	4	28
1603	Facebook	Male	60's	Almost everyday	3	5	3	3	5	3	5	27
1604	Facebook	Male	40's	Almost everyday	4	3	3	3	4	3	4	24
1605	Facebook	Female	30's	Once every few days	3	3	3	4	5	5	5	28
1606	Facebook	Female	30's	Once every few days	5	3	3	2	2	4	5	24
1607	Facebook	Female	30's	Almost everyday	5	5	3	4	6	5	4	32
1608	Facebook	Female	30's	Once every few days	5	5	5	5	5	5	5	35
1609	Facebook	Female	40's	Rarely	3	2	2	1	6	2	2	18
1610	Facebook	Male	40's	Rarely	6	5	5	2	6	3	5	32
1611	Facebook	Male	40's	Once every few days	3	5	4	4	3	3	5	27
1612	Facebook	Female	30's	Once every few days	2	6	2	3	5	3	5	26
1613	Facebook	Male	70's~	Rarely	5	5	5	4	4	4	5	32
1614	Facebook	Male	50's	Just created an account	2	6	2	2	6	2	6	26
1615	Facebook	Male	30's	Once every few days	2	4	1	2	2	1	4	16
1616	Facebook	Female	30's	Rarely	3	5	4	3	5	6	4	30
1617	Facebook	Female	60's	Once every few days	6	4	5	4	4	4	4	31
1618	Facebook	Male	50's	Rarely	4	5	5	3	4	3	5	29
1619	Facebook	Male	60's	Rarely	4	4	4	2	4	4	3	25
1620	Facebook	Female	40's	Once every few days	3	5	3	3	5	3	5	27
1621	Facebook	Female	50's	Once every few days	5	4	5	5	4	5	5	33
1622	Facebook	Male	40's	Just created an account	4	3	3	2	2	2	2	18
1623	Facebook	Male	40's	Just created an account	2	1	2	1	2	2	1	11
1624	Facebook	Male	30's	Once every few days	1	5	2	7	1	7	6	29
1625	Facebook	Male	50's	Almost everyday	6	5	4	5	6	4	3	33
1626	Facebook	Female	60's	Almost everyday	7	3	5	4	3	5	5	32
1627	Facebook	Female	40's	Once every few days	2	6	3	5	3	5	5	29
1628	Facebook	Female	30's	Almost everyday	3	5	3	3	5	3	4	26
1629	Facebook	Male	30's	Less than once a month	6	5	6	3	3	3	4	30
1630	Facebook	Male	50's	Rarely	7	2	5	7	4	5	6	36
1631	Facebook	Male	50's	Almost everyday	5	4	4	4	4	4	4	29
1632	Facebook	Male	30's	Rarely	4	4	4	5	4	5	4	30
1633	Facebook	Male	20's	Once every few days	5	3	5	3	4	3	2	25
1634	Facebook	No answer	20's	Once every few days	5	3	5	4	3	4	4	28
1635	Facebook	Male	40's	Once every few days	3	4	3	3	4	4	4	25
1636	Facebook	Male	50's	Once every few days	7	1	1	1	1	1	1	13
1637	Facebook	Female	40's	Less than once a month	6	2	3	2	5	5	2	25
1638	Facebook	Male	50's	Once every few days	6	4	4	4	4	5	5	32
1639	Facebook	Female	30's	Once every few days	3	5	5	1	5	4	4	27
1640	Facebook	Male	40's	Rarely	3	3	3	3	3	3	5	23
1641	Facebook	Male	30's	Less than once a month	3	5	3	2	5	4	5	27
1642	Facebook	Female	30's	Once every few days	5	3	5	4	5	4	5	31
1643	Facebook	Male	40's	Almost everyday	4	5	3	4	4	4	3	27
1644	Facebook	Male	40's	Less than once a month	5	5	4	4	3	3	4	28
1645	Facebook	Female	50's	Rarely	7	5	4	5	5	4	4	34
1646	Facebook	Male	50's	Just created an account	3	4	2	2	4	3	4	22
1647	Facebook	Male	40's	Once every few days	4	4	4	4	4	4	4	28
1648	Facebook	Male	50's	Less than once a month	4	5	5	5	3	5	5	32
1649	Facebook	Male	40's	Just created an account	4	4	4	4	4	4	4	28
1650	Facebook	Male	40's	Once a month	3	5	3	5	5	4	4	29
1651	Facebook	Male	30's	Less than once a month	1	7	7	4	7	5	5	36
1652	Facebook	Male	40's	Almost everyday	5	5	4	5	5	3	4	31
1653	Facebook	Male	50's	Rarely	5	4	3	4	4	4	4	28
1654	Facebook	Male	40's	Rarely	4	4	6	4	4	3	5	30
1655	Facebook	Male	60's	Rarely	5	3	5	3	5	3	4	28
1656	Facebook	Male	20's	Once every few days	2	6	3	3	6	3	2	25
1657	Facebook	Male	30's	Once every few days	7	6	5	6	6	5	3	38
1658	Facebook	Female	40's	Less than once a month	3	5	3	4	4	4	3	26
1659	Facebook	Male	40's	Once a month	6	5	3	4	5	5	5	33
1660	Facebook	Female	40's	Rarely	3	4	3	3	3	4	5	25
1661	Facebook	Male	40's	Rarely	1	3	3	4	3	4	5	23
1662	Facebook	Male	40's	Rarely	4	4	4	4	4	4	4	28
1663	Facebook	Male	30's	Rarely	1	5	4	2	6	5	6	29
1664	Facebook	Male	40's	Rarely	3	3	3	2	3	3	3	20
1665	Facebook	Male	40's	Once every few days	5	4	5	3	5	4	4	30
1666	Facebook	Male	50's	Once every few days	5	5	5	4	5	4	4	32
1667	Facebook	Male	40's	Rarely	4	4	4	4	4	4	4	28
1668	Facebook	Male	40's	Just created an account	4	4	5	4	4	4	4	29
1669	Facebook	Male	50's	Rarely	4	3	4	4	4	4	4	27
1670	Facebook	Male	40's	Once every few days	4	3	4	5	5	4	5	30
1671	Facebook	Male	40's	Once every few days	4	4	4	4	4	4	4	28
1672	Facebook	Female	30's	Once every few days	5	3	4	4	4	5	5	30
1673	Facebook	Male	30's	Almost everyday	4	5	5	4	6	4	4	32
1674	Facebook	Male	30's	Rarely	3	3	3	3	5	3	5	25
1675	Facebook	Male	50's	Rarely	4	4	4	3	4	4	4	27
1676	Facebook	Male	70's~	Rarely	3	4	3	4	5	5	5	29
1677	Facebook	Male	40's	Rarely	4	5	3	1	3	3	5	24
1678	Facebook	Female	60's	Almost everyday	3	5	3	5	5	4	6	31
1679	Facebook	Female	30's	Rarely	3	5	3	2	6	4	5	28
1680	Facebook	Male	40's	Once a month	3	6	3	4	6	3	5	30
1681	Facebook	Female	20's	Rarely	4	7	4	1	4	4	5	29
1682	Facebook	Male	30's	Almost everyday	3	3	4	4	5	3	4	26
1683	Facebook	Female	30's	Almost everyday	7	4	2	3	4	4	1	25
1684	Facebook	Male	40's	Rarely	7	5	3	3	5	3	3	29
1685	Facebook	Male	50's	Rarely	6	4	6	4	4	3	3	30
1686	Facebook	Male	40's	Rarely	2	5	2	2	4	4	5	24
1687	Facebook	Male	30's	Almost everyday	3	4	4	4	5	3	4	27
1688	Facebook	Male	50's	Less than once a month	7	5	4	4	6	5	6	37
1689	Facebook	Male	60's	Rarely	4	5	4	3	6	2	4	28
1690	Facebook	Female	30's	Rarely	5	3	2	2	2	3	3	20
1691	Facebook	Male	50's	Almost everyday	5	6	2	5	6	2	5	31
1692	Facebook	Female	50's	Once every few days	3	5	2	3	5	3	5	26
1693	Facebook	Female	40's	Rarely	3	6	1	4	4	3	5	26
1694	Facebook	Female	50's	Once every few days	3	6	4	2	4	5	5	29
1695	Facebook	Female	30's	Almost everyday	3	4	3	3	4	4	5	26
1696	Facebook	Male	40's	Once every few days	6	2	6	2	6	2	2	26
1697	Facebook	Female	20's	Once a month	4	5	3	1	5	4	4	26
1698	Facebook	Male	20's	Rarely	3	3	6	2	7	2	4	27
1699	Facebook	Female	30's	Once every few days	3	5	4	3	4	4	4	27
1700	Facebook	Female	30's	Once a month	3	5	4	3	5	4	5	29
1701	Facebook	Female	60's	Rarely	3	4	3	4	4	4	4	26
1702	Facebook	Male	40's	Less than once a month	4	5	5	4	5	5	5	33
1703	Facebook	Male	40's	Just created an account	1	1	1	1	1	1	1	7
1704	Facebook	Female	30's	Rarely	3	5	3	3	4	4	5	27
1705	Facebook	Female	30's	Almost everyday	3	3	3	4	5	4	5	27
1706	Facebook	Female	30's	Less than once a month	3	5	2	3	4	3	3	23
1707	Facebook	Male	20's	Once every few days	6	2	7	2	6	3	2	28
1708	Facebook	Male	40's	Once every few days	6	2	6	2	6	1	2	25
1709	Facebook	Male	20's	Rarely	3	4	4	4	4	4	4	27
1710	Facebook	Female	70's~	Rarely	4	5	5	6	5	4	4	33
1711	Facebook	Male	40's	Rarely	3	5	5	6	5	4	4	32
1712	Facebook	Female	30's	Less than once a month	3	4	3	4	4	5	4	27
1713	Facebook	Female	40's	Once every few days	4	5	5	3	5	5	5	32
1714	Facebook	Male	30's	Once every few days	2	4	3	3	3	5	4	24
1715	Facebook	Male	40's	Once every few days	1	1	1	1	2	1	1	8
1716	Facebook	Female	50's	Rarely	4	3	2	1	4	3	3	20
1717	Facebook	Male	40's	Once a month	3	5	3	5	5	4	4	29
1718	Facebook	Female	30's	Once a month	3	5	3	3	3	4	4	25
1719	Facebook	Male	40's	Once a month	3	5	3	5	5	4	4	29
1720	Facebook	Female	40's	Almost everyday	4	5	2	2	6	3	5	27
1721	Facebook	Female	40's	Once every few days	4	4	4	4	4	4	4	28
1722	Facebook	Male	40's	Once a month	3	5	3	5	5	3	3	27
1723	Facebook	Male	40's	Almost everyday	6	5	3	3	2	2	2	23
1724	Facebook	Male	60's	Less than once a month	1	5	2	3	6	3	6	26
1725	Facebook	Male	40's	Less than once a month	6	5	6	5	5	3	3	33
1726	Facebook	Male	50's	Just created an account	7	1	7	1	7	1	1	25
1727	Facebook	Male	40's	Once every few days	5	4	4	4	4	4	4	29
1728	Facebook	Female	40's	Almost everyday	6	5	3	2	2	2	3	23
1729	Facebook	Female	40's	Just created an account	2	6	3	4	6	3	5	29
1730	Facebook	Female	40's	Just created an account	7	1	1	1	1	1	1	13
1731	Facebook	Female	40's	Once every few days	3	3	2	4	2	3	5	22
1732	Facebook	Female	30's	Almost everyday	5	2	3	3	6	4	3	26
1733	Facebook	Male	30's	Once every few days	7	1	7	4	4	4	5	32
1734	Facebook	Male	30's	Just created an account	3	5	3	4	4	3	5	27
1735	Facebook	Male	30's	Almost everyday	3	5	3	5	3	5	4	28
1736	Facebook	Female	40's	Rarely	4	6	3	4	6	4	4	31
1737	Facebook	Male	40's	Rarely	5	4	4	3	4	4	3	27
1738	Facebook	Male	30's	Almost everyday	3	5	2	4	5	3	5	27
1739	Facebook	Male	50's	Once every few days	5	6	2	3	5	4	3	28
1740	Facebook	Female	40's	Rarely	3	3	4	4	4	4	4	26
1741	Facebook	No answer	40's	Rarely	7	1	7	1	7	1	1	25
1742	Facebook	Female	30's	Rarely	5	4	5	4	1	4	3	26
1743	Facebook	Male	30's	Once a month	3	5	3	3	5	4	5	28
1744	Facebook	Female	40's	Almost everyday	2	7	2	4	5	7	7	34
1745	Facebook	Male	30's	Rarely	4	6	4	3	6	5	1	29
1746	Facebook	Male	30's	Once every few days	1	7	1	4	5	3	4	25
1747	Facebook	Female	40's	Once every few days	2	2	2	2	2	2	5	17
1748	Facebook	Male	30's	Once every few days	2	5	3	2	5	3	5	25
1749	Facebook	Male	30's	Once every few days	3	2	2	2	4	4	6	23
1750	Facebook	Female	50's	Rarely	3	4	3	4	3	4	5	26
1751	Facebook	Male	40's	Almost everyday	6	3	5	4	4	5	3	30
1752	Facebook	Male	30's	Once every few days	6	3	6	3	4	4	4	30
1753	Facebook	Male	40's	Almost everyday	6	2	6	6	6	5	4	35
1754	Facebook	Female	30's	Once every few days	3	5	4	3	5	4	5	29
1755	Facebook	Male	40's	Once every few days	5	4	6	2	5	4	2	28
1756	Facebook	Male	30's	Almost everyday	5	5	6	6	4	5	3	34
1757	Facebook	Female	30's	Almost everyday	2	6	2	2	4	2	4	22
1758	Facebook	Male	40's	Once every few days	3	5	3	3	3	4	4	25
1759	Facebook	Male	40's	Almost everyday	3	7	1	2	6	2	6	27
1760	Facebook	Female	50's	Rarely	2	4	2	3	3	4	4	22
1761	Facebook	Female	20's	Once a month	7	1	1	1	1	1	1	13
1762	Facebook	Male	30's	Almost everyday	5	7	1	1	6	2	6	28
1763	Facebook	Female	50's	Once every few days	6	5	2	4	6	4	4	31
1764	Facebook	Male	40's	Rarely	7	1	7	1	7	1	1	25
1765	Facebook	Female	40's	Once every few days	2	5	4	4	4	5	5	29
1766	Facebook	Female	20's	Once every few days	2	3	3	2	4	5	5	24
1767	Facebook	Male	60's	Once every few days	4	2	6	2	5	2	2	23
1768	Facebook	Male	50's	Once a month	4	4	2	3	2	3	2	20
1769	Facebook	Male	50's	Once every few days	6	4	7	5	5	6	5	38
1770	Facebook	Female	20's	Once every few days	3	6	2	4	6	6	5	32
1771	Facebook	Male	30's	Just created an account	1	2	1	1	4	3	3	15
1772	Facebook	Female	30's	Once every few days	6	7	5	5	6	5	6	40
1773	Facebook	Male	40's	Almost everyday	6	6	2	3	2	5	6	30
1774	Facebook	Male	60's	Once a month	4	3	3	4	4	5	5	28
1775	Facebook	Male	60's	Less than once a month	2	2	3	4	5	3	5	24
1776	Facebook	Male	50's	Almost everyday	2	4	3	4	5	5	5	28
1777	Facebook	Male	40's	Rarely	4	4	4	4	4	4	4	28
1778	Facebook	Male	40's	Once every few days	3	4	4	3	4	4	5	27
1779	Facebook	Male	30's	Rarely	5	3	3	5	5	5	3	29
1780	Facebook	Female	40's	Almost everyday	4	5	4	1	2	4	4	24
1781	Facebook	Female	40's	Rarely	3	7	1	5	5	3	5	29
1782	Facebook	Female	50's	Almost everyday	5	5	4	5	5	5	5	34
1783	Facebook	Male	20's	Just created an account	4	4	4	4	4	5	3	28
1784	Facebook	Male	20's	Almost everyday	3	6	5	2	4	3	3	26
1785	Facebook	Female	40's	Almost everyday	3	3	3	2	5	3	2	21
1786	Facebook	Male	50's	Almost everyday	3	5	3	4	5	2	6	28
1787	Facebook	Female	30's	Less than once a month	2	6	3	3	4	3	4	25
1788	Facebook	Male	40's	Once every few days	4	3	3	3	4	4	3	24
1789	Facebook	Male	50's	Once every few days	2	3	2	1	2	1	2	13
1790	Facebook	Male	40's	Once a month	4	4	4	4	4	4	4	28
1791	Facebook	Female	20's	Rarely	3	5	3	3	3	4	5	26
1792	Facebook	Female	40's	Almost everyday	3	5	3	4	5	4	5	29
1793	Facebook	Male	30's	Rarely	3	5	6	4	4	4	3	29
1794	Facebook	Female	60's	Once every few days	4	5	3	6	3	5	4	30
1795	Facebook	Female	30's	Once every few days	2	5	6	4	3	4	3	27
1796	Facebook	Male	50's	Once every few days	5	3	6	6	4	4	3	31
1797	Facebook	Female	40's	Almost everyday	3	5	3	4	4	4	2	25
1798	Facebook	Female	40's	Almost everyday	3	5	3	5	2	3	6	27
1799	Instagram	Male	40's	Once a month	5	3	3	3	3	4	4	25
1800	Instagram	Male	50's	Rarely	4	4	5	1	5	4	4	27
1801	Instagram	Male	40's	Less than once a month	4	4	4	3	4	4	4	27
1802	Instagram	Female	40's	Almost everyday	6	2	6	6	3	3	7	33
1803	Instagram	Male	30's	Once a month	2	3	4	3	3	4	4	23
1804	Instagram	Female	40's	Once every few days	3	3	3	2	5	4	5	25
1805	Instagram	Male	40's	Almost everyday	2	7	2	3	6	3	5	28
1806	Instagram	Male	40's	Once a month	5	3	5	4	4	4	5	30
1807	Instagram	Male	50's	Once every few days	3	3	3	3	4	4	4	24
1808	Instagram	Male	50's	Rarely	3	5	3	3	4	3	5	26
1809	Instagram	Female	50's	Almost everyday	3	3	3	3	4	4	5	25
1810	Instagram	Male	50's	Once a month	3	4	2	2	5	2	2	20
1811	Instagram	Male	70's~	Almost everyday	4	2	3	4	3	3	4	23
1812	Instagram	Male	50's	Less than once a month	4	3	3	3	5	5	4	27
1813	Instagram	Male	50's	Rarely	5	3	5	4	4	5	4	30
1814	Instagram	Male	40's	Less than once a month	3	4	3	4	4	3	4	25
1815	Instagram	Male	50's	Once every few days	2	2	4	2	3	4	6	23
1816	Instagram	Male	40's	Once every few days	4	4	4	4	4	4	4	28
1817	Instagram	Male	50's	Once every few days	5	4	4	3	4	4	4	28
1818	Instagram	Male	50's	Rarely	4	4	4	5	4	4	4	29
1819	Instagram	Male	50's	Once every few days	5	3	5	3	5	3	4	28
1820	Instagram	Male	50's	Rarely	5	4	5	4	5	3	3	29
1821	Instagram	Female	30's	Almost everyday	2	5	1	1	4	4	4	21
1822	Instagram	Male	40's	Once every few days	4	5	4	3	5	4	5	30
1823	Instagram	Male	40's	Almost everyday	3	4	3	5	5	4	5	29
1824	Instagram	Female	30's	Just created an account	2	2	1	1	4	3	6	19
1825	Instagram	Male	50's	Rarely	4	4	4	4	4	4	4	28
1826	Instagram	Female	30's	Once every few days	3	5	3	4	5	3	5	28
1827	Instagram	Female	40's	Almost everyday	5	3	4	3	3	4	5	27
1828	Instagram	Male	40's	Once a month	3	3	3	4	4	4	4	25
1829	Instagram	Female	50's	Rarely	7	7	4	1	5	4	4	32
1830	Instagram	Female	50's	Once a month	5	3	4	4	5	3	4	28
1831	Instagram	Female	40's	Once every few days	5	4	3	4	4	4	4	28
1832	Instagram	Female	40's	Less than once a month	2	3	3	2	3	3	2	18
1833	Instagram	Male	40's	Rarely	4	5	3	3	5	3	4	27
1834	Instagram	Male	40's	Once every few days	5	3	5	3	5	3	3	27
1835	Instagram	Female	50's	Rarely	3	4	3	2	3	3	5	23
1836	Instagram	Male	50's	Once every few days	2	3	2	2	3	2	2	16
1837	Instagram	Male	50's	Once every few days	6	1	3	2	3	5	4	24
1838	Instagram	Female	40's	Almost everyday	4	5	3	1	3	1	5	22
1839	Instagram	Male	40's	Once a month	2	2	3	3	3	3	4	20
1840	Instagram	Male	50's	Once every few days	7	5	3	3	3	5	4	30
1841	Instagram	Male	40's	Just created an account	4	4	4	4	4	4	4	28
1842	Instagram	Female	40's	Once every few days	3	3	3	3	3	3	2	20
1843	Instagram	Female	40's	Almost everyday	4	4	4	4	3	5	4	28
1844	Instagram	Male	50's	Almost everyday	3	3	3	5	3	4	5	26
1845	Instagram	Male	30's	Almost everyday	7	1	6	5	3	5	6	33
1846	Instagram	Female	40's	Rarely	4	4	4	4	4	4	1	25
1847	Instagram	Male	40's	Just created an account	3	4	3	1	4	4	4	23
1848	Instagram	Male	30's	Once every few days	3	2	4	3	2	4	3	21
1849	Instagram	Male	40's	Less than once a month	5	4	5	4	5	4	4	31
1850	Instagram	Male	30's	Just created an account	1	5	1	4	5	1	6	23
1851	Instagram	Male	40's	Almost everyday	5	3	6	3	4	5	5	31
1852	Instagram	Male	40's	Rarely	5	3	5	3	4	4	3	27
1853	Instagram	Female	30's	Once every few days	3	3	3	3	5	4	4	25
1854	Instagram	Female	30's	Once every few days	4	4	4	3	3	3	5	26
1855	Instagram	Male	40's	Once a month	2	4	2	2	2	5	4	21
1856	Instagram	Male	40's	Just created an account	7	2	7	2	6	2	1	27
1857	Instagram	Male	40's	Almost everyday	4	3	4	4	5	4	5	29
1858	Instagram	Male	50's	Once a month	3	4	3	5	3	4	4	26
1859	Instagram	Male	40's	Once every few days	3	3	3	2	3	5	3	22
1860	Instagram	Male	50's	Less than once a month	5	2	3	3	4	4	3	24
1861	Instagram	Female	30's	Almost everyday	3	5	3	4	2	4	5	26
1862	Instagram	Female	40's	Once every few days	4	5	4	3	3	3	3	25
1863	Instagram	Female	40's	Less than once a month	3	2	4	4	3	7	6	29
1864	Instagram	Male	40's	Rarely	4	1	3	4	1	4	4	21
1865	Instagram	Male	50's	Almost everyday	6	2	3	5	4	6	2	28
1866	Instagram	Male	40's	Almost everyday	5	5	3	4	5	3	4	29
1867	Instagram	Female	30's	Almost everyday	5	5	3	4	5	3	5	30
1868	Instagram	Male	40's	Once every few days	3	3	4	4	4	4	4	26
1869	Instagram	Male	50's	Once every few days	4	4	3	4	3	3	3	24
1870	Instagram	Female	20's	Almost everyday	2	5	4	6	3	5	5	30
1871	Instagram	Female	20's	Almost everyday	3	4	4	2	4	3	5	25
1872	Instagram	Male	50's	Once every few days	4	4	4	4	4	4	4	28
1873	Instagram	Female	40's	Once every few days	5	5	2	4	4	5	3	28
1874	Instagram	Female	40's	Almost everyday	2	6	2	2	5	4	5	26
1875	Instagram	Female	40's	Once every few days	3	4	3	3	4	5	4	26
1876	Instagram	Male	50's	Almost everyday	7	1	5	2	6	3	3	27
1877	Instagram	Male	50's	Less than once a month	5	5	3	5	5	5	5	33
1878	Instagram	Male	30's	Once every few days	3	3	3	3	3	3	6	24
1879	Instagram	Male	40's	Once every few days	3	5	2	2	4	3	4	23
1880	Instagram	Male	50's	Once every few days	5	4	4	5	4	4	4	30
1881	Instagram	Male	50's	Rarely	3	4	3	3	4	3	4	24
1882	Instagram	Female	40's	Once every few days	4	5	4	4	4	4	5	30
1883	Instagram	Male	40's	Just created an account	4	2	2	1	2	4	1	16
1884	Instagram	Male	50's	Once every few days	3	5	3	4	3	5	5	28
1885	Instagram	Male	40's	Once every few days	4	6	4	5	5	4	4	32
1886	Instagram	Female	40's	Rarely	4	4	4	3	5	3	3	26
1887	Instagram	Male	40's	Just created an account	4	4	4	4	4	4	4	28
1888	Instagram	Female	50's	Almost everyday	4	4	3	3	3	4	2	23
1889	Instagram	Male	30's	Almost everyday	4	4	4	4	4	4	4	28
1890	Instagram	Female	30's	Almost everyday	4	3	3	4	4	3	3	24
1891	Instagram	Male	40's	Once a month	2	2	3	1	6	4	1	19
1892	Instagram	Male	50's	Once every few days	5	3	5	4	4	4	4	29
1893	Instagram	Female	30's	Less than once a month	2	1	3	2	1	4	4	17
1894	Instagram	Male	50's	Once every few days	5	3	4	3	4	3	3	25
1895	Instagram	Female	20's	Almost everyday	3	5	2	4	3	4	5	26
1896	Instagram	Male	50's	Rarely	2	4	2	2	2	1	4	17
1897	Instagram	Male	60's	Once every few days	6	3	5	4	4	3	4	29
1898	Instagram	Female	40's	Once a month	4	5	3	5	3	4	4	28
1899	Instagram	Male	40's	Rarely	6	1	5	5	4	4	4	29
1900	Instagram	Female	40's	Once every few days	3	2	4	2	4	4	4	23
1901	Instagram	Male	50's	Once every few days	4	4	3	3	4	4	4	26
1902	Instagram	Male	60's	Once every few days	7	5	3	2	4	2	4	27
1903	Instagram	Female	50's	Once every few days	3	4	3	3	4	4	4	25
1904	Instagram	Female	30's	Less than once a month	3	4	3	3	3	3	5	24
1905	Instagram	Male	30's	Once a month	7	1	1	3	7	2	2	23
1906	Instagram	Male	30's	Rarely	5	5	5	3	5	3	3	29
1907	Instagram	Female	50's	Once a month	6	3	3	2	3	4	4	25
1908	Instagram	Male	50's	Rarely	1	4	1	4	4	4	4	22
1909	Instagram	Male	30's	Rarely	2	3	4	3	3	4	4	23
1910	Instagram	Female	50's	Less than once a month	4	4	2	3	4	6	1	24
1911	Instagram	Male	50's	Rarely	4	4	5	5	3	3	3	27
1912	Instagram	Male	40's	Once a month	3	3	2	3	4	4	4	23
1913	Instagram	Male	40's	Rarely	4	3	4	5	5	4	3	28
1914	Instagram	Male	40's	Less than once a month	5	2	5	3	3	5	5	28
1915	Instagram	Male	30's	Once every few days	6	3	3	4	5	3	5	29
1916	Instagram	Female	40's	Almost everyday	5	4	3	4	4	3	3	26
1917	Instagram	Female	30's	Once every few days	3	4	3	4	4	4	5	27
1918	Instagram	Female	50's	Almost everyday	5	4	5	4	3	3	3	27
1919	Instagram	Female	40's	Almost everyday	4	4	2	4	3	4	4	25
1920	Instagram	Male	40's	Less than once a month	4	5	3	5	5	4	5	31
1921	Instagram	Male	50's	Rarely	4	4	2	2	4	4	4	24
1922	Instagram	Male	40's	Rarely	2	2	6	2	3	3	3	21
1923	Instagram	Male	40's	Once a month	5	4	3	3	4	4	5	28
1924	Instagram	Male	30's	Once a month	2	4	3	2	3	3	2	19
1925	Instagram	Female	40's	Rarely	6	3	6	3	6	2	3	29
1926	Instagram	Male	40's	Once every few days	5	2	3	4	5	4	2	25
1927	Instagram	Male	30's	Less than once a month	4	3	4	3	4	4	6	28
1928	Instagram	Male	40's	Once every few days	4	5	5	4	4	2	5	29
1929	Instagram	Male	60's	Rarely	6	5	6	5	6	6	5	39
1930	Instagram	Female	50's	Rarely	1	3	3	2	1	2	3	15
1931	Instagram	Male	30's	Once every few days	3	4	3	3	5	3	5	26
1932	Instagram	Female	30's	Once every few days	3	5	3	2	3	3	3	22
1933	Instagram	Female	40's	Once every few days	4	3	4	4	3	4	5	27
1934	Instagram	Female	50's	Almost everyday	4	1	1	1	5	4	1	17
1935	Instagram	Male	40's	Once every few days	3	4	3	3	4	4	4	25
1936	Instagram	Male	30's	Once a month	7	7	3	7	2	7	7	40
1937	Instagram	Male	40's	Once every few days	4	1	4	4	5	4	4	26
1938	Instagram	Male	40's	Less than once a month	6	3	3	4	3	4	5	28
1939	Instagram	Male	40's	Once a month	4	4	4	4	4	4	4	28
1940	Instagram	Male	60's	Almost everyday	7	1	7	4	4	4	4	31
1941	Instagram	Female	20's	Less than once a month	3	3	2	3	2	3	3	19
1942	Instagram	Male	50's	Once every few days	3	4	6	3	5	4	3	28
1943	Instagram	Male	30's	Rarely	1	5	4	2	4	4	4	24
1944	Instagram	Male	50's	Once every few days	3	4	2	4	3	4	5	25
1945	Instagram	Male	40's	Rarely	3	2	2	2	2	5	5	21
1946	Instagram	Female	30's	Almost everyday	4	4	5	3	3	4	4	27
1947	Instagram	Male	50's	Once every few days	4	3	5	3	5	4	4	28
1948	Instagram	Male	50's	Once every few days	3	4	2	1	3	4	4	21
1949	Instagram	Female	40's	Almost everyday	2	3	5	2	5	5	6	28
1950	Instagram	Male	40's	Less than once a month	5	3	4	3	5	3	3	26
1951	Instagram	Female	30's	Almost everyday	3	3	4	4	4	4	4	26
1952	Instagram	Male	40's	Almost everyday	4	4	4	4	4	4	5	29
1953	Instagram	Male	40's	Once every few days	3	5	3	4	5	5	5	30
1954	Instagram	Male	40's	Almost everyday	3	4	4	5	4	3	4	27
1955	Instagram	Male	20's	Once a month	6	2	3	5	3	6	4	29
1956	Instagram	Male	50's	Once every few days	4	3	3	2	4	2	5	23
1957	Instagram	Male	40's	Once every few days	5	4	4	4	5	4	4	30
1958	Instagram	Female	30's	Less than once a month	5	2	4	3	3	3	4	24
1959	Instagram	Male	40's	Almost everyday	5	6	4	6	6	4	6	37
1960	Instagram	Male	40's	Rarely	5	4	4	3	3	4	4	27
1961	Instagram	Male	60's	Rarely	4	4	3	4	2	4	4	25
1962	Instagram	Male	40's	Almost everyday	4	6	2	3	5	2	7	29
1963	Instagram	Male	40's	Once every few days	2	2	2	3	4	3	3	19
1964	Instagram	Female	30's	Once a month	6	4	5	3	5	5	2	30
1965	Instagram	Female	30's	Less than once a month	5	4	3	4	5	4	4	29
1966	Instagram	Male	30's	Once every few days	4	4	4	4	4	4	4	28
1967	Instagram	Male	40's	Almost everyday	6	2	6	4	5	2	4	29
1968	Instagram	Female	30's	Once every few days	1	3	1	1	3	1	3	13
1969	Instagram	Female	30's	Almost everyday	6	6	5	5	6	6	6	40
1970	Instagram	Male	20's	Once every few days	5	3	4	5	6	4	3	30
1971	Instagram	Male	30's	Almost everyday	5	5	5	4	5	4	5	33
1972	Instagram	Male	40's	Once a month	6	1	7	3	2	6	7	32
1973	Instagram	Male	50's	Once every few days	3	3	5	3	5	3	5	27
1974	Instagram	Female	50's	Almost everyday	3	5	4	4	5	4	5	30
1975	Instagram	Female	30's	Once every few days	2	6	3	3	5	4	6	29
1976	Instagram	Female	30's	Rarely	2	3	3	3	4	3	6	24
1977	Instagram	Male	40's	Once a month	4	4	4	5	4	4	4	29
1978	Instagram	Female	30's	Rarely	5	2	3	2	4	3	6	25
1979	Instagram	Male	40's	Rarely	4	5	3	3	4	4	3	26
1980	Instagram	Female	40's	Once every few days	7	6	6	5	3	7	7	41
1981	Instagram	Male	40's	Once a month	5	1	5	2	3	4	3	23
1982	Instagram	Female	40's	Once every few days	4	4	3	4	6	5	6	32
1983	Instagram	Male	20's	Once every few days	5	4	2	4	5	4	5	29
1984	Instagram	Female	40's	Rarely	3	5	3	5	3	3	5	27
1985	Instagram	Male	60's	Once a month	5	3	5	4	3	4	4	28
1986	Instagram	Male	30's	Almost everyday	5	5	3	4	5	3	4	29
1987	Instagram	Male	40's	Once every few days	4	4	4	4	4	4	4	28
1988	Instagram	Male	40's	Almost everyday	3	5	3	3	4	5	5	28
1989	Instagram	Male	40's	Rarely	3	4	4	4	4	4	5	28
1990	Instagram	Female	40's	Once a month	5	3	2	3	2	2	3	20
1991	Instagram	Male	50's	Less than once a month	4	3	5	5	3	4	4	28
1992	Instagram	Male	30's	Once every few days	2	4	3	2	3	3	5	22
1993	Instagram	Male	30's	Once a month	5	3	5	3	4	4	4	28
1994	Instagram	Male	50's	Once a month	3	5	3	3	2	2	1	19
1995	Instagram	Male	40's	Almost everyday	3	4	5	4	3	5	5	29
1996	Instagram	Male	40's	Almost everyday	6	1	4	6	3	5	5	30
1997	Instagram	Male	40's	Almost everyday	3	4	4	3	4	4	4	26
1998	Instagram	Male	30's	Almost everyday	7	5	3	1	5	1	5	27
1999	Instagram	Female	40's	Once a month	4	4	4	4	4	3	4	27
[truncated: 7,599 more rows]

## Sheet: Social media Index
No.	Socialmedia	Openness	Flow	Interaction with a stranger	Anonimity	Self disclosure	Interaction level	Media richness
1	Twitter	5	4	6	5	3	6	4
2	Twitter	3	7	6	4	3	3	1
3	Twitter	3	6	4	3	4	6	2
4	Twitter	3	4	4	6	2	5	2
5	Twitter	6	6	5	6	5	6	6
6	Twitter	4	4	4	4	4	3	4
7	Twitter	4	7	3	4	6	4	6
8	Twitter	4	7	6	2	6	5	3
9	Twitter	4	6	7	7	6	6	6
10	Twitter	4	2	3	4	3	3	4
11	Twitter	5	6	7	5	5	5	5
12	Twitter	5	4	5	5	3	5	3
13	Twitter	1	4	5	4	4	7	4
14	Twitter	2	2	7	4	7	6	2
15	Twitter	4	5	7	3	6	7	7
16	Twitter	3	7	4	3	6	7	7
17	Twitter	5	4	5	3	3	3	3
18	Twitter	3	5	6	4	1	5	3
19	Twitter	2	3	6	3	3	2	2
20	Twitter	7	2	4	5	4	5	3
21	Twitter	4	4	5	4	3	5	3
22	Twitter	4	4	5	5	5	5	6
23	Twitter	4	5	3	3	5	4	6
25	Twitter	1	7	6	5	2	6	3
26	Twitter	3	5	5	5	2	4	2
27	Twitter	5	6	5	5	5	5	5
28	Twitter	4	6	5	4	5	6	5
29	Twitter	6	6	3	6	7	7	6
30	Twitter	6	6	5	4	1	6	4
31	Twitter	1	2	2	5	5	6	2
32	Twitter	1	7	6	7	1	2	3
33	Twitter	5	3	6	2	4	3	3
34	Twitter	7	7	6	4	7	7	7
35	Twitter	7	6	5	3	5	6	4
36	Twitter	4	5	4	2	3	4	4
37	Twitter	7	4	6	5	6	6	6
38	Twitter	3	6	2	6	6	6	6
39	Twitter	5	6	3	6	2	6	3
40	Twitter	1	4	6	5	1	6	6
41	Twitter	4	4	5	2	5	6	5
42	Twitter	4	4	4	4	4	4	4
43	Twitter	3	5	5	3	5	5	3
44	Twitter	6	6	5	6	6	6	6
45	Twitter	6	2	4	5	4	6	3
46	Twitter	4	4	4	4	4	4	4
47	Twitter	5	5	6	6	5	6	6
48	Twitter	6	5	5	4	6	6	5
49	Twitter	4	4	5	6	5	5	3
50	Twitter	4	5	5	4	5	6	5
51	Twitter	5	3	6	6	6	6	6
52	Twitter	4	5	5	4	3	5	4
53	Twitter	4	3	5	5	5	5	5
54	Twitter	5	1	6	6	7	5	6
55	Twitter	3	5	4	5	4	5	3
56	Twitter	3	5	1	3	6	6	6
57	Twitter	6	6	5	6	2	6	6
58	Twitter	5	5	4	3	3	4	4
59	Twitter	5	4	4	5	6	6	5
60	Twitter	6	6	6	6	5	6	5
61	Twitter	5	5	4	3	6	6	6
62	Twitter	7	7	7	1	6	2	3
63	Twitter	6	5	6	6	7	6	6
64	Twitter	5	6	5	4	4	5	6
65	Twitter	2	6	3	4	5	5	5
66	Twitter	6	6	7	6	5	5	6
67	Twitter	5	5	5	5	2	5	2
68	Twitter	5	6	3	5	5	5	5
69	Twitter	7	7	7	7	1	7	4
70	Twitter	7	6	1	1	7	7	7
71	Twitter	4	5	6	4	1	3	5
72	Twitter	4	3	3	5	5	3	4
73	Twitter	3	5	6	2	6	6	6
74	Twitter	4	4	5	5	5	5	3
75	Twitter	5	6	2	7	7	6	7
76	Twitter	5	5	3	3	5	6	6
77	Twitter	6	5	6	4	7	6	6
78	Twitter	6	7	5	5	6	3	5
79	Twitter	7	3	7	2	5	7	7
80	Twitter	5	5	3	2	6	5	4
81	Twitter	1	7	1	7	1	1	1
82	Twitter	5	6	6	4	5	5	5
83	Twitter	5	7	5	5	7	6	2
84	Twitter	5	3	5	3	5	5	5
85	Twitter	5	4	3	5	5	2	6
86	Twitter	5	3	6	3	5	6	5
87	Twitter	2	5	4	5	6	5	7
88	Twitter	7	7	7	7	7	7	7
89	Twitter	4	5	5	4	5	4	4
90	Twitter	5	5	6	7	2	2	7
91	Twitter	6	2	7	2	6	6	6
92	Twitter	5	5	6	4	3	5	5
93	Twitter	7	7	7	7	1	7	7
94	Twitter	7	3	6	4	5	5	5
95	Twitter	6	7	6	1	6	7	7
96	Twitter	4	6	4	6	5	6	6
97	Twitter	5	6	5	4	6	3	6
98	Twitter	5	5	4	3	3	4	4
99	Twitter	3	4	2	3	3	3	5
100	Twitter	5	5	6	5	5	6	4
101	Twitter	3	3	5	3	5	5	3
102	Twitter	6	7	7	7	6	7	7
103	Twitter	2	6	4	6	5	2	6
104	Twitter	2	6	6	6	5	6	5
105	Twitter	6	6	6	5	3	5	5
106	Twitter	7	7	7	7	7	7	7
107	Twitter	6	4	4	3	4	5	3
108	Twitter	6	1	4	3	1	1	4
109	Twitter	5	5	6	6	2	2	5
110	Twitter	6	6	2	5	5	6	4
111	Twitter	7	1	6	6	6	6	7
112	Twitter	5	3	5	3	6	5	6
113	Twitter	2	5	3	4	5	5	2
114	Twitter	4	4	4	5	7	5	4
115	Twitter	3	6	4	6	5	5	2
116	Twitter	4	6	7	1	6	7	7
117	Twitter	6	6	5	5	6	7	7
118	Twitter	7	3	5	2	3	4	4
119	Twitter	5	5	5	3	5	5	5
120	Twitter	6	6	6	5	2	2	5
121	Twitter	7	2	6	4	4	5	5
122	Twitter	5	5	3	3	5	5	6
123	Twitter	5	5	4	5	4	3	5
124	Twitter	4	6	4	3	5	6	5
125	Twitter	4	1	4	7	4	4	4
126	Twitter	3	4	4	4	4	5	4
127	Twitter	2	3	5	6	6	6	6
128	Twitter	3	4	4	5	3	4	4
129	Twitter	6	7	6	6	3	3	5
130	Twitter	5	6	6	4	2	7	6
131	Twitter	3	6	6	5	5	6	6
132	Twitter	7	7	7	7	7	5	7
133	Twitter	5	4	7	7	6	5	2
134	Twitter	4	7	7	6	1	6	4
135	Twitter	5	3	5	2	5	3	6
136	Twitter	3	4	5	5	5	5	5
137	Twitter	5	4	5	3	4	5	5
138	Twitter	6	6	5	4	6	6	7
139	Twitter	3	4	6	5	4	5	4
140	Twitter	4	7	6	6	5	7	6
141	Twitter	5	5	3	5	4	7	5
142	Twitter	4	5	5	3	3	6	6
143	Twitter	6	1	2	6	6	6	6
144	Twitter	6	5	4	6	5	5	5
145	Twitter	6	4	4	5	6	6	7
146	Twitter	5	4	6	5	3	6	5
147	Twitter	7	6	7	7	5	3	5
148	Twitter	4	7	4	7	4	7	7
149	Twitter	2	7	7	7	7	7	3
150	Twitter	4	6	6	4	7	7	7
151	Twitter	5	4	7	7	6	5	2
152	Twitter	4	5	6	4	3	5	3
153	Twitter	6	6	6	4	6	5	6
154	Twitter	1	7	5	3	3	5	4
155	Twitter	5	2	5	2	6	6	6
156	Twitter	5	6	4	4	6	5	6
157	Twitter	3	3	3	6	1	6	2
158	Twitter	7	7	7	5	6	3	6
159	Twitter	3	5	5	4	2	5	5
160	Twitter	1	6	4	6	1	3	2
161	Twitter	7	6	6	6	6	6	6
162	Twitter	6	6	6	6	6	6	7
163	Twitter	7	5	7	1	1	1	7
164	Twitter	5	5	7	6	7	3	5
165	Twitter	7	7	7	4	4	4	7
166	Twitter	4	4	5	4	5	5	5
167	Twitter	6	5	6	7	4	6	6
168	Twitter	6	6	7	2	6	7	5
169	Twitter	6	6	6	7	6	7	7
170	Twitter	7	5	5	4	7	6	6
171	Twitter	4	6	6	6	2	6	5
172	Twitter	6	6	3	6	1	4	6
173	Twitter	6	4	6	4	6	7	7
174	Twitter	7	7	7	4	7	6	7
175	Twitter	6	3	7	5	1	4	3
176	Twitter	6	5	6	6	7	6	6
177	Twitter	7	6	3	2	4	3	6
178	Twitter	4	6	4	5	4	7	4
179	Twitter	3	6	5	5	6	5	6
180	Twitter	4	6	6	6	1	6	6
181	Twitter	6	6	7	6	6	4	6
182	Twitter	3	6	6	6	2	6	6
183	Twitter	4	7	4	4	5	5	5
184	Twitter	2	6	4	5	5	5	6
185	Twitter	3	4	6	3	2	6	3
186	Twitter	6	5	5	4	7	6	5
188	Twitter	5	6	4	3	3	6	3
189	Twitter	6	4	2	1	7	6	6
190	Twitter	7	2	1	6	6	2	6
192	Twitter	4	5	2	1	5	6	5
193	Twitter	7	7	7	4	7	5	7
194	Twitter	7	4	6	4	6	5	6
195	Twitter	4	6	3	7	6	4	7
196	Twitter	1	7	7	7	7	5	7
197	Twitter	6	4	7	5	4	6	6
198	Twitter	1	7	6	7	1	2	3
199	Tik tok	5	3	5	4	6	5	5
200	Tik tok	5	5	5	3	3	4	4
201	Tik tok	6	4	5	2	4	4	4
202	Tik tok	3	3	4	3	3	3	3
203	Tik tok	4	5	4	5	4	5	4
204	Tik tok	3	5	4	4	4	5	3
205	Tik tok	5	3	3	3	6	3	5
206	Tik tok	5	5	5	3	6	5	4
207	Tik tok	5	4	5	3	5	5	4
208	Tik tok	7	6	6	4	4	5	5
209	Tik tok	5	3	6	2	6	6	6
210	Tik tok	4	4	5	5	4	4	4
211	Tik tok	7	1	7	7	7	7	7
212	Tik tok	6	2	4	1	1	2	4
213	Tik tok	5	6	4	5	4	3	5
214	Tik tok	6	2	6	2	1	3	7
215	Tik tok	6	3	6	4	3	5	3
216	Tik tok	5	3	4	2	5	5	5
217	Tik tok	5	2	6	4	6	2	5
218	Tik tok	3	4	3	4	4	5	5
220	Tik tok	4	3	4	4	2	3	5
221	Tik tok	5	2	5	4	6	4	3
223	Tik tok	7	7	5	1	6	5	1
224	Tik tok	7	3	5	2	3	4	7
225	Tik tok	6	3	6	4	6	6	4
226	Tik tok	7	2	7	4	7	1	1
227	Tik tok	7	2	1	1	7	7	3
228	Tik tok	5	6	2	2	6	4	6
229	Tik tok	5	4	3	3	4	6	3
230	Tik tok	2	4	5	2	3	3	1
231	Tik tok	6	6	6	6	7	4	2
232	Tik tok	4	4	4	4	4	4	4
233	Tik tok	6	2	6	5	6	4	5
234	Tik tok	4	4	4	4	4	4	4
236	Tik tok	5	3	3	3	6	5	7
237	Tik tok	6	2	6	4	5	4	4
238	Tik tok	4	6	6	4	6	4	3
239	Tik tok	7	4	2	2	1	4	5
240	Tik tok	3	4	5	5	4	3	6
242	Tik tok	3	5	5	5	3	5	4
243	Tik tok	5	3	5	3	5	5	3
244	Tik tok	6	2	5	3	6	3	3
245	Tik tok	7	6	7	6	1	7	7
246	Tik tok	4	4	4	4	4	4	4
247	Tik tok	4	3	3	2	6	6	5
248	Tik tok	5	3	5	5	5	3	3
249	Tik tok	6	4	7	4	4	7	4
250	Tik tok	7	7	7	1	7	7	5
251	Tik tok	6	6	7	2	6	4	2
252	Tik tok	6	6	6	4	7	4	5
253	Tik tok	3	5	5	5	4	5	4
254	Tik tok	5	5	3	5	5	5	5
255	Tik tok	3	4	5	5	4	4	4
256	Tik tok	3	6	3	5	5	5	6
257	Tik tok	4	4	5	4	4	3	3
259	Tik tok	6	5	5	4	6	5	4
260	Tik tok	6	5	6	3	5	6	3
261	Tik tok	4	3	4	4	4	4	3
262	Tik tok	6	4	6	4	6	5	4
263	Tik tok	4	5	2	2	6	4	5
264	Tik tok	6	4	5	2	2	6	7
265	Tik tok	5	3	6	5	6	5	6
266	Tik tok	6	6	6	6	2	2	6
267	Tik tok	7	2	7	4	6	7	7
268	Tik tok	6	2	7	4	6	3	2
269	Tik tok	4	4	6	4	2	4	4
270	Tik tok	5	5	5	3	5	3	6
271	Tik tok	6	5	6	3	6	5	2
272	Tik tok	6	6	6	3	4	4	6
273	Tik tok	3	5	7	4	4	6	5
274	Tik tok	6	5	6	6	6	5	4
275	Tik tok	4	4	4	4	4	4	4
276	Tik tok	4	4	6	5	5	4	4
277	Tik tok	6	2	6	1	6	2	2
278	Tik tok	4	4	4	4	4	4	4
279	Tik tok	3	5	4	4	4	4	4
280	Tik tok	4	6	4	5	4	5	5
281	Tik tok	7	5	3	5	5	6	6
282	Tik tok	5	5	5	2	6	4	3
283	Tik tok	5	4	4	3	4	4	6
284	Tik tok	6	7	5	1	6	4	2
285	Tik tok	7	5	7	6	6	6	4
286	Tik tok	4	4	2	4	5	3	4
287	Tik tok	6	5	5	4	6	5	5
288	Tik tok	4	4	4	3	1	6	7
289	Tik tok	6	4	5	5	5	3	3
290	Tik tok	7	1	1	3	7	3	5
291	Tik tok	6	5	5	5	6	6	4
292	Tik tok	5	4	4	5	5	5	3
293	Tik tok	4	4	6	3	3	5	2
294	Tik tok	5	5	4	5	5	3	3
295	Tik tok	4	5	3	4	5	4	5
296	Tik tok	5	6	5	3	6	5	5
297	Tik tok	5	3	2	3	5	5	6
298	Tik tok	4	4	4	4	3	5	4
299	Tik tok	6	4	4	2	7	7	6
300	Tik tok	4	4	4	4	4	4	4
301	Tik tok	4	4	6	4	2	4	4
302	Tik tok	2	6	5	3	5	5	5
304	Tik tok	4	5	6	4	3	4	2
305	Tik tok	6	1	2	2	6	7	7
306	Tik tok	6	6	3	6	5	5	5
307	Tik tok	3	2	6	5	1	5	5
308	Tik tok	5	5	4	5	5	6	5
309	Tik tok	5	6	6	4	6	6	4
310	Tik tok	6	4	6	4	3	5	3
311	Tik tok	5	4	4	3	4	4	4
312	Tik tok	6	5	5	2	6	6	6
313	Tik tok	6	3	5	3	6	3	3
314	Tik tok	5	5	3	2	6	3	5
315	Tik tok	6	6	3	3	5	6	3
316	Tik tok	4	3	2	5	5	5	3
317	Tik tok	6	4	6	3	6	4	6
318	Tik tok	2	5	2	5	4	5	5
319	Tik tok	6	6	3	5	6	4	3
320	Tik tok	4	3	2	5	5	5	3
321	Tik tok	6	2	6	3	6	2	5
323	Tik tok	3	4	4	4	4	4	4
324	Tik tok	4	4	4	4	4	4	4
325	Tik tok	5	4	6	3	6	6	5
326	Tik tok	5	3	5	2	6	5	5
328	Tik tok	4	5	4	4	3	3	4
329	Tik tok	4	4	4	4	4	4	5
330	Tik tok	4	5	5	5	2	6	2
331	Tik tok	5	2	5	6	5	5	5
332	Tik tok	3	5	5	4	4	3	3
333	Tik tok	4	4	4	7	7	4	4
335	Tik tok	1	3	7	1	2	6	1
336	Tik tok	5	3	2	3	1	3	4
337	Tik tok	5	2	2	2	5	3	3
338	Tik tok	6	4	3	4	7	4	4
339	Tik tok	2	6	4	5	5	6	5
340	Tik tok	3	4	4	5	3	5	4
341	Tik tok	6	4	6	4	6	5	4
342	Tik tok	4	6	5	6	3	3	3
343	Tik tok	5	4	6	2	6	4	4
344	Tik tok	7	4	6	2	7	3	3
345	Tik tok	4	4	3	3	5	5	4
347	Tik tok	2	6	2	3	4	6	2
348	Tik tok	4	5	6	6	2	5	4
349	Tik tok	2	6	2	6	1	6	1
350	Tik tok	5	6	5	2	7	2	2
351	Tik tok	6	5	6	2	6	4	7
352	Tik tok	5	5	4	4	4	4	5
353	Tik tok	6	3	5	2	2	3	5
354	Tik tok	4	5	5	4	4	5	3
355	Tik tok	7	4	4	3	7	6	1
356	Tik tok	7	4	5	3	6	4	5
359	Tik tok	4	3	4	5	4	4	3
360	Tik tok	5	4	6	2	6	4	5
361	Tik tok	5	5	2	3	6	6	5
362	Tik tok	3	5	6	6	2	5	3
363	Tik tok	3	4	4	4	4	4	5
364	Tik tok	6	6	6	2	6	6	6
365	Tik tok	4	4	4	4	3	4	4
366	Tik tok	2	7	6	7	2	6	2
367	Tik tok	6	2	7	7	7	1	4
368	Tik tok	3	5	7	3	6	6	5
369	Tik tok	4	5	4	4	4	4	4
370	Tik tok	5	4	5	3	5	5	5
371	Tik tok	7	4	7	1	7	7	7
372	Tik tok	4	4	5	5	4	5	5
373	Tik tok	5	5	6	3	5	5	3
374	Tik tok	5	5	5	4	4	4	4
375	Tik tok	3	4	6	3	3	3	3
376	Tik tok	5	5	5	5	4	5	5
377	Tik tok	1	5	6	2	6	6	3
379	Tik tok	7	7	3	2	7	6	1
380	Tik tok	4	6	4	5	4	5	4
381	Tik tok	5	6	3	3	3	3	4
382	Tik tok	4	4	4	4	4	5	5
383	Tik tok	6	5	7	3	6	3	5
384	Tik tok	7	6	6	2	6	4	2
385	Tik tok	6	5	6	4	3	4	2
386	Tik tok	4	3	4	3	5	5	4
387	Tik tok	4	3	4	3	5	5	4
388	Tik tok	7	1	1	1	7	1	7
391	Tik tok	4	4	4	4	4	4	4
392	Tik tok	5	4	3	3	4	3	3
393	Tik tok	7	3	7	3	5	7	6
394	Tik tok	2	4	6	4	1	2	1
395	Tik tok	4	5	6	2	6	6	4
396	Tik tok	3	5	6	1	1	4	3
397	Tik tok	4	4	4	4	4	4	4
398	Tik tok	5	2	3	4	5	3	5
400	Tik tok	4	5	4	1	1	5	4
401	Tik tok	4	5	4	1	1	5	4
402	Tik tok	5	5	4	2	2	6	2
403	Tik tok	7	3	6	3	4	5	3
404	Facebok	5	5	6	4	1	5	3
405	Facebok	3	3	6	6	1	6	5
406	Facebok	5	5	4	5	3	4	3
407	Facebok	2	6	2	1	3	2	4
408	Facebok	2	3	5	2	5	5	2
409	Facebok	3	3	5	3	6	6	6
410	Facebok	5	3	5	5	4	4	3
411	Facebok	6	6	2	6	6	6	5
412	Facebok	6	3	5	5	4	6	3
413	Facebok	7	3	2	1	6	3	4
414	Facebok	7	4	3	1	1	4	5
415	Facebok	7	5	1	1	7	7	5
416	Facebok	3	4	5	3	4	4	4
417	Facebok	2	3	4	2	5	4	5
418	Facebok	4	5	3	6	4	5	2
419	Facebok	3	3	4	2	4	3	3
420	Facebok	5	3	4	2	6	6	6
421	Facebok	4	4	4	4	4	4	4
422	Facebok	2	6	6	2	6	6	6
423	Facebok	2	5	4	2	6	7	4
424	Facebok	5	6	2	2	5	6	5
425	Facebok	4	4	4	4	4	4	4
426	Facebok	3	3	2	2	5	3	3
427	Facebok	3	4	1	3	6	6	3
428	Facebok	5	4	5	6	3	4	3
429	Facebok	5	3	3	5	5	3	5
430	Facebok	3	3	1	2	2	4	4
431	Facebok	2	6	3	2	6	6	6
432	Facebok	4	3	5	3	6	4	5
434	Facebok	2	2	7	1	1	1	5
435	Facebok	7	6	2	1	7	1	6
436	Facebok	2	1	1	1	6	4	5
437	Facebok	4	4	5	3	5	4	4
438	Facebok	5	5	2	2	4	3	3
439	Facebok	5	1	2	3	7	5	2
440	Facebok	2	6	6	3	6	6	6
441	Facebok	5	4	5	3	4	5	4
442	Facebok	5	3	3	1	6	4	4
443	Facebok	2	5	4	5	5	3	2
444	Facebok	2	6	6	2	5	6	6
445	Facebok	3	6	3	2	2	6	5
446	Facebok	5	5	3	4	5	5	4
447	Facebok	3	5	5	2	6	6	4
448	Facebok	7	7	5	6	3	5	4
449	Facebok	2	1	1	1	4	1	2
450	Facebok	2	6	2	6	5	6	5
451	Facebok	5	5	4	6	4	5	7
452	Facebok	2	3	2	6	4	6	5
453	Facebok	4	6	4	2	6	2	5
454	Facebok	6	5	4	3	7	7	6
455	Facebok	3	4	5	5	6	5	6
456	Facebok	3	5	3	2	7	7	5
457	Facebok	5	3	3	2	6	5	5
458	Facebok	2	5	5	4	5	5	5
459	Facebok	3	6	2	1	6	5	5
460	Facebok	4	5	4	3	5	5	5
461	Facebok	5	5	6	4	4	4	4
462	Facebok	7	3	2	5	5	7	5
463	Facebok	2	6	6	2	6	6	6
464	Facebok	4	4	3	5	4	4	3
465	Facebok	5	4	3	5	5	5	5
466	Facebok	2	6	6	3	4	5	5
467	Facebok	3	3	6	3	5	3	3
468	Facebok	1	3	7	6	6	7	6
469	Facebok	3	2	2	5	6	4	3
470	Facebok	6	5	5	3	4	4	5
471	Facebok	3	5	6	2	1	5	5
472	Facebok	4	6	6	2	5	6	3
473	Facebok	5	3	4	5	4	5	4
474	Facebok	5	6	3	2	6	7	4
475	Facebok	3	3	2	3	5	2	5
476	Facebok	4	4	5	3	4	4	4
477	Facebok	1	6	2	3	6	6	2
478	Facebok	4	4	4	3	5	5	4
479	Facebok	3	4	5	5	4	5	4
480	Facebok	5	6	5	4	4	3	2
481	Facebok	5	3	2	2	6	3	4
482	Facebok	5	3	2	6	7	4	2
483	Facebok	5	4	7	3	2	2	1
484	Facebok	5	3	2	2	6	5	6
485	Facebok	3	5	2	1	5	6	6
486	Facebok	4	4	3	1	5	4	4
487	Facebok	4	4	2	4	5	3	4
488	Facebok	3	3	5	4	5	3	4
489	Facebok	7	5	1	1	6	3	4
490	Facebok	5	3	4	4	3	3	3
491	Facebok	5	6	5	4	4	5	2
492	Facebok	3	3	3	3	5	7	3
493	Facebok	5	5	4	4	4	4	4
494	Facebok	1	7	4	4	7	7	3
495	Facebok	5	6	5	5	3	5	3
496	Facebok	5	5	4	5	2	4	2
498	Facebok	7	6	1	1	5	7	6
499	Facebok	2	5	2	2	5	5	3
500	Facebok	5	4	4	4	4	4	4
501	Facebok	6	3	3	1	7	6	5
502	Facebok	2	3	5	2	7	5	5
503	Facebok	4	4	3	2	6	6	6
504	Facebok	7	5	2	7	1	2	5
505	Facebok	6	5	3	1	6	5	3
506	Facebok	4	2	4	4	3	3	4
507	Facebok	6	6	6	1	3	4	3
508	Facebok	4	4	4	4	4	5	4
509	Facebok	1	1	1	2	7	2	6
511	Facebok	4	4	6	6	2	7	3
512	Facebok	2	3	5	2	6	5	5
513	Facebok	5	1	4	1	4	6	3
514	Facebok	4	5	2	2	2	3	5
515	Facebok	5	5	3	2	4	5	4
516	Facebok	3	5	2	4	2	5	5
517	Facebok	3	4	6	2	7	5	6
518	Facebok	4	4	4	3	5	5	5
519	Facebok	4	4	4	3	4	5	4
520	Facebok	5	4	4	4	4	4	4
521	Facebok	6	3	6	2	6	6	2
522	Facebok	4	4	5	3	3	5	5
523	Facebok	7	5	2	4	4	3	2
524	Facebok	6	4	5	5	2	6	6
525	Facebok	6	6	2	2	6	6	6
526	Facebok	6	6	2	2	6	6	6
527	Facebok	5	5	6	5	3	5	3
528	Facebok	2	4	6	3	5	6	3
529	Facebok	4	5	5	3	5	6	5
530	Facebok	5	5	3	2	5	5	5
531	Facebok	3	1	1	2	6	1	6
532	Facebok	4	4	5	4	4	3	4
533	Facebok	5	6	5	3	4	5	3
534	Facebok	6	4	4	6	3	2	3
535	Facebok	5	1	5	3	2	4	5
536	Facebok	5	3	5	3	3	4	4
537	Facebok	3	1	1	2	7	6	7
538	Facebok	3	4	3	3	4	6	4
539	Facebok	3	4	3	2	5	4	4
540	Facebok	3	5	5	5	5	5	5
541	Facebok	5	4	4	4	4	4	3
542	Facebok	6	4	1	7	1	4	4
544	Facebok	6	3	3	2	6	6	6
545	Facebok	2	3	3	2	6	5	4
546	Facebok	5	4	4	5	3	4	2
547	Facebok	3	4	5	2	4	4	4
548	Facebok	4	5	5	4	3	6	2
549	Facebok	6	5	5	3	3	3	4
550	Facebok	4	7	5	2	6	4	4
551	Facebok	5	4	3	3	5	6	3
552	Facebok	3	4	3	2	5	4	5
553	Facebok	2	5	5	1	6	5	5
554	Facebok	5	6	5	2	3	5	3
555	Facebok	5	5	4	6	4	6	5
556	Facebok	1	2	1	3	1	6	6
557	Facebok	4	3	1	1	5	5	3
558	Facebok	3	4	2	3	4	5	5
559	Facebok	4	7	1	2	2	6	6
560	Facebok	4	5	5	4	3	6	2
561	Facebok	5	3	2	2	6	7	2
562	Facebok	6	6	3	6	4	6	5
564	Facebok	1	7	1	7	4	7	5
565	Facebok	6	5	2	4	6	4	6
566	Facebok	5	6	2	2	6	5	2
567	Facebok	3	3	5	5	5	4	5
568	Facebok	4	4	3	5	3	5	4
569	Facebok	2	6	2	1	6	2	6
570	Facebok	6	5	1	2	6	6	5
571	Facebok	5	5	5	4	3	3	3
572	Facebok	6	6	3	5	2	6	5
573	Facebok	2	2	6	6	6	6	6
574	Facebok	4	1	7	7	5	5	3
575	Facebok	1	2	4	2	7	2	3
576	Facebok	7	2	3	2	5	6	5
577	Facebok	2	3	3	6	5	5	5
578	Facebok	3	4	5	4	5	5	5
579	Facebok	3	4	4	4	4	3	3
580	Facebok	6	3	3	1	6	5	5
581	Facebok	2	5	2	2	6	5	4
582	Facebok	2	6	6	2	2	6	1
583	Facebok	6	6	4	2	5	6	2
584	Facebok	2	6	6	2	2	6	2
585	Facebok	2	6	6	2	2	6	2
586	Facebok	4	4	4	1	6	7	7
587	Facebok	3	3	5	2	6	6	3
588	Facebok	3	5	5	5	5	5	5
589	Facebok	6	6	2	2	5	3	3
590	Facebok	3	6	3	5	3	7	3
591	Facebok	5	6	3	3	1	4	5
592	Facebok	3	6	7	7	1	7	1
593	Facebok	5	5	2	2	5	3	3
594	Facebok	3	6	2	1	6	6	2
595	Facebok	4	5	2	5	3	3	5
596	Facebok	5	5	2	2	5	3	3
597	Facebok	3	4	4	7	3	3	5
598	Facebok	7	2	1	2	6	7	6
599	Facebok	4	4	3	2	3	4	3
600	Facebok	2	5	7	3	1	7	5
601	Facebok	4	5	4	3	5	5	4
602	Facebok	3	4	5	5	5	5	3
603	Facebok	7	1	1	1	7	1	1
604	Facebok	5	5	4	6	4	5	3
605	Facebok	6	6	4	2	5	6	2
606	Facebok	5	6	5	4	4	3	2
607	Facebok	6	6	4	2	5	6	2
608	Snapchat	4	4	5	4	5	6	3
609	Snapchat	3	5	4	4	4	3	3
610	Snapchat	4	3	3	3	4	4	4
611	Snapchat	1	3	5	4	6	6	5
614	Snapchat	5	4	5	4	4	3	4
615	Snapchat	4	6	4	4	2	3	2
617	Snapchat	4	3	3	5	5	4	3
618	Snapchat	5	4	3	3	5	6	4
619	Snapchat	3	3	4	3	5	3	5
620	Snapchat	5	5	5	3	3	5	5
621	Snapchat	5	6	3	3	6	6	5
622	Snapchat	5	4	5	5	4	3	3
623	Snapchat	2	5	5	7	2	6	2
624	Snapchat	7	6	6	5	1	6	6
625	Snapchat	4	5	5	5	3	5	3
627	Snapchat	3	6	7	7	3	6	3
628	Snapchat	3	5	3	5	3	4	4
629	Snapchat	4	4	4	4	4	4	4
630	Snapchat	4	4	6	5	5	6	5
631	Snapchat	5	4	5	5	5	3	3
632	Snapchat	5	2	6	3	7	5	6
633	Snapchat	6	6	2	6	2	2	2
634	Snapchat	5	3	4	4	4	3	3
635	Snapchat	4	4	4	4	4	5	4
636	Snapchat	6	4	1	2	6	2	5
637	Snapchat	4	5	3	4	4	3	4
638	Snapchat	4	3	3	4	5	4	5
639	Snapchat	2	3	6	1	6	2	5
640	Snapchat	6	6	5	6	6	5	6
641	Snapchat	4	7	3	2	3	4	1
642	Snapchat	4	4	4	3	4	3	4
643	Snapchat	4	4	3	2	7	4	4
644	Snapchat	4	3	3	3	5	4	4
645	Snapchat	4	4	5	5	3	6	4
646	Snapchat	4	5	4	4	5	5	4
647	Snapchat	5	6	3	3	6	6	5
648	Snapchat	4	4	4	4	4	4	3
649	Snapchat	3	6	5	5	6	4	6
650	Snapchat	3	4	5	4	3	4	2
651	Snapchat	4	6	3	5	3	5	3
652	Snapchat	2	5	4	4	3	4	3
653	Snapchat	2	4	5	3	4	4	4
654	Snapchat	5	3	2	2	2	2	2
655	Snapchat	2	3	2	3	6	6	5
656	Snapchat	5	5	4	3	5	4	5
657	Snapchat	5	6	3	3	5	5	6
658	Snapchat	4	5	4	5	4	5	3
659	Snapchat	4	5	3	4	5	5	5
660	Snapchat	5	3	6	6	6	5	5
661	Snapchat	3	4	3	3	4	3	3
662	Snapchat	4	2	6	3	3	3	2
663	Snapchat	4	5	3	5	5	5	3
664	Snapchat	3	5	4	4	4	3	3
665	Snapchat	3	6	5	5	2	6	3
666	Snapchat	4	2	5	4	6	3	4
667	Snapchat	2	7	3	5	2	2	3
668	Snapchat	4	5	4	4	5	5	5
669	Snapchat	2	5	4	6	4	6	3
670	Snapchat	3	5	4	4	2	6	3
671	Snapchat	2	5	2	5	6	3	5
672	Snapchat	3	4	3	3	3	4	4
673	Snapchat	4	4	5	4	6	5	4
674	Snapchat	7	4	7	6	6	5	2
675	Snapchat	3	5	5	3	5	5	5
676	Snapchat	4	4	3	3	4	4	4
678	Snapchat	3	4	5	4	4	4	4
679	Snapchat	4	4	4	4	2	4	4
680	Snapchat	3	4	2	3	5	3	3
681	Snapchat	4	3	4	5	4	3	4
683	Snapchat	2	6	5	6	3	4	5
684	Snapchat	3	4	5	4	5	4	5
685	Snapchat	1	7	7	6	1	6	1
686	Snapchat	3	5	3	5	4	5	5
687	Snapchat	3	6	6	6	1	6	5
688	Snapchat	4	6	6	3	4	6	3
689	Snapchat	5	3	6	3	5	4	5
690	Snapchat	5	4	4	4	3	5	3
691	Snapchat	3	5	5	5	3	4	2
692	Snapchat	5	5	3	3	5	3	5
693	Snapchat	4	4	5	5	4	4	4
694	Snapchat	2	3	2	3	5	3	5
695	Snapchat	4	4	4	4	4	4	4
696	Snapchat	4	4	4	4	4	4	4
697	Snapchat	6	7	7	7	6	6	6
698	Snapchat	3	4	5	5	3	5	4
699	Snapchat	2	3	3	2	6	2	6
700	Snapchat	3	5	4	5	3	5	3
701	Snapchat	2	5	2	2	6	5	6
702	Snapchat	5	3	5	2	4	4	5
703	Snapchat	5	4	5	4	5	4	5
704	Snapchat	1	7	7	7	1	1	6
706	Snapchat	5	5	6	5	2	2	5
707	Snapchat	4	3	4	4	5	5	5
708	Snapchat	4	4	4	4	4	4	4
711	Snapchat	5	5	3	4	5	6	3
713	Snapchat	2	5	3	4	4	3	5
714	Snapchat	7	5	7	1	7	6	7
715	Snapchat	5	3	3	3	3	3	2
716	Snapchat	6	2	2	2	6	6	2
717	Snapchat	4	4	5	4	4	4	4
718	Snapchat	4	4	3	3	5	3	4
719	Snapchat	5	3	5	3	3	3	3
720	Snapchat	3	5	3	3	3	4	3
721	Snapchat	5	3	6	4	6	3	4
722	Snapchat	2	5	6	6	5	6	5
723	Snapchat	4	4	5	4	4	3	4
724	Snapchat	4	3	5	4	5	5	4
725	Snapchat	2	4	2	4	4	4	4
726	Snapchat	4	4	5	5	4	3	4
727	Snapchat	4	4	5	5	3	5	4
728	Snapchat	4	6	6	5	5	6	5
729	Snapchat	3	4	3	4	4	5	5
730	Snapchat	3	5	4	4	3	4	4
731	Snapchat	3	6	5	6	2	5	3
732	Snapchat	6	6	6	6	2	3	5
733	Snapchat	5	3	5	6	6	5	6
734	Snapchat	2	5	6	4	2	4	2
735	Snapchat	4	4	4	4	4	5	5
736	Snapchat	2	4	2	2	6	6	6
737	Snapchat	3	7	1	2	4	5	7
738	Snapchat	4	4	4	4	5	3	5
739	Snapchat	3	5	4	4	3	4	4
740	Snapchat	4	4	3	5	6	5	3
741	Snapchat	5	4	4	4	4	4	4
742	Snapchat	4	2	4	4	4	5	5
743	Snapchat	4	3	3	4	5	4	5
744	Snapchat	4	6	2	4	3	5	4
745	Snapchat	4	4	3	3	7	4	3
746	Snapchat	4	5	3	5	5	3	5
748	Snapchat	2	5	1	5	6	3	6
749	Snapchat	4	4	3	4	4	3	5
750	Snapchat	5	5	3	5	6	6	6
751	Snapchat	4	4	4	4	4	4	4
752	Snapchat	2	5	4	5	3	5	5
753	Snapchat	5	4	4	5	3	3	5
754	Snapchat	1	1	1	2	6	5	5
755	Snapchat	4	6	3	3	4	2	4
756	Snapchat	4	5	3	5	5	4	4
757	Snapchat	5	4	4	3	4	4	4
758	Snapchat	5	5	4	3	5	5	5
759	Snapchat	4	3	5	3	5	5	3
761	Snapchat	5	6	5	5	5	5	5
762	Snapchat	3	4	4	4	4	4	4
763	Snapchat	2	5	2	5	6	6	6
765	Snapchat	4	3	2	4	6	6	4
766	Snapchat	4	4	3	3	5	5	5
767	Snapchat	5	3	5	5	5	4	3
768	Snapchat	2	5	3	6	3	6	2
769	Snapchat	6	5	3	3	5	5	4
770	Snapchat	1	7	4	4	4	7	3
771	Snapchat	5	4	3	4	5	5	4
772	Snapchat	4	5	3	5	2	5	5
773	Snapchat	1	5	1	4	4	7	7
774	Snapchat	4	5	5	4	4	3	4
775	Snapchat	4	3	3	3	3	6	4
776	Snapchat	5	4	1	3	4	6	5
777	Snapchat	5	5	5	5	5	5	5
778	Snapchat	3	4	3	4	3	3	5
779	Snapchat	2	6	3	5	4	5	5
780	Snapchat	5	5	4	3	5	5	4
782	Snapchat	5	4	4	4	5	5	4
783	Snapchat	6	6	6	2	7	4	6
786	Snapchat	6	6	6	6	6	6	6
787	Snapchat	5	3	3	4	6	4	6
788	Snapchat	4	5	4	3	5	4	5
789	Snapchat	3	2	3	2	5	2	5
790	Snapchat	4	5	4	3	6	6	5
791	Snapchat	5	4	3	5	6	4	2
792	Snapchat	6	2	2	5	4	5	6
794	Snapchat	2	6	5	4	3	4	3
795	Snapchat	4	4	3	3	5	4	5
796	Snapchat	3	4	4	4	4	4	4
797	Snapchat	3	6	4	6	3	5	3
798	Pinterest	3	4	6	5	1	5	1
799	Pinterest	3	3	4	5	5	4	5
800	Pinterest	3	6	4	5	3	4	2
801	Pinterest	6	4	2	6	5	6	5
802	Pinterest	3	5	4	4	3	4	3
803	Pinterest	3	4	5	4	4	3	4
804	Pinterest	6	3	2	3	5	2	4
805	Pinterest	4	4	4	4	4	4	5
806	Pinterest	3	5	4	5	3	5	3
807	Pinterest	2	4	3	6	3	4	5
808	Pinterest	4	4	3	4	2	4	4
809	Pinterest	3	3	5	4	5	5	4
811	Pinterest	1	4	6	4	6	5	7
812	Pinterest	4	3	2	3	5	3	6
813	Pinterest	7	4	3	5	5	2	6
814	Pinterest	6	2	6	6	6	4	4
815	Pinterest	4	4	5	4	3	5	3
816	Pinterest	4	3	6	4	4	5	4
817	Pinterest	4	4	4	4	3	4	4
818	Pinterest	4	5	4	5	4	4	4
819	Pinterest	5	5	4	3	3	3	3
820	Pinterest	6	3	6	6	2	5	7
821	Pinterest	6	2	7	6	7	4	2
822	Pinterest	6	5	6	4	6	6	5
824	Pinterest	6	3	5	3	7	4	2
825	Pinterest	3	5	5	4	3	3	3
826	Pinterest	5	3	5	6	2	2	3
827	Pinterest	3	5	4	4	3	5	5
828	Pinterest	6	2	4	4	7	3	6
829	Pinterest	5	6	3	3	5	5	5
830	Pinterest	4	5	3	5	5	3	6
831	Pinterest	5	4	2	3	5	3	4
832	Pinterest	4	5	4	4	3	4	3
833	Pinterest	5	5	5	6	4	5	3
834	Pinterest	5	4	6	2	5	3	4
835	Pinterest	7	5	7	1	2	4	3
836	Pinterest	6	3	5	5	3	3	2
837	Pinterest	4	4	4	4	4	2	4
838	Pinterest	4	4	4	4	4	3	3
839	Pinterest	6	3	7	5	3	3	3
840	Pinterest	4	3	4	3	5	4	4
841	Pinterest	7	2	6	2	6	7	7
842	Pinterest	5	3	4	3	6	4	5
843	Pinterest	3	4	5	4	3	4	3
844	Pinterest	4	3	5	4	3	5	4
845	Pinterest	2	6	4	4	5	5	4
846	Pinterest	5	6	6	6	6	2	5
847	Pinterest	5	6	4	6	6	5	4
848	Pinterest	5	3	4	3	5	4	4
849	Pinterest	3	5	5	3	3	4	4
850	Pinterest	4	1	4	4	1	4	7
851	Pinterest	2	1	7	6	7	1	1
852	Pinterest	4	5	3	4	5	5	5
853	Pinterest	6	6	2	7	4	7	6
854	Pinterest	3	4	5	5	3	4	4
855	Pinterest	4	4	4	4	3	4	4
856	Pinterest	2	3	6	5	5	4	3
858	Pinterest	5	5	6	3	5	4	5
859	Pinterest	4	4	4	4	4	4	4
860	Pinterest	3	3	4	3	3	5	4
861	Pinterest	4	5	3	3	4	3	4
862	Pinterest	6	4	5	5	6	6	5
863	Pinterest	6	3	4	3	5	4	4
864	Pinterest	3	3	5	4	6	3	3
865	Pinterest	7	1	7	1	1	2	5
866	Pinterest	4	5	4	4	3	4	2
867	Pinterest	3	4	3	3	5	5	5
868	Pinterest	4	4	3	3	4	3	5
870	Pinterest	4	5	4	4	3	4	4
871	Pinterest	5	5	5	5	3	4	3
872	Pinterest	6	2	6	4	5	4	4
873	Pinterest	4	3	4	4	3	4	3
874	Pinterest	4	4	4	4	3	5	4
875	Pinterest	3	3	3	5	6	3	4
876	Pinterest	1	7	7	7	1	7	1
877	Pinterest	7	1	7	1	7	4	1
878	Pinterest	5	5	5	4	4	5	3
879	Pinterest	3	3	6	5	5	2	6
880	Pinterest	4	4	6	3	5	5	5
881	Pinterest	3	5	3	5	4	6	3
882	Pinterest	4	5	5	5	5	5	5
883	Pinterest	4	4	6	7	4	6	4
884	Pinterest	5	1	6	3	6	2	2
885	Pinterest	3	3	3	5	3	3	5
886	Pinterest	1	2	4	4	6	4	5
887	Pinterest	4	5	4	5	3	4	4
888	Pinterest	4	2	6	6	7	4	4
889	Pinterest	5	3	5	5	4	3	5
891	Pinterest	6	3	5	4	6	4	6
892	Pinterest	3	4	4	4	5	3	4
893	Pinterest	5	3	6	5	6	5	5
894	Pinterest	6	2	2	2	6	2	6
895	Pinterest	5	5	5	5	5	3	4
896	Pinterest	5	3	7	6	6	2	2
897	Pinterest	4	4	4	4	4	3	3
898	Pinterest	5	5	5	4	6	5	2
899	Pinterest	4	5	4	4	4	4	3
900	Pinterest	6	3	5	6	4	6	3
901	Pinterest	5	3	4	5	5	3	4
902	Pinterest	5	5	6	5	6	5	5
903	Pinterest	4	4	5	3	3	3	4
904	Pinterest	4	4	4	4	5	5	5
906	Pinterest	6	6	6	6	6	2	4
907	Pinterest	5	6	6	6	6	5	5
908	Pinterest	6	3	6	6	6	4	5
909	Pinterest	4	3	4	4	4	3	4
910	Pinterest	7	6	6	2	6	3	2
911	Pinterest	4	3	3	5	5	5	3
912	Pinterest	4	5	4	4	3	4	3
913	Pinterest	6	2	7	1	6	2	2
914	Pinterest	3	4	4	6	5	5	4
915	Pinterest	3	5	5	4	4	4	3
916	Pinterest	6	5	6	6	5	2	5
918	Pinterest	4	5	4	4	4	4	4
919	Pinterest	7	2	6	4	6	4	4
920	Pinterest	4	6	4	2	2	4	4
921	Pinterest	4	5	4	4	4	4	3
922	Pinterest	5	4	6	5	6	6	2
923	Pinterest	3	3	6	6	2	4	3
924	Pinterest	7	1	7	7	7	1	1
925	Pinterest	6	3	7	7	6	2	1
926	Pinterest	4	5	5	5	4	4	4
927	Pinterest	4	5	4	4	4	4	3
928	Pinterest	4	5	3	4	5	4	5
929	Pinterest	6	2	6	5	3	5	5
930	Pinterest	4	5	4	4	4	4	3
931	Pinterest	4	6	5	6	3	4	3
932	Pinterest	6	6	2	5	4	4	3
933	Pinterest	5	6	4	4	3	4	3
934	Pinterest	3	4	5	4	4	2	3
935	Pinterest	4	5	4	4	4	4	3
937	Pinterest	1	5	5	5	3	4	5
938	Pinterest	6	2	5	3	2	2	2
939	Pinterest	4	5	4	4	4	4	3
940	Pinterest	6	3	6	5	6	3	3
941	Pinterest	7	3	6	5	6	2	3
942	Pinterest	6	1	6	6	1	2	7
943	Pinterest	4	5	4	5	4	4	4
944	Pinterest	4	4	4	4	5	4	4
946	Pinterest	3	5	3	4	5	3	5
947	Pinterest	4	4	4	4	4	3	4
948	Pinterest	2	5	7	6	5	6	3
949	Pinterest	6	6	6	5	5	2	3
951	Pinterest	3	5	4	5	3	5	4
952	Pinterest	4	3	3	4	4	3	4
954	Pinterest	7	2	2	3	6	5	5
956	Pinterest	4	4	3	5	4	6	3
957	Pinterest	5	4	5	4	4	5	4
960	Pinterest	3	5	5	5	3	5	3
961	Pinterest	7	2	6	6	7	2	3
963	Pinterest	4	6	3	4	5	4	5
964	Pinterest	5	5	5	5	3	3	2
967	Pinterest	2	7	6	6	1	7	1
969	Pinterest	6	5	5	6	2	5	5
970	Pinterest	6	6	6	5	1	3	2
971	Pinterest	3	5	5	7	3	5	3
973	Pinterest	4	5	4	3	4	4	5
975	Pinterest	7	5	7	5	4	3	5
976	Pinterest	6	5	4	5	6	6	3
982	Pinterest	4	4	3	5	4	4	3
983	Pinterest	6	1	6	2	6	4	2
984	Pinterest	6	4	6	4	6	2	4
985	Pinterest	3	4	5	4	4	4	3
986	Pinterest	4	4	4	4	6	4	4
987	Pinterest	3	5	7	6	6	4	4
988	Pinterest	4	4	4	3	4	2	4
989	Pinterest	7	2	5	4	4	2	4
990	Pinterest	7	3	7	6	5	2	2
991	Pinterest	5	3	5	3	7	5	5
992	Pinterest	7	3	7	6	5	2	2
993	Pinterest	6	3	6	5	2	3	4
994	Pinterest	4	5	4	4	4	5	4
995	Pinterest	5	3	4	4	5	4	4
997	Pinterest	4	6	5	5	3	5	2
999	Pinterest	7	1	7	7	1	1	1
1000	Pinterest	7	6	7	6	7	5	7
1001	Pinterest	2	6	6	6	3	6	3
1002	Pinterest	7	1	7	7	1	1	1
1003	Pinterest	6	2	7	2	6	5	6
1004	Pinterest	4	4	7	7	1	5	4
1005	Pinterest	6	3	7	5	2	3	1
1006	Pinterest	3	5	4	4	2	3	5
1008	Pinterest	1	5	4	4	2	2	3
1009	Kakaotalk	2	6	4	3	5	2	5
1010	Kakaotalk	4	5	4	5	3	4	4
1011	Kakaotalk	4	4	4	3	4	4	4
1012	Kakaotalk	3	5	5	6	2	6	2
1013	Kakaotalk	5	4	6	4	4	6	5
1014	Kakaotalk	4	4	4	4	3	3	3
1015	Kakaotalk	2	7	2	2	6	6	2
1016	Kakaotalk	3	6	5	5	3	5	3
1017	Kakaotalk	4	3	5	2	3	5	4
1018	Kakaotalk	3	3	4	4	4	6	4
1019	Kakaotalk	2	5	6	6	2	3	4
1020	Kakaotalk	1	2	2	5	4	2	4
1021	Kakaotalk	2	6	6	6	5	6	3
1022	Kakaotalk	3	7	1	5	1	4	7
1023	Kakaotalk	4	4	5	4	4	4	5
1024	Kakaotalk	4	4	4	4	5	4	4
1025	Kakaotalk	4	3	6	5	6	7	7
1026	Kakaotalk	4	5	3	3	3	5	3
1027	Kakaotalk	5	6	6	3	5	6	5
1028	Kakaotalk	4	4	3	4	5	3	4
1029	Kakaotalk	1	7	1	3	2	2	1
1030	Kakaotalk	5	5	5	4	5	5	5
1031	Kakaotalk	4	6	6	7	2	5	3
1033	Kakaotalk	3	3	1	4	7	6	6
1034	Kakaotalk	1	5	1	1	6	7	7
1035	Kakaotalk	4	6	2	4	4	2	5
1036	Kakaotalk	2	2	2	6	2	2	6
1037	Kakaotalk	4	3	3	3	4	3	4
1038	Kakaotalk	5	3	6	3	2	6	2
1039	Kakaotalk	4	4	3	4	4	4	4
1040	Kakaotalk	3	5	4	3	3	5	4
1041	Kakaotalk	3	4	5	4	3	4	4
1042	Kakaotalk	4	4	6	4	2	4	4
1043	Kakaotalk	3	4	2	3	4	6	4
1044	Kakaotalk	1	3	4	4	3	3	2
1045	Kakaotalk	5	3	5	5	5	5	5
1046	Kakaotalk	2	4	1	2	6	4	7
1048	Kakaotalk	5	5	5	5	5	5	5
1049	Kakaotalk	4	4	3	5	5	6	4
1050	Kakaotalk	1	5	2	6	2	2	7
1051	Kakaotalk	3	3	3	5	5	3	3
1052	Kakaotalk	3	6	2	4	6	3	6
1053	Kakaotalk	1	3	1	5	7	7	7
1054	Kakaotalk	4	4	5	3	5	3	4
1055	Kakaotalk	3	5	3	3	5	6	5
1056	Kakaotalk	2	3	2	6	2	3	6
1057	Kakaotalk	5	5	3	6	6	3	5
1058	Kakaotalk	4	4	4	4	4	4	4
1059	Kakaotalk	4	4	4	4	4	4	4
1060	Kakaotalk	4	5	4	4	3	3	3
1062	Kakaotalk	3	4	5	4	4	5	4
1063	Kakaotalk	3	3	3	5	5	5	4
1064	Kakaotalk	3	5	2	4	5	3	4
1066	Kakaotalk	4	6	7	4	2	7	3
1067	Kakaotalk	4	4	4	3	6	6	4
1068	Kakaotalk	5	4	2	5	3	5	4
1069	Kakaotalk	4	3	5	3	4	3	4
1070	Kakaotalk	3	3	4	3	2	3	4
1072	Kakaotalk	1	4	1	6	7	4	6
1073	Kakaotalk	4	3	3	3	6	5	3
1074	Kakaotalk	3	5	4	4	4	4	4
1075	Kakaotalk	6	6	6	6	7	6	7
1076	Kakaotalk	6	6	6	2	6	6	2
1077	Kakaotalk	2	3	6	5	5	5	5
1078	Kakaotalk	5	4	3	4	2	4	5
1079	Kakaotalk	5	5	5	3	5	5	5
1080	Kakaotalk	4	5	4	4	4	4	4
1081	Kakaotalk	4	4	3	3	5	4	5
1082	Kakaotalk	1	7	6	7	1	1	1
1083	Kakaotalk	3	4	3	3	3	3	5
1084	Kakaotalk	4	4	3	4	5	5	4
1085	Kakaotalk	5	3	5	3	5	5	5
1086	Kakaotalk	5	4	4	3	5	3	4
1087	Kakaotalk	2	6	3	5	3	7	6
1088	Kakaotalk	4	5	3	4	5	5	5
1089	Kakaotalk	4	4	5	3	5	3	5
1090	Kakaotalk	6	3	5	7	2	3	3
1091	Kakaotalk	5	5	5	5	5	5	5
1092	Kakaotalk	3	6	3	3	6	6	5
1093	Kakaotalk	5	3	2	4	5	7	5
1094	Kakaotalk	3	6	2	4	6	6	3
1096	Kakaotalk	3	4	3	4	4	6	4
1097	Kakaotalk	6	3	2	3	6	6	7
1098	Kakaotalk	6	3	6	2	3	6	4
1099	Kakaotalk	3	6	3	4	5	6	2
1100	Kakaotalk	4	4	4	5	4	5	5
1101	Kakaotalk	2	6	6	5	4	6	5
1102	Kakaotalk	5	5	2	3	5	5	3
1103	Kakaotalk	2	5	2	4	6	6	6
1104	Kakaotalk	3	5	2	5	3	5	3
1105	Kakaotalk	2	4	2	4	5	6	5
1106	Kakaotalk	1	7	1	1	7	5	7
1107	Kakaotalk	3	4	7	3	6	5	4
1108	Kakaotalk	3	5	4	5	4	4	4
1109	Kakaotalk	5	6	3	3	2	6	5
1111	Kakaotalk	4	4	2	4	4	6	6
1112	Kakaotalk	6	5	5	5	6	5	6
1113	Kakaotalk	2	5	2	5	5	5	6
1114	Kakaotalk	6	4	6	2	5	6	6
1115	Kakaotalk	5	6	3	6	3	5	3
1116	Kakaotalk	5	6	3	3	5	5	5
1117	Kakaotalk	4	4	5	4	4	5	4
1118	Kakaotalk	3	5	2	4	5	3	5
1120	Kakaotalk	3	5	3	4	4	3	5
1121	Kakaotalk	5	5	4	3	5	3	4
1122	Kakaotalk	4	4	5	5	5	3	4
1123	Kakaotalk	4	4	2	4	3	4	5
1124	Kakaotalk	1	7	3	2	4	3	7
1126	Kakaotalk	3	6	3	5	3	4	3
1127	Kakaotalk	6	6	1	2	6	2	6
1129	Kakaotalk	5	3	4	3	5	3	5
1130	Kakaotalk	4	4	4	4	4	4	4
1131	Kakaotalk	2	3	1	5	6	6	6
1132	Kakaotalk	5	5	6	4	3	4	3
1134	Kakaotalk	3	4	3	4	5	5	3
1135	Kakaotalk	2	6	1	4	7	6	7
1137	Kakaotalk	3	5	3	4	6	5	2
1138	Kakaotalk	1	6	4	5	6	7	6
1139	Kakaotalk	2	6	3	5	5	5	5
1140	Kakaotalk	4	4	7	4	1	4	4
1141	Kakaotalk	4	3	3	3	5	3	5
1142	Kakaotalk	4	5	4	4	4	4	4
1143	Kakaotalk	3	6	1	3	2	4	6
1144	Kakaotalk	2	6	2	2	5	6	6
1145	Kakaotalk	4	4	3	3	4	3	4
1146	Kakaotalk	3	4	4	4	4	5	4
1147	Kakaotalk	4	4	4	3	5	3	4
1148	Kakaotalk	4	5	4	4	4	3	4
1149	Kakaotalk	5	4	2	4	5	5	5
1150	Kakaotalk	2	3	2	5	4	4	2
1151	Kakaotalk	2	6	6	5	3	7	2
1152	Kakaotalk	4	4	3	3	4	3	4
1153	Kakaotalk	2	3	5	5	4	5	3
1154	Kakaotalk	4	5	5	5	3	6	5
1155	Kakaotalk	4	5	5	4	3	4	4
1156	Kakaotalk	3	6	2	1	4	4	6
1158	Kakaotalk	4	4	4	4	4	4	4
1159	Kakaotalk	3	3	3	5	2	6	6
1160	Kakaotalk	4	4	1	4	1	4	4
1161	Kakaotalk	4	4	5	5	3	4	4
1162	Kakaotalk	4	3	3	3	6	4	5
1163	Kakaotalk	4	5	2	3	4	5	5
1164	Kakaotalk	3	5	4	6	4	5	3
1165	Kakaotalk	1	7	1	2	5	3	7
1166	Kakaotalk	3	5	4	5	4	4	4
1167	Kakaotalk	2	6	1	4	4	5	5
1168	Kakaotalk	4	4	4	4	4	4	3
1169	Kakaotalk	3	5	2	4	5	5	4
1170	Kakaotalk	6	7	2	7	1	7	7
1171	Kakaotalk	4	4	4	4	4	4	4
1173	Kakaotalk	4	4	2	4	4	5	5
1174	Kakaotalk	1	7	1	3	5	6	6
1175	Kakaotalk	4	5	1	2	2	1	7
1176	Kakaotalk	3	5	5	5	4	5	3
1177	Kakaotalk	5	3	5	4	5	4	5
1178	Kakaotalk	5	5	6	5	3	6	3
1179	Kakaotalk	1	7	5	6	5	6	2
1180	Kakaotalk	3	4	4	6	3	4	4
1182	Kakaotalk	6	6	6	4	5	5	4
1183	Kakaotalk	4	4	4	3	4	5	5
1185	Kakaotalk	3	5	5	5	4	7	6
1186	Kakaotalk	4	3	3	4	4	4	2
1187	Kakaotalk	3	6	5	5	3	5	4
1188	Kakaotalk	7	1	7	7	7	7	7
1189	Kakaotalk	4	4	4	4	4	4	4
1190	Yahoo answers	3	5	4	7	3	6	4
1192	Yahoo answers	4	4	5	4	3	4	4
1193	Yahoo answers	7	3	7	2	1	6	6
1195	Yahoo answers	2	4	4	3	5	4	4
1196	Yahoo answers	7	1	7	3	6	2	2
1197	Yahoo answers	6	4	4	2	4	4	4
1198	Yahoo answers	6	6	6	6	6	6	2
1199	Yahoo answers	3	6	4	4	4	7	4
1201	Yahoo answers	3	3	4	5	5	6	1
1203	Yahoo answers	6	2	6	5	4	6	2
1204	Yahoo answers	4	5	6	4	4	4	2
1207	Yahoo answers	7	2	7	7	2	3	3
1210	Yahoo answers	6	4	7	7	6	7	7
1212	Yahoo answers	7	3	7	5	3	6	4
1213	Yahoo answers	2	3	4	3	5	5	5
1214	Yahoo answers	5	4	3	5	5	5	5
1215	Yahoo answers	7	1	7	4	5	5	4
1216	Yahoo answers	4	6	5	5	4	4	4
1217	Yahoo answers	6	4	3	5	3	3	5
1218	Yahoo answers	2	4	4	4	5	4	4
1219	Yahoo answers	4	4	6	5	5	5	5
1220	Yahoo answers	7	2	7	6	2	7	1
1221	Yahoo answers	5	5	5	4	5	6	3
1222	Yahoo answers	6	2	6	6	2	3	2
1223	Yahoo answers	5	1	7	6	5	3	2
1224	Yahoo answers	6	3	7	5	5	7	2
1226	Yahoo answers	2	2	5	5	3	3	2
1227	Yahoo answers	5	3	5	3	4	4	3
1228	Yahoo answers	7	6	6	6	6	4	2
1229	Yahoo answers	6	2	7	6	5	5	5
1231	Yahoo answers	7	2	7	6	6	2	2
1232	Yahoo answers	7	1	6	4	4	4	4
1233	Yahoo answers	5	4	4	5	4	5	4
1234	Yahoo answers	5	4	5	5	4	3	3
1236	Yahoo answers	6	2	7	4	4	4	5
1237	Yahoo answers	6	3	6	4	4	3	4
1238	Yahoo answers	6	2	6	6	5	5	2
1239	Yahoo answers	6	2	6	6	2	5	1
1240	Yahoo answers	5	3	6	5	3	3	4
1241	Yahoo answers	7	1	7	7	3	2	2
1242	Yahoo answers	7	2	7	6	2	6	2
1243	Yahoo answers	7	1	7	7	7	4	3
1244	Yahoo answers	7	3	7	6	5	7	3
1246	Yahoo answers	7	6	6	5	3	4	4
1247	Yahoo answers	7	1	7	7	1	7	1
1248	Yahoo answers	4	4	7	5	3	7	4
1249	Yahoo answers	7	1	7	7	1	1	1
1250	Yahoo answers	2	5	6	5	3	6	3
1252	Yahoo answers	6	3	7	4	7	7	6
1253	Yahoo answers	7	1	7	4	1	4	4
1254	Yahoo answers	4	4	5	4	4	5	3
1255	Yahoo answers	4	4	5	4	2	3	4
1256	Yahoo answers	6	3	5	6	6	5	4
1257	Yahoo answers	7	1	6	6	6	3	2
1258	Yahoo answers	6	4	6	6	3	4	4
1259	Yahoo answers	5	5	4	6	2	2	4
1261	Yahoo answers	5	4	6	5	4	6	3
1262	Yahoo answers	7	1	7	4	7	4	3
1263	Yahoo answers	6	2	6	2	6	6	2
1264	Yahoo answers	5	5	6	6	4	4	3
1266	Yahoo answers	7	4	7	3	4	2	2
1267	Yahoo answers	6	3	6	5	6	3	5
1268	Yahoo answers	5	5	5	5	5	6	5
1269	Yahoo answers	6	3	2	2	5	4	4
1270	Yahoo answers	7	2	7	5	3	5	3
1271	Yahoo answers	7	2	4	6	2	2	2
1272	Yahoo answers	6	1	7	5	6	6	3
1273	Yahoo answers	7	2	7	6	3	5	2
1274	Yahoo answers	7	3	7	1	2	4	3
1275	Yahoo answers	6	2	7	6	3	6	3
1276	Yahoo answers	6	6	6	6	6	5	5
1277	Yahoo answers	6	2	7	4	4	4	3
1278	Yahoo answers	7	1	7	7	1	4	1
1279	Yahoo answers	7	1	7	7	6	6	2
1281	Yahoo answers	6	3	6	6	2	2	2
1282	Yahoo answers	7	3	7	7	6	6	5
1283	Yahoo answers	2	6	2	2	3	3	2
1285	Yahoo answers	7	4	5	3	6	6	5
1286	Yahoo answers	7	2	7	6	7	7	1
1287	Yahoo answers	6	2	6	5	2	2	2
1288	Yahoo answers	6	2	5	2	6	4	2
1289	Yahoo answers	7	1	7	6	6	2	1
1290	Yahoo answers	7	2	7	4	3	4	4
1291	Yahoo answers	7	1	7	4	1	1	1
1292	Yahoo answers	6	2	6	6	2	6	2
1293	Yahoo answers	5	3	5	5	5	3	3
1294	Yahoo answers	7	2	7	6	6	3	3
1295	Yahoo answers	7	1	7	7	2	5	2
1296	Yahoo answers	6	2	6	6	6	4	6
1299	Yahoo answers	7	4	7	7	3	4	4
1300	Yahoo answers	4	4	4	5	4	4	4
1301	Yahoo answers	7	3	7	6	2	7	6
1302	Yahoo answers	7	5	7	7	1	4	1
1303	Yahoo answers	6	3	6	6	1	1	4
1304	Yahoo answers	4	6	4	7	3	4	3
1306	Yahoo answers	6	2	7	6	4	4	4
1307	Yahoo answers	6	3	6	3	6	5	5
1308	Yahoo answers	6	5	7	6	2	4	3
1309	Yahoo answers	7	4	7	7	1	4	1
1310	Yahoo answers	5	5	7	7	7	6	2
1311	Yahoo answers	6	2	7	5	4	5	2
1312	Yahoo answers	4	4	4	5	5	4	3
1313	Yahoo answers	3	6	5	5	4	6	3
1314	Yahoo answers	6	6	7	7	2	1	2
1315	Yahoo answers	7	2	7	7	1	6	2
1317	Yahoo answers	6	2	6	7	3	3	3
1318	Yahoo answers	2	4	4	6	2	4	4
1319	Yahoo answers	5	3	6	2	6	5	4
1320	Yahoo answers	7	1	7	7	4	7	1
1321	Yahoo answers	7	2	7	7	1	6	2
1322	Yahoo answers	7	1	7	7	7	7	1
1323	Yahoo answers	7	6	7	7	6	3	3
1324	Yahoo answers	5	4	5	4	4	4	4
1325	Yahoo answers	6	2	7	6	4	5	3
1326	Yahoo answers	2	2	6	5	6	5	6
1327	Yahoo answers	7	2	7	6	5	4	3
1328	Yahoo answers	5	3	4	4	5	4	4
1329	Yahoo answers	5	3	6	5	2	2	2
1330	Yahoo answers	7	1	7	7	5	4	5
1331	Yahoo answers	5	5	5	3	3	5	5
1332	Yahoo answers	6	2	7	6	7	2	3
1334	Yahoo answers	4	4	5	4	4	3	3
1337	Yahoo answers	6	2	6	2	1	4	2
1338	Yahoo answers	7	3	7	7	4	5	3
1340	Yahoo answers	6	2	6	4	6	6	6
1342	Yahoo answers	3	4	6	5	4	4	4
1344	Yahoo answers	7	1	7	7	7	5	1
1345	Yahoo answers	7	2	7	7	7	6	1
1346	Yahoo answers	6	2	7	6	3	6	2
1347	Yahoo answers	7	1	7	7	4	7	4
1348	Yahoo answers	6	6	7	5	3	6	4
1349	Yahoo answers	6	5	5	5	5	4	4
1350	Yahoo answers	6	2	6	5	2	4	5
1353	Yahoo answers	7	3	7	7	4	7	6
1354	Yahoo answers	7	3	6	6	6	2	2
1355	Yahoo answers	7	4	6	6	6	4	2
1356	Yahoo answers	7	2	6	5	6	6	2
1357	Yahoo answers	7	2	6	5	7	5	1
1360	Yahoo answers	6	2	7	6	4	4	3
1361	Yahoo answers	6	2	7	7	7	1	1
1362	Yahoo answers	6	5	6	5	3	2	2
1364	Yahoo answers	6	4	5	3	6	6	5
1365	Yahoo answers	7	1	7	6	1	7	1
1366	Yahoo answers	7	3	7	5	5	6	3
1367	Yahoo answers	7	1	7	7	6	5	4
1368	Yahoo answers	7	4	7	7	7	6	2
1370	Yahoo answers	7	5	7	7	5	2	2
1371	Yahoo answers	7	1	7	7	2	7	2
1372	Yahoo answers	3	4	5	4	3	4	3
1374	Yahoo answers	6	2	6	6	1	2	2
1375	Yahoo answers	6	2	7	7	7	5	6
1376	Yahoo answers	7	1	7	7	6	7	1
1377	Yahoo answers	6	2	7	2	6	2	2
1378	Yahoo answers	6	3	7	7	6	6	6
1379	Yahoo answers	6	3	5	5	3	5	3
1380	Yahoo answers	5	3	6	5	3	6	3
1381	Yahoo answers	7	1	7	5	1	4	2
1382	Yahoo answers	3	3	4	5	3	5	3
1383	Yahoo answers	7	1	7	5	4	5	2
1386	Yahoo answers	5	3	4	3	4	3	4
1387	Yahoo answers	3	3	6	6	5	3	2
1389	Yahoo answers	5	5	6	5	3	6	5
1390	Yahoo answers	5	3	6	6	6	5	3
1391	Yahoo answers	6	6	6	5	2	6	5
1392	Yahoo answers	7	1	7	6	5	2	2
1393	Yahoo answers	7	2	6	7	6	7	2
1394	Yahoo answers	6	4	6	6	3	6	4
1397	Yahoo answers	6	7	7	7	2	7	6
1398	Yahoo answers	7	1	6	5	6	2	2
1399	Yahoo answers	6	1	7	4	2	4	4
1401	Yahoo answers	7	3	6	6	4	6	4
1402	Yahoo answers	7	2	7	6	7	5	2
1403	Yahoo answers	6	3	6	4	6	5	5
1405	Yahoo answers	5	4	7	7	3	2	1
1407	Yahoo answers	6	3	6	6	4	2	2
1408	Yahoo answers	7	3	7	7	3	2	3
1409	Yahoo answers	7	4	7	7	1	7	3
1410	Yahoo answers	7	1	7	7	7	4	4
1412	Yahoo answers	6	2	7	3	5	5	3
1413	Yahoo answers	7	1	7	7	6	7	1
1414	Yahoo answers	6	3	5	3	3	4	3
1415	Yahoo answers	5	3	4	4	4	4	4
1416	Yahoo answers	6	2	7	7	5	3	3
1417	Yahoo answers	6	5	5	5	5	3	5
1418	Yahoo answers	5	6	6	6	3	5	4
1419	Yahoo answers	6	2	7	7	6	6	5
1420	Yahoo answers	7	1	7	7	7	7	7
1421	Yahoo answers	7	2	7	7	1	2	1
1422	Yahoo answers	7	3	6	7	2	4	3
1423	Instagram	5	4	3	4	4	4	5
1424	Instagram	3	7	4	7	3	7	3
1425	Instagram	3	5	3	2	3	4	4
1426	Instagram	5	3	6	3	6	5	2
1427	Instagram	4	3	6	2	7	5	5
1428	Instagram	4	5	4	3	5	5	5
1429	Instagram	5	3	2	5	1	6	2
1430	Instagram	4	4	3	3	5	3	5
1431	Instagram	4	4	4	4	5	6	5
1432	Instagram	6	3	6	5	1	5	4
1433	Instagram	5	5	5	5	5	5	4
1434	Instagram	5	6	4	4	6	5	6
1435	Instagram	2	7	6	2	3	7	4
1436	Instagram	7	6	6	2	7	7	7
1437	Instagram	5	1	5	3	7	6	3
1438	Instagram	3	4	5	4	3	4	4
1439	Instagram	7	6	6	5	6	5	6
1440	Instagram	5	3	3	3	5	3	5
1441	Instagram	6	2	2	2	6	5	7
1442	Instagram	7	5	2	5	7	6	4
1443	Instagram	3	5	3	4	5	4	5
1444	Instagram	4	6	3	4	5	6	5
1445	Instagram	1	1	7	1	7	7	1
1446	Instagram	4	5	3	6	1	3	6
1447	Instagram	6	5	4	3	6	4	5
1448	Instagram	5	4	5	4	5	3	4
1449	Instagram	4	4	5	3	4	4	4
1450	Instagram	4	4	4	3	3	4	4
1451	Instagram	4	4	5	3	3	4	4
1452	Instagram	6	2	2	2	5	6	5
1453	Instagram	5	6	4	3	5	2	4
1454	Instagram	5	5	4	4	7	6	6
1455	Instagram	4	3	4	3	5	3	4
1456	Instagram	5	4	5	5	4	5	4
1457	Instagram	5	6	5	6	6	5	5
1458	Instagram	3	2	6	4	6	6	2
1459	Instagram	4	4	6	4	5	4	4
1460	Instagram	5	6	2	3	2	2	3
1461	Instagram	5	5	5	2	6	4	5
1462	Instagram	4	3	4	3	2	3	5
1463	Instagram	6	3	5	6	5	5	3
1464	Instagram	2	6	6	3	6	6	3
1465	Instagram	6	5	5	4	6	6	4
1466	Instagram	5	3	5	5	4	5	5
1467	Instagram	2	2	6	6	2	6	2
1468	Instagram	6	5	3	2	7	6	4
1469	Instagram	6	3	5	4	5	5	5
1470	Instagram	5	4	5	3	7	5	2
1471	Instagram	7	7	7	6	1	7	7
1472	Instagram	3	5	6	6	3	5	3
1473	Instagram	6	3	5	5	5	3	3
1474	Instagram	4	5	3	5	6	5	5
1475	Instagram	2	3	5	5	3	5	3
1476	Instagram	5	5	5	5	6	6	5
1477	Instagram	6	3	5	3	5	4	6
1478	Instagram	4	4	6	3	7	5	4
1479	Instagram	3	4	3	6	2	4	2
1480	Instagram	7	3	7	1	7	6	7
1481	Instagram	7	3	3	3	3	6	5
1482	Instagram	2	6	6	7	2	7	2
1483	Instagram	6	3	2	2	6	5	5
1484	Instagram	6	6	4	5	4	5	5
1485	Instagram	6	2	6	2	6	5	4
1486	Instagram	6	4	3	3	5	5	4
1487	Instagram	6	4	5	3	6	3	5
1488	Instagram	5	5	3	4	5	6	5
1489	Instagram	4	4	4	4	4	4	4
1490	Instagram	5	6	4	4	6	5	4
1491	Instagram	7	7	4	4	7	7	1
1492	Instagram	6	2	4	2	7	6	3
1493	Instagram	4	5	2	2	5	5	5
1494	Instagram	5	5	5	5	5	5	3
1495	Instagram	7	2	7	7	7	3	7
1496	Instagram	5	6	6	3	6	6	6
1497	Instagram	6	2	4	5	6	6	7
1498	Instagram	3	6	2	2	3	2	3
1499	Instagram	5	3	6	6	5	6	5
1500	Instagram	3	5	4	5	3	5	3
1501	Instagram	4	1	1	2	7	7	7
1502	Instagram	1	7	7	6	1	6	1
1503	Instagram	6	5	5	3	6	5	5
1504	Instagram	6	2	6	4	5	2	3
1505	Instagram	2	7	6	2	7	7	7
1506	Instagram	6	4	5	4	5	6	7
1507	Instagram	6	6	6	3	3	2	6
1508	Instagram	7	2	6	2	5	3	2
1509	Instagram	6	6	2	5	6	2	6
1510	Instagram	5	4	5	3	5	5	4
1511	Instagram	6	3	7	2	7	5	7
1512	Instagram	5	4	5	3	2	5	5
1513	Instagram	4	4	3	2	6	3	6
1514	Instagram	6	5	3	2	1	4	5
1515	Instagram	4	5	3	4	5	5	4
1516	Instagram	3	6	4	5	5	5	3
1517	Instagram	6	3	5	2	6	7	5
1518	Instagram	5	2	5	2	7	3	4
1519	Instagram	4	3	3	4	5	4	5
1520	Instagram	6	6	4	4	5	3	3
1521	Instagram	1	7	7	7	1	6	1
1522	Instagram	5	3	5	4	6	5	3
1523	Instagram	5	6	3	3	6	5	5
1524	Instagram	3	3	6	3	4	5	5
1525	Instagram	5	5	6	3	5	6	5
1526	Instagram	1	6	5	3	6	7	4
1527	Instagram	3	3	2	7	2	5	5
1528	Instagram	6	6	4	5	4	5	6
1529	Instagram	4	5	3	4	3	4	4
1530	Instagram	3	5	5	6	3	6	2
1531	Instagram	6	6	5	4	5	4	5
1532	Instagram	4	4	4	5	3	4	4
1533	Instagram	6	2	6	6	1	3	6
1534	Instagram	4	4	3	4	4	4	4
1535	Instagram	4	4	6	5	2	3	4
1536	Instagram	5	3	4	4	5	5	4
1537	Instagram	5	4	5	5	4	5	4
1538	Instagram	2	6	6	2	3	6	5
1539	Instagram	5	4	7	6	4	4	5
1540	Instagram	2	5	6	4	4	4	4
1541	Instagram	5	7	5	2	7	5	5
1542	Instagram	4	5	4	4	4	4	3
1543	Instagram	5	5	6	2	6	5	5
1544	Instagram	6	6	6	2	6	7	3
1545	Instagram	6	7	5	7	6	5	6
1546	Instagram	4	4	5	4	6	5	4
1547	Instagram	6	5	6	4	6	4	6
1548	Instagram	5	4	5	5	3	5	4
1549	Instagram	5	5	4	3	5	5	5
1550	Instagram	5	4	4	4	4	4	4
1551	Instagram	5	6	5	3	5	6	3
1552	Instagram	5	6	5	5	6	6	6
1553	Instagram	2	3	4	3	6	6	4
1554	Instagram	4	5	4	4	3	4	4
1555	Instagram	5	6	5	5	6	6	4
1556	Instagram	7	4	4	7	7	7	7
1557	Instagram	4	4	4	5	4	4	4
1558	Instagram	2	5	6	4	2	5	3
1559	Instagram	2	6	2	2	6	6	3
1560	Instagram	3	6	3	3	4	5	3
1561	Instagram	5	2	7	5	4	4	2
1562	Instagram	6	6	6	5	6	3	5
1563	Instagram	3	4	4	5	4	4	4
1564	Instagram	4	3	3	4	3	3	3
1565	Instagram	5	4	5	3	5	2	3
1566	Instagram	5	5	3	3	5	5	4
1567	Instagram	6	5	3	5	7	4	3
1568	Instagram	5	6	5	2	6	3	5
1569	Instagram	7	1	1	1	7	1	7
1570	Instagram	4	3	3	4	5	5	5
1571	Instagram	6	2	5	5	6	5	3
1572	Instagram	4	6	5	6	5	4	5
1573	Instagram	2	6	4	4	4	5	4
1574	Instagram	7	2	7	6	6	5	2
1575	Instagram	6	5	4	2	7	6	7
1576	Instagram	6	5	6	5	3	5	4
1577	Instagram	7	6	4	4	7	4	7
1578	Instagram	3	6	6	2	7	6	7
1579	Instagram	5	3	3	6	4	2	5
1580	Instagram	5	5	5	3	3	5	3
1581	Instagram	5	3	5	4	5	4	5
1582	Instagram	5	4	3	4	5	4	5
1583	Instagram	6	7	7	6	6	3	3
1584	Instagram	6	2	2	4	6	2	6
1585	Instagram	5	5	3	3	5	4	5
1586	Instagram	6	6	4	3	6	5	5
1587	Instagram	1	2	1	4	4	6	4
1588	Instagram	6	2	6	2	7	3	6
1589	Instagram	6	4	3	6	2	4	5
1590	Instagram	5	4	5	5	5	4	4
1591	Instagram	6	4	4	6	1	5	5
1592	Instagram	5	5	3	3	5	3	5
1593	Instagram	6	6	6	3	5	5	5
1594	Instagram	1	5	2	4	4	4	4
1595	Instagram	4	4	4	4	4	5	4
1596	Instagram	6	5	5	3	7	6	6
1597	Instagram	4	4	4	4	4	3	4
1598	Instagram	3	2	3	2	5	7	4
1599	Instagram	6	5	2	2	6	5	6
1600	Instagram	6	2	7	3	7	5	6
1601	Instagram	5	6	5	2	6	4	4
1602	Instagram	6	4	5	3	5	5	3
1603	Instagram	6	5	6	1	2	5	6
1604	Instagram	6	7	7	7	7	6	7
1605	Instagram	6	2	5	2	6	4	3
1606	Instagram	5	3	4	2	6	6	5
1607	Instagram	6	3	7	5	2	5	3
1608	Instagram	3	5	4	2	4	5	2
1609	Instagram	3	6	2	6	7	6	7
1610	Instagram	7	4	4	2	6	4	5
1611	Instagram	3	5	4	3	4	3	5
1612	Instagram	6	2	6	6	6	3	2
1613	Instagram	2	5	5	5	4	4	3
1614	Instagram	6	7	4	3	6	5	4
1615	LINE	3	4	6	3	2	4	2
1616	LINE	5	5	2	3	6	6	5
1617	LINE	3	5	5	4	4	6	3
1618	LINE	7	1	2	2	6	3	5
1619	LINE	4	3	6	6	5	7	5
1620	LINE	3	5	4	4	4	4	4
1621	LINE	2	5	2	6	6	6	6
1622	LINE	2	7	6	7	3	6	2
1623	LINE	1	6	3	2	2	3	6
1624	LINE	1	5	5	5	2	5	3
1625	LINE	2	7	2	6	6	6	6
1626	LINE	1	6	1	1	4	5	7
1627	LINE	4	4	1	3	1	1	4
1628	LINE	1	4	1	4	7	7	7
1629	LINE	5	7	2	3	1	2	6
1630	LINE	3	5	5	5	3	4	4
1631	LINE	4	5	4	5	3	5	3
1632	LINE	3	6	5	6	2	5	2
1633	LINE	1	7	1	1	6	7	6
1634	LINE	3	4	5	4	2	5	3
1635	LINE	5	6	5	4	1	2	7
1636	LINE	7	6	3	4	5	5	4
1637	LINE	3	2	2	3	4	5	7
1638	LINE	3	4	4	4	3	4	4
1639	LINE	4	5	3	4	4	6	5
1640	LINE	5	4	6	7	7	7	7
1641	LINE	5	5	3	4	4	4	5
1642	LINE	1	4	1	2	2	4	6
1643	LINE	4	5	5	4	4	4	4
1644	LINE	2	6	2	2	2	2	6
1645	LINE	5	5	2	2	5	6	6
1646	LINE	5	5	2	3	6	6	6
1647	LINE	7	7	2	3	4	5	4
1648	LINE	1	6	1	5	3	6	6
1649	LINE	1	7	1	2	5	6	6
1650	LINE	2	5	2	3	5	6	4
1651	LINE	6	5	6	5	5	4	5
1652	LINE	1	7	1	2	6	7	7
1653	LINE	7	6	1	2	3	6	7
1654	LINE	3	3	3	3	3	4	5
1655	LINE	3	5	3	4	5	5	5
1656	LINE	3	3	3	4	5	7	4
1657	LINE	2	6	1	2	3	2	3
1658	LINE	6	5	1	1	5	6	6
1659	LINE	3	4	2	4	4	6	5
1660	LINE	2	5	2	4	5	5	5
1661	LINE	6	4	1	7	5	7	6
1662	LINE	5	4	1	1	1	3	4
1663	LINE	4	3	1	5	1	6	4
1664	LINE	6	3	1	1	6	6	2
1665	LINE	2	6	1	2	2	7	4
1666	LINE	3	5	3	4	4	6	3
1667	LINE	5	5	3	5	5	5	5
1668	LINE	6	4	5	5	5	2	3
1669	LINE	3	5	1	4	6	7	4
1670	LINE	3	4	4	4	4	4	4
1671	LINE	1	7	1	4	1	7	6
1672	LINE	2	5	1	3	5	2	2
1673	LINE	3	4	4	3	4	4	4
1674	LINE	2	3	1	5	6	6	6
1675	LINE	3	6	2	2	3	5	6
1676	LINE	3	5	2	3	3	3	5
1677	LINE	2	5	4	5	5	6	4
1678	LINE	1	7	1	1	1	1	7
1679	LINE	6	5	3	4	2	3	4
1680	LINE	2	5	2	2	4	6	6
1681	LINE	4	5	2	3	5	5	5
1682	LINE	2	6	1	6	2	2	1
1683	LINE	3	5	1	1	1	3	2
1684	LINE	5	6	2	4	3	2	6
1685	LINE	4	3	3	1	1	1	3
1686	LINE	4	5	3	5	4	5	4
1687	LINE	4	4	1	4	4	7	7
1688	LINE	4	4	4	4	5	3	3
1689	LINE	7	6	1	3	4	1	5
1690	LINE	2	4	6	4	4	3	2
1691	LINE	2	6	2	3	3	7	7
1692	LINE	2	6	2	6	6	6	6
1693	LINE	1	7	2	2	2	2	6
1694	LINE	5	5	1	1	5	7	4
1695	LINE	4	4	2	3	5	4	3
1696	LINE	6	2	2	7	5	3	5
1697	LINE	5	6	2	3	2	3	5
1698	LINE	4	5	3	3	5	5	6
1699	LINE	3	4	3	3	4	4	5
1700	LINE	1	6	1	3	6	6	6
1701	LINE	3	5	5	4	4	4	4
1702	LINE	1	6	2	7	5	3	6
1703	LINE	6	6	2	3	6	5	6
1704	LINE	4	3	3	4	5	3	5
1705	LINE	4	6	5	6	3	5	3
1706	LINE	3	3	1	5	4	3	4
1707	LINE	4	5	2	2	4	4	6
1708	LINE	3	5	3	4	2	6	5
1709	LINE	4	4	4	4	4	4	5
1710	LINE	3	6	1	2	2	3	6
1711	LINE	4	4	4	4	5	5	5
1712	LINE	4	4	1	3	7	1	4
1713	LINE	6	5	2	2	6	5	4
1714	LINE	2	6	2	3	5	5	6
1715	LINE	5	6	3	3	3	5	5
1716	LINE	4	5	1	2	6	6	6
1717	LINE	3	6	3	3	5	6	6
1718	LINE	2	5	1	2	6	5	6
1719	LINE	2	5	2	3	5	6	6
1720	LINE	1	7	1	6	7	6	7
1721	LINE	5	5	3	3	2	2	3
1722	LINE	5	7	1	7	1	6	7
1723	LINE	4	6	3	3	6	6	7
1724	LINE	2	7	2	2	4	4	5
1725	LINE	2	6	2	2	6	6	7
1726	LINE	3	5	3	5	3	5	5
1727	LINE	4	3	4	4	5	4	7
1728	LINE	4	4	4	4	5	5	5
1729	LINE	1	3	1	2	4	4	5
1730	LINE	2	6	3	5	5	7	6
1731	LINE	1	6	2	4	6	4	5
1732	LINE	1	7	1	4	1	2	7
1733	LINE	2	6	2	4	1	4	6
1734	LINE	2	5	1	1	7	1	5
1735	LINE	2	2	1	2	1	4	6
1736	LINE	3	6	1	5	3	7	6
1737	LINE	3	4	1	2	4	7	6
1738	LINE	2	5	4	5	2	5	3
1739	LINE	4	5	5	5	4	5	3
1740	LINE	2	6	1	5	2	3	6
1741	LINE	7	7	1	4	1	4	6
1742	LINE	1	6	2	4	1	1	4
1743	LINE	3	4	4	3	5	6	3
1744	LINE	2	5	3	2	5	6	4
1745	LINE	3	3	3	6	5	2	4
1746	LINE	1	5	4	2	5	4	4
1747	LINE	3	5	4	5	2	5	2
1748	LINE	1	7	1	2	4	3	6
1749	LINE	2	5	3	3	2	6	6
1750	LINE	6	7	2	6	1	2	6
1751	LINE	1	7	1	3	1	7	5
1752	LINE	3	6	2	3	3	6	6
1753	LINE	4	5	2	5	3	6	6
1754	LINE	7	4	1	4	4	7	4
1755	LINE	5	4	2	2	5	5	3
1756	LINE	5	4	3	4	3	4	4
1757	LINE	2	6	2	3	6	6	6
1758	LINE	2	6	4	3	3	6	4
1759	LINE	3	4	3	5	4	3	3
1760	LINE	5	6	2	4	3	3	7
1761	LINE	3	5	2	4	6	6	5
1762	LINE	2	2	1	3	5	3	6
1763	LINE	2	6	2	6	1	4	6
1764	LINE	2	7	1	2	3	7	7
1765	LINE	5	3	5	5	3	3	3
1766	LINE	4	5	2	4	4	4	5
1767	LINE	4	5	2	6	2	5	2
1768	LINE	1	7	1	1	1	4	6
1769	LINE	2	7	2	5	1	3	6
1770	LINE	4	6	3	4	4	5	6
1771	LINE	3	4	3	5	3	1	3
1772	LINE	2	5	1	4	3	4	5
1773	LINE	5	4	1	3	3	5	5
1774	LINE	1	3	1	4	6	6	4
1775	LINE	1	6	1	5	2	4	6
1776	LINE	5	5	2	2	5	5	6
1777	LINE	7	7	1	3	1	6	6
1778	LINE	3	5	1	3	6	5	5
1779	LINE	1	6	1	1	7	7	6
1780	LINE	4	6	2	4	5	5	5
1781	LINE	5	6	1	2	1	5	6
1782	LINE	1	6	2	5	4	3	3
1783	LINE	4	4	3	4	4	4	5
1784	LINE	2	4	2	3	3	5	3
1785	LINE	5	6	1	4	6	7	7
1786	LINE	7	6	1	4	3	3	5
1787	LINE	4	4	4	4	4	4	4
1788	LINE	1	7	1	7	6	7	5
1789	LINE	5	5	3	3	5	5	5
1790	LINE	1	7	1	1	7	7	7
1791	LINE	3	4	2	2	6	6	6
1792	LINE	5	6	2	3	6	3	6
1793	LINE	2	3	1	2	3	3	3
1794	LINE	4	6	3	4	2	3	5
1795	LINE	3	5	3	4	4	4	3
1796	LINE	4	4	3	5	3	3	3
1797	LINE	4	4	2	2	4	4	4
1798	LINE	5	3	1	4	4	6	5
1799	LINE	1	4	2	5	2	7	5
1800	LINE	3	4	4	5	4	4	4
1801	LINE	2	7	2	3	3	3	5
1802	LINE	3	6	2	3	4	4	5
1803	LINE	4	4	4	4	4	4	4
1804	LINE	3	7	1	3	5	6	7
1805	LINE	7	7	3	1	5	7	7
1806	LINE	1	7	1	4	1	4	6
1807	LINE	2	5	3	4	1	4	3
1808	LINE	4	4	1	1	7	1	7
1809	LINE	1	7	1	1	1	7	7
1810	LINE	1	7	1	4	2	4	6
1811	LINE	4	4	2	2	5	7	7
1812	LINE	4	5	4	2	4	4	4
1813	LINE	4	3	2	4	5	4	4
1814	LINE	4	3	2	4	6	2	4
1815	LINE	4	4	2	2	5	7	7
1816	LINE	3	5	3	3	3	5	3
1817	LINE	6	5	1	1	4	6	6
1818	LINE	2	4	2	5	1	2	6
1819	LINE	4	3	2	4	3	5	6
1820	LINE	3	7	1	6	7	4	7
1821	LINE	3	3	2	4	3	3	4
1822	LINE	4	6	1	6	2	5	6
1823	LINE	7	2	1	1	1	4	5
1824	LINE	2	5	1	7	1	1	2
1825	LINE	2	6	2	6	3	5	5
1826	LINE	2	6	1	7	5	1	5
1827	LINE	6	7	5	7	5	1	6
1828	LINE	4	4	1	7	2	1	5
1829	LINE	1	6	1	2	7	7	7
1830	LINE	4	4	1	4	4	4	4
1831	Youtube	3	5	5	5	1	5	1
1832	Youtube	2	6	3	5	5	5	5
1833	Youtube	6	6	7	3	2	3	2
1834	Youtube	4	4	3	4	4	4	4
1835	Youtube	7	7	7	3	5	6	5
1836	Youtube	4	4	4	4	5	3	5
1837	Youtube	2	7	6	5	3	5	3
1838	Youtube	3	5	4	4	5	3	3
1839	Youtube	5	3	5	5	4	3	4
1840	Youtube	5	5	6	6	4	3	2
1841	Youtube	2	5	6	6	5	5	5
1842	Youtube	5	4	4	4	3	5	4
1843	Youtube	5	3	3	3	5	6	2
1844	Youtube	3	6	6	6	2	6	2
1845	Youtube	6	6	7	5	7	5	6
1846	Youtube	5	4	3	4	5	4	5
1847	Youtube	6	4	4	5	1	3	5
1848	Youtube	6	3	5	5	5	5	5
1849	Youtube	5	5	5	5	5	3	3
1850	Youtube	6	5	5	5	5	3	5
1851	Youtube	6	4	4	6	2	3	4
1852	Youtube	2	6	5	5	2	5	2
1853	Youtube	6	2	6	4	7	5	7
1854	Youtube	6	5	5	5	3	5	5
1855	Youtube	6	4	6	4	6	4	3
1856	Youtube	4	2	7	2	1	4	5
1857	Youtube	7	1	2	4	6	3	5
1858	Youtube	6	3	6	5	7	6	6
1859	Youtube	7	4	7	4	4	5	4
1860	Youtube	6	2	7	5	5	3	2
1861	Youtube	5	4	4	4	4	3	4
1862	Youtube	5	3	6	4	6	4	1
1863	Youtube	6	2	6	4	6	6	5
1864	Youtube	6	2	7	4	1	5	7
1865	Youtube	5	5	6	4	5	5	3
1866	Youtube	6	2	7	4	4	4	4
1867	Youtube	4	4	5	5	5	3	5
1868	Youtube	7	4	7	4	7	4	2
1869	Youtube	7	1	4	7	1	4	4
1870	Youtube	6	4	7	6	4	3	2
1871	Youtube	6	6	7	7	6	4	2
1872	Youtube	7	2	6	5	7	6	7
1873	Youtube	5	3	5	4	3	3	4
1874	Youtube	7	7	7	1	7	7	7
1875	Youtube	6	5	7	6	6	5	3
1876	Youtube	5	4	5	4	3	4	3
1877	Youtube	4	3	6	6	4	5	3
1878	Youtube	7	2	7	5	4	4	4
1879	Youtube	2	3	7	4	2	4	2
1880	Youtube	2	6	6	3	6	6	6
1881	Youtube	7	1	7	7	7	1	6
1882	Youtube	7	7	7	7	7	4	1
1883	Youtube	4	4	7	4	4	4	4
1884	Youtube	1	3	6	4	4	5	3
1885	Youtube	7	4	6	4	4	3	4
1886	Youtube	3	3	6	2	6	2	6
1887	Youtube	6	5	6	3	1	3	5
1888	Youtube	3	4	4	4	4	4	4
1889	Youtube	4	5	4	4	4	5	2
1890	Youtube	6	5	6	3	4	6	5
1891	Youtube	7	3	5	5	4	4	5
1892	Youtube	5	4	6	4	4	5	3
1893	Youtube	3	4	4	4	4	2	4
1894	Youtube	3	3	4	4	5	5	4
1895	Youtube	7	6	7	1	4	5	4
1896	Youtube	7	2	6	6	5	3	3
1897	Youtube	7	3	6	2	7	4	3
1898	Youtube	7	2	7	4	7	5	1
1899	Youtube	5	3	6	6	5	3	2
1900	Youtube	4	4	4	4	4	4	4
1901	Youtube	7	2	7	2	7	6	4
1902	Youtube	3	2	6	6	5	6	3
1903	Youtube	5	2	6	5	2	2	3
1904	Youtube	7	5	1	7	1	4	4
1905	Youtube	7	3	5	2	4	4	4
1906	Youtube	5	3	6	2	6	6	3
1907	Youtube	5	5	5	5	2	4	3
1908	Youtube	6	4	7	5	5	4	4
1909	Youtube	7	5	7	7	7	7	7
1910	Youtube	5	3	6	6	6	3	2
1911	Youtube	7	2	7	3	6	5	4
1912	Youtube	5	5	5	5	2	4	3
1913	Youtube	7	2	7	4	6	3	3
1914	Youtube	1	4	1	7	4	4	4
1915	Youtube	4	3	7	7	1	6	6
1916	Youtube	7	1	7	1	7	7	7
1917	Youtube	6	5	7	2	1	5	7
1918	Youtube	7	5	7	1	2	2	6
1919	Youtube	5	5	5	3	2	5	3
1920	Youtube	7	7	7	7	4	4	4
1921	Youtube	6	5	6	5	6	2	6
1922	Youtube	7	3	7	4	7	6	6
1923	Youtube	6	3	6	4	4	3	3
1924	Youtube	7	3	5	5	6	4	4
1925	Youtube	7	6	6	6	1	4	6
1926	Youtube	7	2	4	1	7	4	6
1927	Youtube	7	3	5	6	7	6	5
1928	Youtube	7	2	7	3	6	4	2
1929	Youtube	4	4	4	4	1	4	5
1930	Youtube	6	2	7	4	6	5	2
1931	Youtube	5	3	5	4	5	5	2
1932	Youtube	5	5	6	5	5	4	3
1933	Youtube	5	3	5	3	5	3	5
1934	Youtube	7	4	7	3	1	5	6
1935	Youtube	5	3	6	6	5	6	5
1936	Youtube	5	3	5	5	2	4	5
1937	Youtube	7	5	7	6	6	6	5
1938	Youtube	4	6	3	4	5	5	4
1939	Youtube	1	3	6	5	4	5	3
1940	Youtube	7	2	6	6	6	3	2
1941	Youtube	7	6	7	7	7	7	7
1942	Youtube	6	5	7	6	7	5	5
1943	Youtube	6	5	6	5	6	4	4
1944	Youtube	1	5	6	7	1	2	3
1945	Youtube	5	3	3	5	5	5	3
1946	Youtube	4	4	5	4	3	4	3
1947	Youtube	6	4	6	5	5	3	4
1948	Youtube	4	4	4	6	4	3	4
1949	Youtube	7	4	7	4	4	5	6
1950	Youtube	6	7	7	1	7	2	7
1951	Youtube	7	2	7	4	3	3	4
1952	Youtube	7	6	7	7	7	3	7
1953	Youtube	6	2	6	5	5	6	5
1954	Youtube	5	5	7	6	5	4	2
1955	Youtube	7	5	7	6	7	5	6
1956	Youtube	4	4	5	5	5	5	5
1957	Youtube	6	3	7	6	4	5	2
1958	Youtube	7	2	6	5	7	4	2
1959	Youtube	7	1	7	7	2	2	1
1960	Youtube	6	2	6	3	7	5	7
1961	Youtube	6	4	4	5	4	5	4
1962	Youtube	7	3	6	3	6	5	2
1963	Youtube	7	6	6	6	3	3	2
1964	Youtube	5	5	6	2	5	5	5
1965	Youtube	6	3	6	6	4	6	6
1966	Youtube	5	4	7	5	5	5	5
1967	Youtube	6	5	5	5	1	4	4
1968	Youtube	7	4	6	7	1	6	5
1969	Youtube	6	3	5	3	3	5	5
1970	Youtube	7	4	6	2	6	3	7
1971	Youtube	7	2	2	6	2	2	6
1972	Youtube	5	6	6	4	1	5	4
1973	Youtube	6	6	6	5	4	4	6
1974	Youtube	2	4	7	4	1	5	6
1975	Youtube	7	4	4	7	1	4	4
1976	Youtube	6	2	7	1	7	3	3
1977	Youtube	7	3	7	6	6	3	6
1978	Youtube	6	3	6	5	5	2	6
1979	Youtube	5	5	6	6	2	2	2
1980	Youtube	7	1	7	4	5	5	3
1981	Youtube	7	4	7	3	3	6	5
1982	Youtube	2	4	7	4	2	4	5
1983	Youtube	7	7	7	4	7	4	4
1984	Youtube	7	4	6	4	1	7	6
1985	Youtube	6	2	6	2	6	3	2
1986	Youtube	7	7	7	1	1	7	1
1987	Youtube	5	2	6	5	6	2	1
1988	Youtube	7	1	7	4	7	4	1
1989	Youtube	6	3	6	6	2	3	7
1990	Youtube	3	4	4	4	2	4	4
1991	Youtube	6	6	6	5	6	4	4
1992	Youtube	7	7	7	2	4	2	2
1993	Youtube	6	4	7	3	6	3	3
1994	Youtube	7	5	6	6	6	2	3
1995	Youtube	4	5	4	5	6	5	7
1996	Youtube	7	5	6	6	2	7	4
1997	Youtube	7	4	6	2	7	6	7
1998	Youtube	7	3	7	3	5	2	6
1999	Youtube	6	6	5	6	6	5	3
2000	Youtube	6	6	6	6	6	6	6
2001	Youtube	2	2	6	2	6	6	3
2002	Youtube	7	1	7	7	4	1	1
2003	Youtube	6	3	3	3	5	4	4
2004	Youtube	7	5	7	1	7	7	4
2005	Youtube	5	3	7	5	3	3	2
2006	Youtube	7	4	7	4	7	1	1
2007	Youtube	7	4	4	4	3	4	6
2008	Youtube	4	3	6	4	3	5	5
2009	Youtube	6	1	6	6	6	3	3
2010	Youtube	7	2	7	5	6	2	2
2011	Youtube	6	3	7	7	2	2	4
2012	Youtube	6	2	7	1	5	2	5
2013	Youtube	6	6	5	6	2	2	3
2014	Youtube	7	5	6	4	1	5	4
2015	Youtube	6	3	7	7	2	2	4
2016	Youtube	4	4	7	7	4	4	2
2017	Youtube	3	4	4	4	4	2	4
2018	Youtube	5	4	4	4	4	3	4
2019	Youtube	5	2	5	4	4	3	5
2020	Youtube	6	2	6	4	5	3	3
2021	Youtube	6	4	7	6	4	2	2
2022	Youtube	1	2	7	7	2	1	1
2023	Youtube	7	2	7	6	5	4	3
2024	Youtube	6	5	7	2	6	7	6
2025	Youtube	4	5	4	4	4	3	4
2026	Youtube	5	3	6	4	6	5	5
2027	Youtube	6	2	7	6	6	6	6
2028	Youtube	5	3	6	5	5	4	5
2029	Youtube	6	5	6	5	6	5	6
2030	Youtube	6	5	5	1	7	2	6
2031	Youtube	5	4	5	5	5	4	5
2032	Youtube	5	3	5	5	5	4	5
2033	Youtube	5	3	5	5	5	4	5
2034	Youtube	3	5	5	5	4	4	2
2035	Whatapp	4	6	5	5	3	5	4
2036	Whatapp	3	5	3	5	3	4	3
2037	Whatapp	5	4	4	5	4	4	5
2038	Whatapp	3	5	4	3	3	4	3
2039	Whatapp	5	3	3	3	4	2	6
2040	Whatapp	6	5	3	6	4	4	4
2041	Whatapp	3	4	4	5	3	4	3
2042	Whatapp	3	4	6	6	3	6	4
2043	Whatapp	5	5	6	3	2	6	3
2044	Whatapp	4	2	7	6	3	2	5
2045	Whatapp	3	4	3	5	3	4	3
2046	Whatapp	3	5	5	4	5	5	4
2047	Whatapp	5	3	2	2	4	4	3
2048	Whatapp	5	6	7	3	5	7	4
2049	Whatapp	4	4	4	3	4	4	4
2050	Whatapp	4	5	5	5	4	5	3
2051	Whatapp	5	6	3	6	5	7	6
2052	Whatapp	5	3	5	5	3	5	3
2053	Whatapp	4	4	4	3	5	4	4
2054	Whatapp	4	4	4	3	4	4	4
2055	Whatapp	2	5	2	2	7	6	6
2056	Whatapp	5	3	6	6	1	6	4
2057	Whatapp	6	6	2	2	6	4	2
2058	Whatapp	5	5	3	5	4	5	4
2059	Whatapp	4	4	4	4	4	4	4
2060	Whatapp	5	5	4	5	4	4	4
2061	Whatapp	3	4	5	4	4	4	4
2062	Whatapp	4	5	3	5	5	5	5
2063	Whatapp	4	6	5	4	4	5	4
2064	Whatapp	2	4	3	4	3	4	5
2065	Whatapp	4	4	4	4	4	4	4
2066	Whatapp	6	3	3	3	4	4	5
2067	Whatapp	6	7	7	6	6	7	7
2068	Whatapp	1	7	6	3	3	2	1
2069	Whatapp	4	5	3	4	4	3	5
2070	Whatapp	2	6	4	5	5	5	6
2071	Whatapp	4	4	3	4	4	3	4
2072	Whatapp	3	6	5	4	2	3	5
2073	Whatapp	6	6	3	5	3	5	5
2074	Whatapp	4	5	5	5	4	5	4
2075	Whatapp	3	4	2	2	5	6	6
2076	Whatapp	4	4	3	4	2	2	6
2077	Whatapp	6	2	6	6	4	4	4
2078	Whatapp	4	4	4	3	3	4	4
2079	Whatapp	4	5	4	4	4	4	4
2080	Whatapp	4	5	6	3	3	6	5
2081	Whatapp	5	4	3	4	4	4	6
2082	Whatapp	2	7	1	6	1	1	1
2083	Whatapp	4	5	2	5	3	3	4
2084	Whatapp	5	4	5	5	4	5	4
2085	Whatapp	4	4	4	4	4	4	4
2086	Whatapp	5	4	3	3	4	3	5
2087	Whatapp	4	3	3	5	2	3	4
2088	Whatapp	1	5	4	5	3	5	3
2089	Whatapp	5	4	4	5	4	3	5
2090	Whatapp	6	3	6	4	1	3	2
2091	Whatapp	3	4	5	3	4	3	4
2092	Whatapp	4	4	5	5	3	4	4
2093	Whatapp	1	5	1	1	5	6	7
2094	Whatapp	7	7	7	7	7	1	7
2095	Whatapp	4	5	5	4	5	5	5
2096	Whatapp	5	5	5	3	5	4	3
2097	Whatapp	4	3	3	3	5	5	4
2098	Whatapp	1	6	2	6	2	2	4
2099	Whatapp	5	4	5	3	5	5	5
2100	Whatapp	4	4	3	4	5	5	5
2101	Whatapp	6	7	1	1	2	6	6
2102	Whatapp	6	3	2	5	6	2	6
2103	Whatapp	4	5	3	4	4	5	5
2104	Whatapp	4	4	3	4	5	3	5
2105	Whatapp	2	5	3	3	5	5	5
2106	Whatapp	6	3	2	7	2	2	1
2107	Whatapp	4	2	2	4	6	5	7
2108	Whatapp	5	4	3	4	3	4	5
2109	Whatapp	5	4	5	3	3	4	5
2110	Whatapp	5	5	3	3	5	5	5
2111	Whatapp	4	4	5	4	5	3	4
2112	Whatapp	4	3	6	5	5	3	5
2113	Whatapp	5	5	5	5	5	4	5
2114	Whatapp	5	5	5	5	5	5	6
2115	Whatapp	4	4	5	5	4	3	4
2116	Whatapp	5	5	5	5	3	3	3
2117	Whatapp	4	4	3	3	5	4	3
2118	Whatapp	4	5	5	5	5	5	4
2119	Whatapp	5	5	5	5	5	5	5
2120	Whatapp	3	5	3	6	3	2	6
2121	Whatapp	2	3	6	4	3	5	5
2122	Whatapp	3	5	5	5	3	4	4
2123	Whatapp	4	4	4	4	4	4	4
2124	Whatapp	3	6	3	6	3	4	3
2125	Whatapp	4	4	4	4	4	4	4
2126	Whatapp	5	6	3	3	3	3	3
2127	Whatapp	4	6	2	4	3	4	5
2128	Whatapp	4	3	6	3	2	4	3
[truncated: 470 more rows]
